# Supplementary material for: Bromine radical enhanced stoichiometric pyridylation of alkylarenes and diarylmethanes at room temperature
Source: Royal Society of Chemistry journal article supplement (doi:10.1039/d2qo01908f), 2022-12-23

# Supporting Information

## Bromine Radical Enhanced Stoichiometric Pyridylation of Alkylarenes and Diarylmethanes at Room Temperature

Qiao-Lin Wang<sup>a</sup>, Huawen Huang<sup>\*a</sup>, Guojiang Mao<sup>b</sup>, and Guo-Jun Deng<sup>\*a</sup>

<sup>a</sup> Key Laboratory for Green Organic Synthesis and Application of Hunan Province, Key Laboratory of Environmentally Friendly Chemistry and Application of Ministry of Education, College of Chemistry, Xiangtan University, Xiangtan 411105, China.

E-mail: hwhuang@xtu.edu.cn; [gjdeng@xtu.edu.cn](mailto:gjdeng@xtu.edu.cn).

<sup>b</sup> School of Chemistry and Chemical Engineering, Henan Normal University, Xinxiang, 453007, P. R. China.

### List of Contents

|                                                                |            |
|----------------------------------------------------------------|------------|
| <b>1. General information</b>                                  | <b>S2</b>  |
| <b>2. Experimental section</b>                                 | <b>S3</b>  |
| <b>2.1 Typical experimental procedure for the pyridylation</b> | <b>S3</b>  |
| <b>2.2 Optimization of reaction conditions</b>                 | <b>S3</b>  |
| <b>2.3 Scale-up experiment</b>                                 | <b>S5</b>  |
| <b>3. Mechanistic studies</b>                                  | <b>S7</b>  |
| <b>3.1 Radical trapping experiments</b>                        | <b>S7</b>  |
| <b>3.2 Benzyl radical trapping experiments</b>                 | <b>S7</b>  |
| <b>3.3 Kinetic isotope effect</b>                              | <b>S8</b>  |
| <b>3.4 Stern–Volmer quenching</b>                              | <b>S8</b>  |
| <b>4. Analytical data</b>                                      | <b>S11</b> |
| <b>5. Reference</b>                                            | <b>S25</b> |
| <b>6. Copies of NMR spectra</b>                                | <b>S26</b> |

## 1. General information

All reactions were carried out with magnetic stirring and in dried glassware. Standard syringe techniques were applied for transfer of dry solvents. All reagents and solvents were commercially available and used without any further purification unless specified. The reactions via general procedure was carried out under an atmosphere of argon unless otherwise noted. Column chromatography was performed using silica gel (200-300 mesh) or thin layer chromatography was performed using silica gel (GF254).  $^1\text{H}$  NMR and  $^{13}\text{C}$  NMR spectra were recorded on Bruker-AV (400 and 100 MHz, respectively) instrument using  $\text{CDCl}_3$  as solvent. Mass spectra were measured on Agilent 5975 GC-MS instrument (EI). High-resolution mass spectra (ESI) were obtained with the Thermo Scientific LTQ Orbitrap XL mass spectrometer. The structures of known compounds were further corroborated by comparing their  $^1\text{H}$  NMR,  $^{13}\text{C}$  NMR data and HRMS data with those in literature. Melting points were measured with a YUHUA X-5 melting point instrument and were uncorrected.

## 2. Experiment section

### 2.1 Typical experimental procedure for the pyridylation

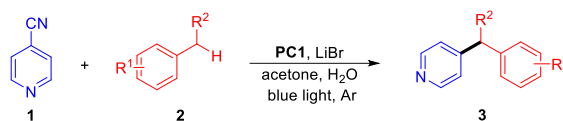

To a Schlenk tube was added **1** (0.2 mmol), **2** (0.4 mmol, 2.0 equiv), **PC1** (0.004 mmol, 2 mol%), LiBr (20 mol%), H<sub>2</sub>O (1.2 mL), acetone (3 mL). Then the mixture was stirred at room temperature in argon atmosphere (1 atm) under 35 W blue LED light for 16 h until complete consumption of starting material as monitored by TLC and GC-MS analysis. After the reaction was finished, the reaction mixture was washed with brine. The aqueous phase was re-extracted with EtOAc (3×10 mL). The combined organic extracts were dried over Na<sub>2</sub>SO<sub>4</sub> and concentrated in vacuum. The residue was purified by silica gel flash column chromatography (hexane/ethyl acetate = 20 : 1 to 5 : 1) to afford the desired products **3**.

### 2.2 Optimization of reaction conditions

**Table S1.** Screening of amount **2a**<sup>a</sup>

Reaction scheme showing the pyridylation of **1a** (4-cyanopyridine) with **2a** (4-methoxybenzaldehyde) to form **3aa**. The reaction conditions are: PC1, LiBr, acetone, H<sub>2</sub>O, Ar, blue light, 16 h.

| Entry | Variation from standard conditions | Yield (%) <sup>b</sup> |
|-------|------------------------------------|------------------------|
| 1     | 10 equiv                           | 84                     |
| 2     | 2 equiv                            | 88                     |

<sup>a</sup> Reaction conditions: **1a** (0.2 mmol), **2a**, **PC1** (0.004 mmol, 2 mol%), LiBr (0.04 mmol, 20 mol%), H<sub>2</sub>O (1.2 mL), acetone (3 mL). Then the mixture was stirred at room temperature in Ar atmosphere (1 atm) under 35 W blue LED light for 16 h at room temperature. <sup>b</sup> Isolated yields.

**Table S2.** Control experiments<sup>a</sup>

Reaction scheme showing the pyridylation of **1a** (4-cyanopyridine) with **2a** (4-methoxybenzaldehyde) to form **3aa**. The reaction conditions are: PC1, LiBr, acetone, H<sub>2</sub>O, Ar, blue light, 16 h.

| Entry | Variation from standard conditions | Yield (%) <sup>b</sup> |
|-------|------------------------------------|------------------------|
| 1     | none                               | 88                     |
| 2     | No <b>PC1</b>                      | 0                      |
| 3     | No light                           | 0                      |
| 4     | No LiBr                            | 0                      |

<sup>a</sup> Reaction conditions: **1a** (0.2 mmol), **2a** (0.4 mmol, 2 equiv), photocatalyst (0.004 mmol, 2 mol%), LiBr (0.04 mmol, 20 mol%), H<sub>2</sub>O (1.2 mL), acetone (3 mL). Then the mixture was stirred at room temperature in Ar atmosphere (1 atm) under 35 W blue LED light for 16 h at room temperature. <sup>b</sup> Isolated yields.

**Table S3.** Screening of photocatalyst <sup>a</sup>
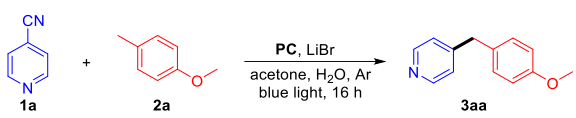

| Entry | Photocatalyst | Yield (%) <sup>b</sup> |
|-------|---------------|------------------------|
| 1     | <b>PC1</b>    | 88                     |
| 2     | <b>PC2</b>    | 0                      |
| 3     | <b>PC3</b>    | 0                      |
| 4     | <b>PC4</b>    | 0                      |
| 5     | <b>PC5</b>    | 0                      |
| 6     | <b>PC6</b>    | 58                     |



**PC1:** Ir(dF(CF<sub>3</sub>)ppy)<sub>2</sub>(dtbbpy)]PF<sub>6</sub><sup>-</sup>  
**PC2:** 4CzIPN  
**PC3:** Ru(bpy)<sub>3</sub>Cl<sub>2</sub><sup>2+</sup>  
**PC4:** fac-Ir(ppy)<sub>3</sub>  
**PC5:** Rose Bengal  
**PC6:** Eosin Y

<sup>a</sup> Reaction conditions: **1a** (0.2 mmol), **2a** (0.4 mmol, 2 equiv), **PC** (0.004 mmol, 2 mol%), LiBr (0.04 mmol, 20 mol%), H<sub>2</sub>O (1.2 mL), acetone (3 mL). Then the mixture was stirred at room temperature in Ar atmosphere (1 atm) under 35 W blue LED light for 16 h at room temperature. <sup>b</sup> Isolated yields.

**Table S4.** Screening of H<sub>2</sub>O <sup>a</sup>
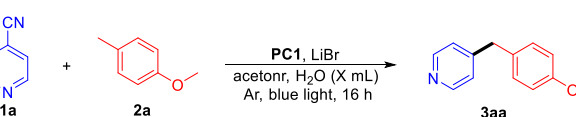

| Entry | H <sub>2</sub> O (X mL) | Yield (%) <sup>b</sup> |
|-------|-------------------------|------------------------|
| 1     | 1.0                     | 66                     |
| 2     | 1.1                     | 78                     |
| 3     | 1.2                     | 88                     |
| 4     | 1.3                     | 71                     |
| 5     | 1.4                     | 63                     |
| 6     | 1.5                     | 56                     |

<sup>a</sup> Reaction conditions: **1a** (0.2 mmol), **2a** (0.4 mmol, 2 equiv), **PC1** (0.004 mmol, 2 mol%), LiBr (0.04 mmol, 20 mol%), H<sub>2</sub>O (X mL), acetone (3 mL). Then the mixture was stirred at room temperature in Ar atmosphere (1 atm) under 35 W blue LED light for 16 h at room temperature. <sup>b</sup> Isolated yields.

**Table S5.** Screening of HAT reagents <sup>a</sup>

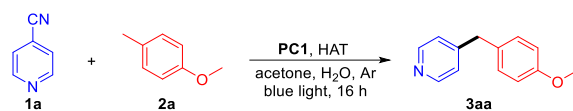

| Entry | HAT                             | Yield (%) <sup>b</sup> |
|-------|---------------------------------|------------------------|
| 1     | LiBr                            | 88                     |
| 2     | NH <sub>4</sub> Br              | 62                     |
| 3     | NaBr                            | 50                     |
| 4     | TBAB                            | 60                     |
| 5     | NBS                             | 22                     |
| 6     | LiCl                            | 52                     |
| 7     | NH <sub>4</sub> I               | 0                      |
| 8     | LiF                             | trace                  |
| 9     | CH <sub>2</sub> Br <sub>2</sub> | 20                     |
| 10    | NiBr <sub>2</sub>               | 23                     |
| 11    | LiBr (10 mol%)                  | 65                     |
| 12    | LiBr (50 mol%)                  | 72                     |

<sup>a</sup> Reaction conditions: **1a** (0.2 mmol), **2a** (0.4 mmol, 2 equiv), **PC1** (0.004 mmol, 2 mol%), HAT (0.04 mmol, 20 mol%), H<sub>2</sub>O (1.2 mL), acetone (3 mL). Then the mixture was stirred at room temperature in Ar atmosphere (1 atm) under 35 W blue LED light for 16 h at room temperature. <sup>b</sup> Isolated yields.

**Table S6.** Screening of solvent<sup>a</sup>

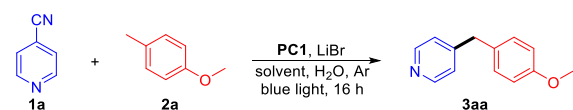

| Entry | solvent            | Yield (%) <sup>b</sup> |
|-------|--------------------|------------------------|
| 1     | acetone            | 88                     |
| 2     | CH <sub>3</sub> CN | 22                     |
| 3     | THF                | 14                     |
| 4     | DCM                | 9                      |
| 5     | DMSO               | 47                     |
| 6     | EtOH               | 48                     |

<sup>a</sup> Reaction conditions: **1a** (0.2 mmol), **2a** (0.4 mmol, 2 equiv), **PC1** (0.004 mmol, 2 mol%), LiBr (0.04 mmol, 20 mol%), H<sub>2</sub>O (1.2 mL), solvent (3 mL). Then the mixture was stirred at room temperature in Ar atmosphere (1 atm) under 35 W blue LED light for 16 h at room temperature. <sup>b</sup> Isolated yields.

### 2.3 Scale-up experiment

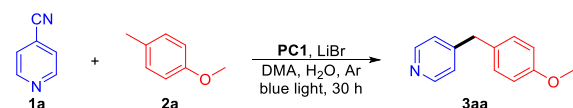

A 50 mL Schlenk tube was added **1a** (4.0 mmol), **2a** (8 mmol, 2.0 equiv), **PC1** (0.06 mmol, 1.5 mol%), LiBr (0.8 mmol, 20 mol%), H<sub>2</sub>O (18 mL), acetone (30 mL). Then the mixture was stirred at room temperature in argon atmosphere (1 atm) under 35 W blue LED light for 30 h. After the reaction was

finished, the reaction mixture was washed with brine. The aqueous phase was re-extracted with EtOAc (3×10 mL). The combined organic extracts were dried over Na<sub>2</sub>SO<sub>4</sub> and concentrated in vacuum. The residue was purified by silica gel flash column chromatography (hexane/ethyl acetate = 5 : 1) to afford the desired products **3aa** in 66% yield.

### 3. Mechanistic studies

#### 3.1 Radical trapping experiments

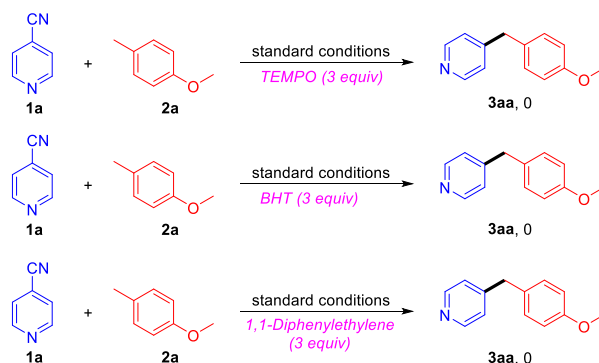

Three reactions of radical trapping experiments were performed. A solution of TEMPO (3.0 equiv, 0.6 mmol), BHT (3 equiv, 0.6 mmol) or 1,1-diphenylethylene (3 equiv, 0.6 mmol), **1a** (0.2 mmol), **2a** (0.4 mmol, 2.0 equiv), **PC1** (0.004 mmol, 2 mol%), LiBr (0.04 mmol, 20 mol%), H<sub>2</sub>O (1.2 mL), acetone (3 mL). Then the mixture was stirred at room temperature in argon atmosphere (1 atm) under 35 W blue LED light for 16 h.

#### 3.2 Benzyl radical trapping experiments

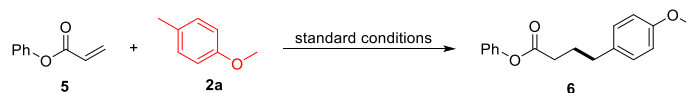

To a Schlenk tube was added **2a** (0.2 mmol), **5** (0.2 mmol, 1.0 equiv), **PC1** (0.004 mmol, 2 mol%), LiBr (0.04 mmol, 20 mol%), H<sub>2</sub>O (1.2 mL), acetone (3 mL). Then the mixture was stirred at room temperature in argon atmosphere (1 atm) under 35 W blue LED light for 16 h. Phenyl 4-(4-methoxyphenyl)butanoate **6** could be detected by GC-MS.





$\text{Ir}[\text{dF}(\text{CF}_3)\text{ppy}]_2(\text{dtbbpy})\text{PF}_6$  (2.8 mg) was dissolved in acetone (25.0 mL) to set the concentration to be 0.1 mM.

**Experimental procedure:** The resulting 0.1 M solution (50  $\mu\text{L}$ ) was added to cuvette to obtain different concentrations of catalyst solution. This solution was then diluted to a volume of 2.0 mL by adding further solvent (acetone) to prepare a 2.5  $\mu\text{M}$  solution. The resulting mixture was sparged with nitrogen for 3 minutes and then irradiated at 425 nm. Fluorescence emission spectra were recorded (3 trials per sample). Into this solution, 20.0  $\mu\text{L}$  of isonicotinonitrile solution was successively added and uniformly stirred, and the resulting mixture was bubbled with nitrogen for 3 minutes and irradiated at 375 nm. Fluorescence emission spectra of 0  $\mu\text{L}$ , 20.0  $\mu\text{L}$ , 40.0  $\mu\text{L}$ , 60.0  $\mu\text{L}$ , 80.0  $\mu\text{L}$ , 100.0  $\mu\text{L}$ , fluorescence intensity. Follow this method and make changes to the amount to obtain the Stern–Volmer relationship in turn.

(a)  $\text{Ir}[\text{dF}(\text{CF}_3)\text{ppy}]_2(\text{dtbbpy})\text{PF}_6$  quenched by **1a** in acetone.

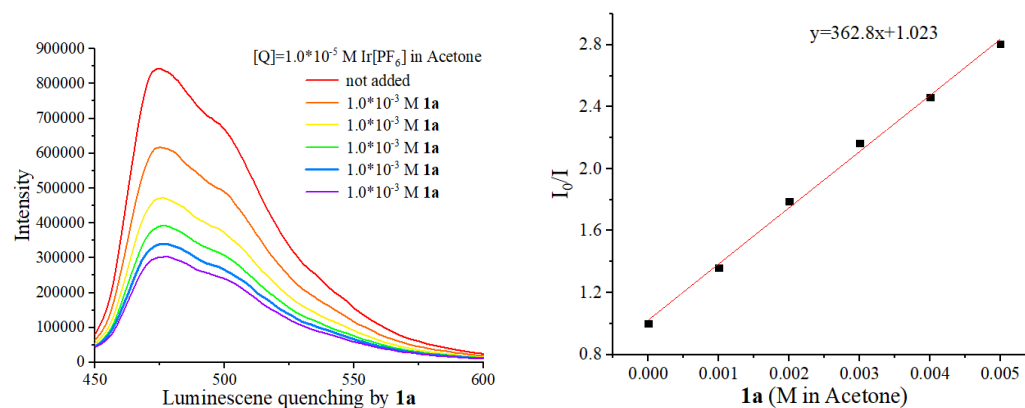

The emission intensity of the  $\text{Ir}[\text{dF}(\text{CF}_3)\text{ppy}]_2(\text{dtbbpy})\text{PF}_6$  catalyst solution slightly affected by the gradual increase of the amount of **1a**.

(b)  $\text{Ir}[\text{dF}(\text{CF}_3)\text{ppy}]_2(\text{dtbbpy})\text{PF}_6$  quenched by **2a** in acetone. Linear quenching is not observed.

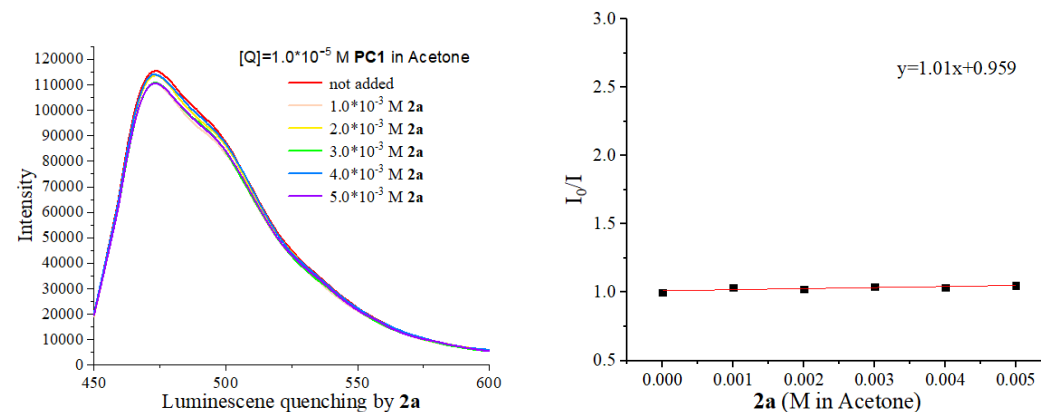

(c) Ir[dF(CF<sub>3</sub>)ppy]<sub>2</sub>(dtbbpy)PF<sub>6</sub> quenched by **LiBr** in acetone.

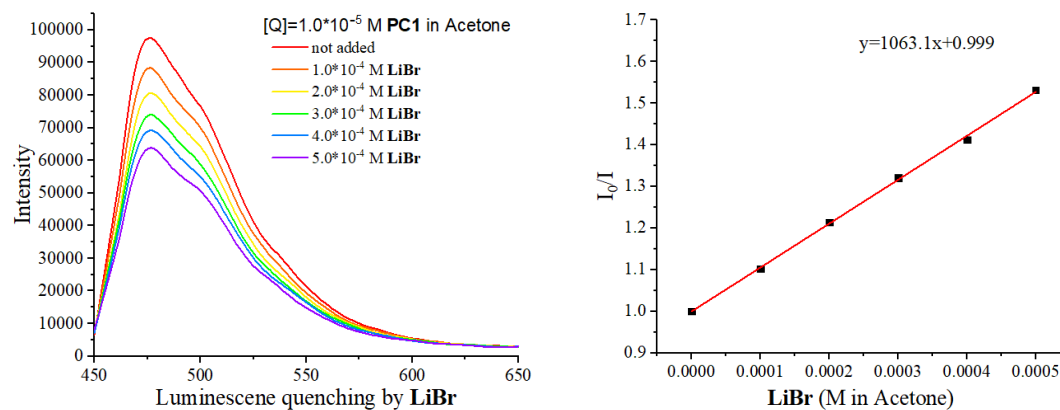

The emission intensity of the Ir[dF(CF<sub>3</sub>)ppy]<sub>2</sub>(dtbbpy)PF<sub>6</sub> catalyst solution slightly affected by the gradual increase of the amount of **LiBr**.

#### 4. Analytical data

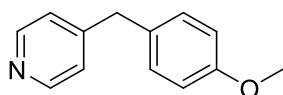

##### 4-(4-Methoxybenzyl)pyridine (3a)

Yield: 35.0 mg, 88%; colorless oil;  $^1\text{H NMR}$  (400 MHz,  $\text{CDCl}_3$ )  $\delta$ : 8.47 (d,  $J = 5.1$  Hz, 2H), 7.08 (d,  $J = 5.7$  Hz, 4H), 6.85 (d,  $J = 8.2$  Hz, 2H), 3.90 (s, 2H), 3.79 (s, 3H).  $^{13}\text{C NMR}$  (100 MHz,  $\text{CDCl}_3$ )  $\delta$ : 158.2, 150.5, 149.6, 130.8, 129.9, 124.0, 114.0, 55.1, 40.2.

These spectroscopic data correspond to reported data.<sup>[2]</sup>

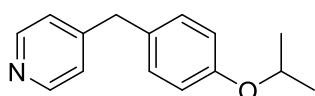

##### 4-(4-Isopropoxybenzyl)pyridine (3b)

Yield: 42.2 mg, 93%; colorless oil;  $^1\text{H NMR}$  (400 MHz,  $\text{CDCl}_3$ )  $\delta$ : 8.47 (d,  $J = 6.1$  Hz, 2H), 7.09 (d,  $J = 6.0$  Hz, 2H), 7.06 (d,  $J = 8.5$  Hz, 2H), 6.83 (d,  $J = 8.6$  Hz, 2H), 4.51 (m, 1H), 3.89 (s, 2H), 1.33 (s, 3H), 1.31 (s, 3H).  $^{13}\text{C NMR}$  (100 MHz,  $\text{CDCl}_3$ )  $\delta$ : 156.6, 150.5, 149.7, 130.6, 130.0, 124.1, 116.0, 69.8, 40.3, 22.0. HRMS (ESI)  $m/z$  calcd for  $\text{C}_{15}\text{H}_{18}\text{ON}$  ( $\text{M}+\text{H}$ )<sup>+</sup> 228.1383, found 228.1384.

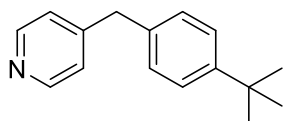

##### 4-(4-tert-Butylbenzyl)pyridine (3c)

Yield: 41.0 mg, 91%; colorless oil;  $^1\text{H NMR}$  (400 MHz,  $\text{CDCl}_3$ )  $\delta$ : 8.49 (d,  $J = 6.1$  Hz, 2H), 7.34 (d,  $J = 8.3$  Hz, 2H), 7.11 (t,  $J = 7.0$  Hz, 4H), 3.94 (s, 2H), 1.31 (s, 9H).  $^{13}\text{C NMR}$  (100 MHz,  $\text{CDCl}_3$ )  $\delta$ : 150.3, 149.6, 149.5, 135.7, 128.6, 125.6, 124.2, 40.7, 34.4, 31.3.

These spectroscopic data correspond to reported data.<sup>[2]</sup>

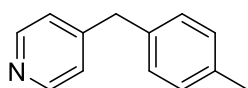

##### 4-(4-Methylbenzyl)pyridine (3d)

Yield: 29.7 mg, 81%; colorless oil;  $^1\text{H NMR}$  (400 MHz,  $\text{CDCl}_3$ )  $\delta$ : 8.48 (d,  $J = 5.0$  Hz, 2H), 7.16 – 7.09 (m, 4H), 7.06 (d,  $J = 7.9$  Hz, 2H), 3.93 (s, 2H), 2.33 (s, 3H).  $^{13}\text{C NMR}$  (100 MHz,  $\text{CDCl}_3$ )  $\delta$ : 150.6, 149.5, 136.3, 135.7, 129.4, 128.9, 124.2, 40.8, 21.0.

These spectroscopic data correspond to reported data.<sup>[2]</sup>

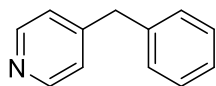

#### 4-Benzylpyridine (3e)

Yield: 25.0 mg, 74%; colorless oil;  $^1\text{H NMR}$  (400 MHz,  $\text{CDCl}_3$ )  $\delta$ : 8.49 (d,  $J = 6.1$  Hz, 2H), 7.32 (t,  $J = 7.3$  Hz, 2H), 7.25 (d,  $J = 5.7$  Hz, 1H), 7.17 (d,  $J = 6.9$  Hz, 2H), 7.11 (d,  $J = 6.0$  Hz, 2H), 3.97 (s, 2H).  $^{13}\text{C NMR}$  (100 MHz,  $\text{CDCl}_3$ )  $\delta$ : 150.1, 149.7, 138.8, 129.0, 128.7, 126.7, 124.2, 41.2.

These spectroscopic data correspond to reported data.<sup>[3]</sup>

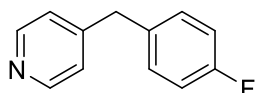

#### 4-(4-Fluorobenzyl)pyridine (3f)

Yield: 23.2 mg, 62%; colorless oil;  $^1\text{H NMR}$  (400 MHz,  $\text{CDCl}_3$ )  $\delta$ : 8.49 (d,  $J = 6.1$  Hz, 2H), 7.18 – 7.10 (m, 2H), 7.08 (d,  $J = 6.0$  Hz, 2H), 7.00 (t,  $J = 8.7$  Hz, 2H), 3.94 (s, 2H).  $^{13}\text{C NMR}$  (100 MHz,  $\text{CDCl}_3$ )  $\delta$ : 161.7 (d,  $J = 243.6$  Hz), 149.81, 134.5 (d,  $J = 3.3$  Hz), 130.5, 130.4, 124.0, 115.5 (d,  $J = 21.2$  Hz), 40.33.

These spectroscopic data correspond to reported data.<sup>[3]</sup>

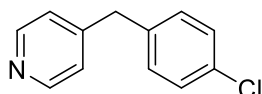

#### 4-(4-Chlorobenzyl)pyridine (3g)

Yield: 22.7 mg, 56%; colorless oil;  $^1\text{H NMR}$  (400 MHz,  $\text{CDCl}_3$ )  $\delta$ : 8.50 (d,  $J = 6.1$  Hz, 2H), 7.28 (d,  $J = 8.4$  Hz, 2H), 7.10 (d,  $J = 8.5$  Hz, 2H), 7.07 (d,  $J = 6.2$  Hz, 2H), 3.93 (s, 2H).  $^{13}\text{C NMR}$  (100 MHz,  $\text{CDCl}_3$ )  $\delta$ : 149.9, 149.4, 137.2, 132.6, 130.3, 128.8, 124.1, 40.5.

These spectroscopic data correspond to reported data.<sup>[3]</sup>

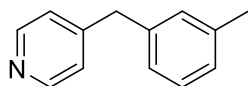

#### 4-(3-Methylbenzyl)pyridine (3i)

Yield: 27.5 mg, 75%; colorless oil;  $^1\text{H NMR}$  (400 MHz,  $\text{CDCl}_3$ )  $\delta$ : 8.49 (d,  $J = 6.1$  Hz, 2H), 7.21 (t,  $J = 7.8$  Hz, 1H), 7.11 (d,  $J = 6.0$  Hz, 2H), 7.06 (d,  $J = 7.5$  Hz, 1H), 6.97 (d,  $J = 7.1$  Hz, 2H), 3.92 (s, 2H), 2.32 (s, 3H).  $^{13}\text{C NMR}$  (100 MHz,  $\text{CDCl}_3$ )  $\delta$ : 150.2, 149.7, 138.7, 138.4, 129.8, 128.6, 127.4, 126.0, 124.2, 41.2, 21.4.

These spectroscopic data correspond to reported data.<sup>[3]</sup>

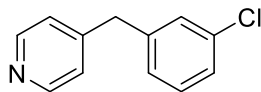

#### 4-(3-Chlorobenzyl)pyridine (3j)

Yield: 19.1 mg, 47%; colorless oil;  $^1\text{H NMR}$  (400 MHz,  $\text{CDCl}_3$ )  $\delta$ : 8.51 (d,  $J = 6.1$  Hz, 2H), 7.29 – 7.20 (m, 2H), 7.16 (s, 1H), 7.09 (d,  $J = 6.1$  Hz, 2H), 7.05 (d,  $J = 6.4$  Hz, 1H), 3.94 (s, 2H).  $^{13}\text{C NMR}$  (100 MHz,  $\text{CDCl}_3$ )  $\delta$ : 149.9, 149.1, 140.8, 134.5, 130.0, 129.1, 127.2, 126.9, 124.1, 40.8. HRMS (ESI)  $m/z$  calcd for  $\text{C}_{12}\text{H}_{11}\text{ClN}$  ( $\text{M}+\text{H}$ ) $^+$  204.0575, found 204.0574.

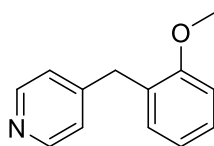

#### 4-(2-Methoxybenzyl)pyridine (3k)

Yield: 29.5 mg, 74%; colorless oil;  $^1\text{H NMR}$  (400 MHz,  $\text{CDCl}_3$ )  $\delta$ : 8.44 (d,  $J = 6.1$  Hz, 2H), 7.26 – 7.19 (m, 1H), 7.13 – 7.05 (m, 3H), 6.89 (dd,  $J = 15.1, 7.6$  Hz, 2H), 3.94 (s, 2H), 3.77 (s, 3H).  $^{13}\text{C NMR}$  (100 MHz,  $\text{CDCl}_3$ )  $\delta$ : 157.3, 150.2, 149.5, 130.4, 128.1, 127.3, 124.1, 120.5, 110.5, 55.2, 35.5.

These spectroscopic data correspond to reported data.<sup>[3]</sup>

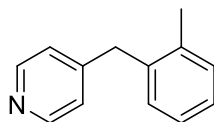

#### 4-(2-Methylbenzyl)pyridine (3l)

Yield: 24.2 mg, 66%; colorless oil;  $^1\text{H NMR}$  (400 MHz,  $\text{CDCl}_3$ )  $\delta$ : 8.47 (d,  $J = 6.1$  Hz, 2H), 7.24 – 7.15 (m, 3H), 7.13 – 7.08 (m, 1H), 7.03 (d,  $J = 5.1$  Hz, 2H), 3.98 (s, 2H), 2.20 (s, 3H).  $^{13}\text{C NMR}$  (100 MHz,  $\text{CDCl}_3$ )  $\delta$ : 149.7, 149.5, 136.7, 136.6, 130.5, 130.1, 127.1, 126.2, 123.9, 38.8, 19.6.

These spectroscopic data correspond to reported data.<sup>[3]</sup>

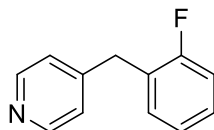

#### 4-(2-Fluorobenzyl)pyridine (3m)

Yield: 18.0 mg, 48%; colorless oil;  $^1\text{H NMR}$  (400 MHz,  $\text{CDCl}_3$ )  $\delta$ : 8.49 (d,  $J = 6.0$  Hz, 2H), 7.29 – 7.21 (m, 2H), 7.19 – 7.03 (m, 5H), 3.99 (s, 2H).  $^{13}\text{C NMR}$  (100 MHz,  $\text{CDCl}_3$ )  $\delta$ : 160.9 (d,  $J = 244.5$  Hz),

149.8, 148.8, 131.0 (d,  $J = 4.4$  Hz), 128.7 (d,  $J = 8.0$  Hz), 125.9 (d,  $J = 15.8$  Hz), 124.3 (d,  $J = 3.6$  Hz), 124.0, 115.6 (d,  $J = 21.7$  Hz), 34.4, 34.4. HRMS (ESI)  $m/z$  calcd for  $C_{12}H_{10}FNNa$  ( $M+Na$ )<sup>+</sup> 210.0869, found 210.0872.

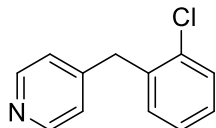

#### 4-(2-Chlorobenzyl)pyridine (3n)

Yield: 16.2 mg, 40%; colorless oil; <sup>1</sup>H NMR (400 MHz, CDCl<sub>3</sub>)  $\delta$ : 8.49 (d,  $J = 6.0$  Hz, 2H), 7.43 – 7.36 (m, 1H), 7.22 (t,  $J = 4.5$  Hz, 2H), 7.20 – 7.15 (m, 1H), 7.09 (d,  $J = 5.1$  Hz, 2H), 4.10 (s, 2H). <sup>13</sup>C NMR (100 MHz, CDCl<sub>3</sub>)  $\delta$ : 149.8, 148.6, 136.5, 134.3, 131.1, 129.8, 128.4, 127.1, 124.1, 38.7. HRMS (ESI)  $m/z$  calcd for  $C_{12}H_{10}ClNNa$  ( $M+Na$ )<sup>+</sup> 226.0394, found 226.0396.

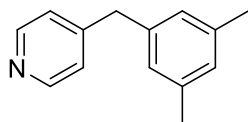

#### 4-(3,5-Dimethylbenzyl)pyridine (3o)

Yield: 32.3 mg, 82%; colorless oil; <sup>1</sup>H NMR (400 MHz, CDCl<sub>3</sub>)  $\delta$ : 8.49 (d,  $J = 6.1$  Hz, 2H), 7.11 (d,  $J = 6.0$  Hz, 2H), 6.88 (s, 1H), 6.79 (s, 2H), 3.88 (s, 2H), 2.28 (s, 6H). <sup>13</sup>C NMR (100 MHz, CDCl<sub>3</sub>)  $\delta$ : 150.3, 149.7, 138.7, 138.3, 128.3, 126.8, 124.2, 41.1, 21.2.

These spectroscopic data correspond to reported data.<sup>[4]</sup>

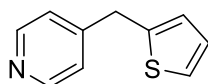

#### 4-(Thiophen-2-ylmethyl)pyridine (3p)

Yield: 27.7 mg, 79%; colorless oil; <sup>1</sup>H NMR (400 MHz, CDCl<sub>3</sub>)  $\delta$ : 8.51 (d,  $J = 6.1$  Hz, 2H), 7.19 (dd,  $J = 5.2, 1.2$  Hz, 1H), 7.16 (d,  $J = 6.0$  Hz, 2H), 6.96-6.94 (m, 1H), 6.83 (dd,  $J = 3.5, 1.1$  Hz, 1H), 4.15 (s, 2H). <sup>13</sup>C NMR (100 MHz, CDCl<sub>3</sub>)  $\delta$ : 149.8, 149.2, 140.9, 127.0, 125.98, 124.59, 123.7, 35.2. HRMS (ESI)  $m/z$  calcd for  $C_{10}H_{10}NS$  ( $M+H$ )<sup>+</sup> 176.0528, found 176.0529.

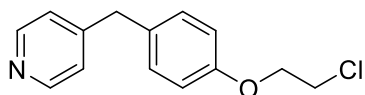

#### 4-(4-(2-Chloroethoxy)benzyl)pyridine (3q)

Yield: 37.1 mg, 75%; colorless oil; <sup>1</sup>H NMR (400 MHz, CDCl<sub>3</sub>)  $\delta$ : 8.48 (d,  $J = 6.1$  Hz, 2H), 7.14 – 7.04 (m, 4H), 6.87 (d,  $J = 8.6$  Hz, 2H), 4.21 (t,  $J = 5.9$  Hz, 2H), 3.91 (s, 2H), 3.81 (t,  $J = 5.9$  Hz, 2H). <sup>13</sup>C

NMR (100 MHz, CDCl<sub>3</sub>)  $\delta$ : 157.0, 150.4, 149.7, 131.7, 130.1, 124.1, 114.9, 41.9, 40.3. HRMS (ESI)  $m/z$  calcd for C<sub>14</sub>H<sub>15</sub>ClNO (M+H)<sup>+</sup> 248.0837, found 248.0839.

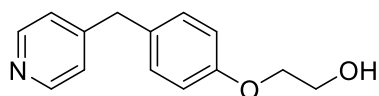

**2-(4-(Pyridin-4-ylmethyl)phenoxy)ethan-1-ol (3r)**

Yield: 25.7 mg, 56%; colorless oil; <sup>1</sup>H NMR (400 MHz, CDCl<sub>3</sub>)  $\delta$ : 8.48 (d,  $J$  = 6.1 Hz, 1H), 7.14 – 7.04 (m, 2H), 6.87 (d,  $J$  = 8.6 Hz, 1H), 4.07 (t,  $J$  = 8.1 Hz, 1H), 3.96 (t,  $J$  = 8.1 Hz, 1H), 3.91 (s, 1H). <sup>13</sup>C NMR (100 MHz, CDCl<sub>3</sub>)  $\delta$ : 157.4, 150.6, 149.6, 131.3, 130.1, 124.1, 114.7, 69.2, 61.4, 40.3. HRMS (ESI)  $m/z$  calcd for C<sub>14</sub>H<sub>15</sub>NO<sub>2</sub>Na (M+Na)<sup>+</sup> 252.0995, found 252.0996.

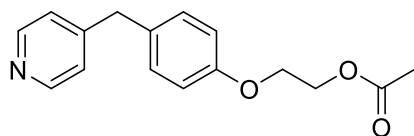

**2-(4-(Pyridin-4-ylmethyl)phenoxy)ethyl acetate (3s)**

Yield: 43.9 mg, 81%; colorless oil; <sup>1</sup>H NMR (400 MHz, CDCl<sub>3</sub>)  $\delta$ : 8.47 (d,  $J$  = 6.0 Hz, 2H), 7.14 – 7.03 (m, 4H), 6.86 (d,  $J$  = 8.5 Hz, 2H), 4.41 (t,  $J$  = 4.8 Hz, 2H), 4.15 (t,  $J$  = 4.6 Hz, 2H), 3.90 (s, 2H), 2.09 (s, 3H). <sup>13</sup>C NMR (100 MHz, CDCl<sub>3</sub>)  $\delta$ : 171.0, 157.2, 150.4, 149.7, 131.4, 130.1, 124.0, 114.8, 65.9, 62.8, 40.3, 20.9. HRMS (ESI)  $m/z$  calcd for C<sub>16</sub>H<sub>17</sub>NO<sub>3</sub>Na (M+Na)<sup>+</sup> 294.1101, found 294.1105.

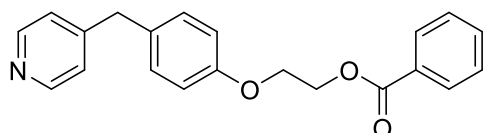

**2-(4-(Pyridin-4-ylmethyl)phenoxy)ethyl benzoate (3t)**

Yield: 55.3 mg, 83%; colorless oil; <sup>1</sup>H NMR (400 MHz, CDCl<sub>3</sub>)  $\delta$ : 8.48 (d,  $J$  = 5.7 Hz, 2H), 8.05 (d,  $J$  = 7.3 Hz, 2H), 7.56 (t,  $J$  = 7.4 Hz, 1H), 7.43 (t,  $J$  = 7.7 Hz, 2H), 7.14 – 7.06 (m, 4H), 6.90 (d,  $J$  = 8.5 Hz, 2H), 4.66 (d,  $J$  = 4.4 Hz, 2H), 4.30 (d,  $J$  = 4.8 Hz, 2H), 3.91 (s, 2H). <sup>13</sup>C NMR (100 MHz, CDCl<sub>3</sub>)  $\delta$ : 166.5, 157.3, 150.6, 149.6, 133.1, 131.4, 130.1, 129.8, 129.7, 128.3, 124.1, 114.9, 63.3, 40.3. HRMS (ESI)  $m/z$  calcd for C<sub>21</sub>H<sub>19</sub>NO<sub>3</sub>Na (M+Na)<sup>+</sup> 356.1257, found 356.1263.

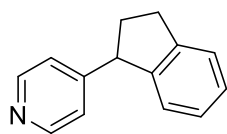

**4-(2,3-Dihydro-1H-inden-1-yl)pyridine (4a)**

Yield: 34.7 mg, 89%; colorless oil;  $^1\text{H}$  NMR (400 MHz,  $\text{CDCl}_3$ )  $\delta$ : 8.51 (d,  $J = 6.0$  Hz, 2H), 7.31 (d,  $J = 7.3$  Hz, 1H), 7.22 (t,  $J = 7.4$  Hz, 1H), 7.15 (t,  $J = 7.4$  Hz, 1H), 7.11 (d,  $J = 6.1$  Hz, 2H), 6.94 (d,  $J = 7.5$  Hz, 1H), 4.32 (t,  $J = 8.1$  Hz, 1H), 3.12 – 2.93 (m, 2H), 2.66 – 2.55 (m, 1H), 2.09 – 1.99 (m, 1H).  $^{13}\text{C}$  NMR (100 MHz,  $\text{CDCl}_3$ )  $\delta$ : 154.4, 149.7, 144.8, 144.3, 127.0, 126.5, 124.7, 124.5, 123.4, 50.8, 35.8, 31.7.

These spectroscopic data correspond to reported data.<sup>[5]</sup>

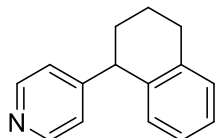

#### 4-(1,2,3,4-Tetrahydronaphthalen-1-yl)pyridine (4b)

Yield: 36.8 mg, 88%; colorless oil;  $^1\text{H}$  NMR (400 MHz,  $\text{CDCl}_3$ )  $\delta$ : 8.47 (d,  $J = 6.1$  Hz, 2H), 7.15 (d,  $J = 4.3$  Hz, 2H), 7.08 – 7.03 (m, 1H), 7.02 (d,  $J = 6.2$  Hz, 2H), 6.77 (d,  $J = 7.7$  Hz, 1H), 4.11 (t,  $J = 6.4$  Hz, 1H), 2.90–2.84 (m, 2H), 2.18 – 2.15 (m, 1H), 1.86 – 1.75 (m, 3H).  $^{13}\text{C}$  NMR (100 MHz,  $\text{CDCl}_3$ )  $\delta$ : 156.6, 149.3, 137.6, 137.1, 129.9, 129.2, 126.5, 125.9, 124.2, 44.9, 32.5, 29.5, 20.4.

These spectroscopic data correspond to reported data.<sup>[5]</sup>

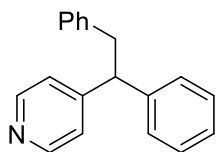

#### 4-(1,2-Diphenylethyl)pyridine (4c)

Yield: 38.9 mg, 75%; colorless oil;  $^1\text{H}$  NMR (400 MHz,  $\text{CDCl}_3$ )  $\delta$ : 8.44 (d,  $J = 5.7$  Hz, 2H), 7.28 (t,  $J = 7.3$  Hz, 2H), 7.22–7.13 (m, 6H), 7.09 (d,  $J = 6.1$  Hz, 2H), 6.99 (d,  $J = 6.3$  Hz, 2H), 4.21 (t,  $J = 7.9$  Hz, 1H), 3.42 – 3.27 (m, 2H).  $^{13}\text{C}$  NMR (100 MHz,  $\text{CDCl}_3$ )  $\delta$ : 153.2, 149.6, 142.5, 139.1, 128.9, 128.6, 128.2, 127.9, 126.8, 126.2, 123.4, 52.5, 41.3.

These spectroscopic data correspond to reported data.<sup>[2]</sup>

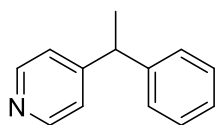

#### 4-(1-Phenylethyl)pyridine (4d)

Yield: 33.0 mg, 90%; colorless oil;  $^1\text{H}$  NMR (400 MHz,  $\text{CDCl}_3$ )  $\delta$ : 8.47 (d,  $J = 6.2$  Hz, 2H), 7.31 (t,  $J = 7.4$  Hz, 2H), 7.27 – 7.21 (m, 1H), 7.19 (d,  $J = 7.9$  Hz, 2H), 7.16 (d,  $J = 6.0$  Hz, 2H), 4.12 (q,  $J = 7.2$  Hz,



1H), 1.64 (d,  $J = 7.5$  Hz, 3H).  $^{13}\text{C}$  NMR (100 MHz,  $\text{CDCl}_3$ )  $\delta$ : 155.5, 149.2, 144.1, 128.6, 127.5, 126.6, 123.1, 44.1, 29.4, 20.9.

These spectroscopic data correspond to reported data.<sup>[5]</sup>

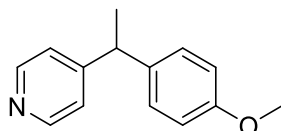

#### 4-(1-(4-Methoxyphenyl)ethyl)pyridine (4e)

Yield: 41.3 mg, 97%; colorless oil;  $^1\text{H}$  NMR (400 MHz,  $\text{CDCl}_3$ )  $\delta$ : 8.45 (d,  $J = 6.1$  Hz, 2H), 7.15 – 7.04 (m, 4H), 6.83 (d,  $J = 8.7$  Hz, 2H), 4.05 (q,  $J = 7.2$  Hz, 1H), 3.76 (s, 3H), 1.59 (d,  $J = 7.2$  Hz, 3H).  $^{13}\text{C}$  NMR (100 MHz,  $\text{CDCl}_3$ )  $\delta$ : 158.2, 155.6, 149.5, 136.4, 128.5, 122.9, 113.9, 55.2, 43.3, 21.1.

These spectroscopic data correspond to reported data.<sup>[6]</sup>

#### 4-(1-(*p*-tolyl)ethyl)pyridine (4f) and 4-(4-ethylbenzyl)pyridine (4f')

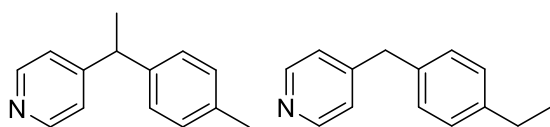

Yield: 33.5 mg, 85%; colorless oil;  $^1\text{H}$  NMR (400 MHz,  $\text{CDCl}_3$ )  $\delta$ : 8.47 (d,  $J = 6.2$  Hz, 2H), 7.15 (d,  $J = 6.2$  Hz, 2H), 7.10 (q,  $J = 8.1$  Hz, 4H), 4.09 (q,  $J = 7.2$  Hz, 1H), 3.94 (s, 0H), 2.63 (q,  $J = 7.6$  Hz, 0H), 2.32 (s, 3H), 1.61 (s, 3H), 1.23 (t,  $J = 7.6$  Hz, 0H).  $^{13}\text{C}$  NMR (100 MHz,  $\text{CDCl}_3$ )  $\delta$ : 155.6, 149.4, 141.3, 136.2, 129.3, 128.9, 128.2, 127.4, 124.2, 123.0, 43.8, 40.8, 29.4, 28.4, 21.0, 15.5.

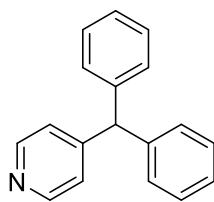

#### 4-Benzhydrylpyridine (4g)

Yield: 45.6 mg, 93%; colorless oil;  $^1\text{H}$  NMR (400 MHz,  $\text{CDCl}_3$ )  $\delta$ : 8.51 (d,  $J = 6.1$  Hz, 2H), 7.31 (t,  $J = 7.2$  Hz, 4H), 7.28 – 7.21 (m, 2H), 7.10 (d,  $J = 7.2$  Hz, 4H), 7.05 (d,  $J = 5.9$  Hz, 2H), 5.51 (s, 1H).  $^{13}\text{C}$  NMR (100 MHz,  $\text{CDCl}_3$ )  $\delta$ : 152.8, 149.7, 142.0, 129.3, 128.6, 126.8, 124.6, 56.2.

These spectroscopic data correspond to reported data.<sup>[2]</sup>

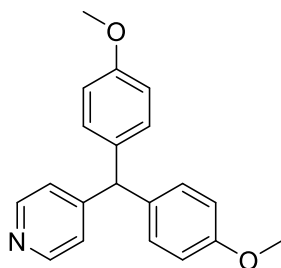

**4-(bis(4-Methoxyphenyl)methyl)pyridine (4h)**

Yield: 58.6 mg, 96%; colorless oil;  $^1\text{H NMR}$  (400 MHz,  $\text{CDCl}_3$ )  $\delta$ : 8.48 (d,  $J = 6.2$  Hz, 2H), 7.02 (d,  $J = 6.1$  Hz, 2H), 6.99 (d,  $J = 8.7$  Hz, 4H), 6.83 (d,  $J = 8.8$  Hz, 4H), 5.39 (s, 1H), 3.77 (s, 6H).  $^{13}\text{C NMR}$  (100 MHz,  $\text{CDCl}_3$ )  $\delta$ : 158.2, 153.4, 149.7, 134.5, 130.1, 124.4, 113.8, 55.2, 54.5. HRMS (ESI)  $m/z$  calcd for  $\text{C}_{20}\text{H}_{19}\text{NO}_2\text{Na}$  ( $\text{M} + \text{Na}$ ) $^+$  328.1308, found 328.1318.

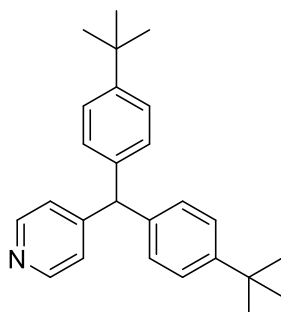

**4-(bis(4-*tert*-Butylphenyl)methyl)pyridine (4i)**

Yield: 67.2 mg, 94%; colorless oil;  $^1\text{H NMR}$  (400 MHz,  $\text{CDCl}_3$ )  $\delta$ : 8.49 (d,  $J = 4.7$  Hz, 2H), 7.32 (d,  $J = 7.5$  Hz, 4H), 7.07 (d,  $J = 5.2$  Hz, 2H), 7.03 (d,  $J = 8.0$  Hz, 4H), 5.43 (s, 1H), 1.31 (s, 18H).  $^{13}\text{C NMR}$  (100 MHz,  $\text{CDCl}_3$ )  $\delta$ : 153.3, 149.6, 149.5, 139.2, 128.9, 125.4, 124.6, 55.4, 34.4, 31.3. HRMS (ESI)  $m/z$  calcd for  $\text{C}_{26}\text{H}_{31}\text{NNa}$  ( $\text{M} + \text{Na}$ ) $^+$  380.2349, found 380.2355.

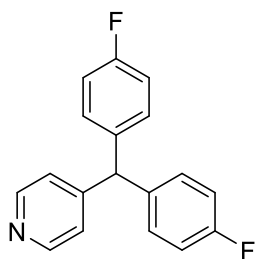

**4-(bis(4-Fluorophenyl)methyl)pyridine (4j)**

Yield: 37.7 mg, 67%; colorless oil;  $^1\text{H NMR}$  (400 MHz,  $\text{CDCl}_3$ )  $\delta$ : 8.52 (d,  $J = 6.1$  Hz, 2H), 7.03-7.00(m, 10H), 5.47 (s, 1H).  $^{13}\text{C NMR}$  (100 MHz,  $\text{CDCl}_3$ )  $\delta$ : 8.52 (d,  $J = 6.1$  Hz, 2H), 7.03-6.99 (m, 10H), 5.47 (s, 1H).  $^{19}\text{F NMR}$  (100 MHz,  $\text{CDCl}_3$ )  $\delta$ : 161.7 (d,  $J = 244.8$  Hz), 152.3, 149.9, 137.6 (d,  $J = 3.3$  Hz),

130.7 (d,  $J = 8.0$  Hz), 124.34, 115.5 (d,  $J = 21.2$  Hz), 54.6. HRMS (ESI)  $m/z$  calcd for  $C_{18}H_{13}F_2NNa$  ( $M+Na$ )<sup>+</sup> 304.0908, found 340.0913.

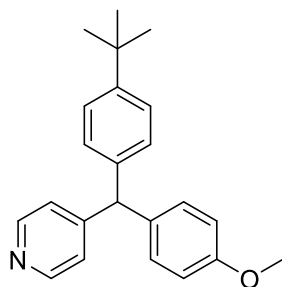

**4-((4-*tert*-Butyl)phenyl)(4-methoxyphenyl)methylpyridine (4k)**

Yield: 62.9 mg, 95%; colorless oil; <sup>1</sup>H NMR (400 MHz, CDCl<sub>3</sub>)  $\delta$ : 8.49 (d,  $J = 6.2$  Hz, 2H), 7.30 (d,  $J = 8.4$  Hz, 2H), 7.04 (d,  $J = 6.1$  Hz, 2H), 7.02 – 6.96 (m, 4H), 6.83 (d,  $J = 8.7$  Hz, 2H), 5.40 (s, 1H), 3.78 (s, 3H), 1.30 (s, 9H). <sup>13</sup>C NMR (100 MHz, CDCl<sub>3</sub>)  $\delta$ : 158.3, 153.4, 149.7, 149.5, 139.2, 134.5, 130.2, 128.8, 125.4, 124.5, 113.8, 55.20, 55.0, 34.4, 31.3. HRMS (ESI)  $m/z$  calcd for  $C_{23}H_{27}NO$  ( $M+H$ )<sup>+</sup> 332.2009, found 332.2015.

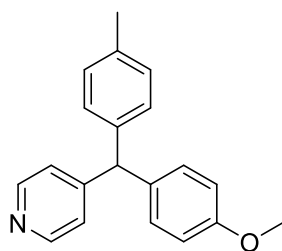

**4-((4-Methoxyphenyl)(*p*-tolyl)methyl)pyridine (4l)**

Yield: 52.0 mg, 90%; colorless oil; <sup>1</sup>H NMR (400 MHz, CDCl<sub>3</sub>)  $\delta$ : 8.48 (d,  $J = 6.1$  Hz, 2H), 7.10 (d,  $J = 7.8$  Hz, 2H), 7.03 (d,  $J = 6.1$  Hz, 2H), 6.99 (d,  $J = 8.6$  Hz, 2H), 6.96 (d,  $J = 7.9$  Hz, 2H), 6.83 (d,  $J = 8.7$  Hz, 2H), 5.40 (s, 1H), 3.78 (s, 3H), 2.32 (s, 3H). <sup>13</sup>C NMR (100 MHz, CDCl<sub>3</sub>)  $\delta$ : 158.3, 153.4, 149.7, 139.4, 136.4, 134.4, 130.2, 129.2, 129.1, 124.5, 113.9, 55.2, 55.0, 21.0. HRMS (ESI)  $m/z$  calcd for  $C_{20}H_{19}NONa$  ( $M+Na$ )<sup>+</sup> 312.1359, found 312.1367.

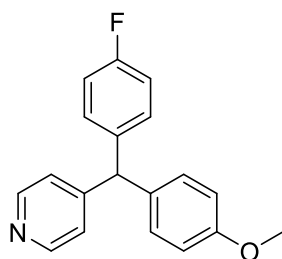

**4-((4-Fluorophenyl)(4-methoxyphenyl)methyl)pyridine (4m)**

Yield: 45.7 mg, 78%; colorless oil;  $^1\text{H NMR}$  (400 MHz,  $\text{CDCl}_3$ )  $\delta$ : 8.44 (d,  $J = 4.9$  Hz, 2H), 7.10 – 6.91 (m, 8H), 6.83 (d,  $J = 8.6$  Hz, 2H), 5.42 (s, 1H), 3.77 (s, 3H).  $^{13}\text{C NMR}$  (100 MHz,  $\text{CDCl}_3$ )  $\delta$ : 161.5 (d,  $J = 244.2$  Hz), 158.4, 152.9, 149.8, 138.1 (d,  $J = 3.8$  Hz), 133.9, 130.7, 130.6, 130.1, 124.4, 115.3 (d,  $J = 21.2$  Hz), 113.9, 55.2, 54.5. HRMS (ESI)  $m/z$  calcd for  $\text{C}_{19}\text{H}_{16}\text{FNONa}$  ( $\text{M} + \text{Na}$ ) $^+$  316.1108, found 316.1115.

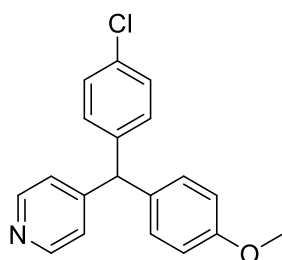

#### 4-((4-Chlorophenyl)(4-methoxyphenyl)methyl)pyridine (4n)

Yield: 43.9 mg, 71%; colorless oil;  $^1\text{H NMR}$  (400 MHz,  $\text{CDCl}_3$ )  $\delta$ : 8.51 (d,  $J = 4.7$  Hz, 2H), 7.27 (d,  $J = 8.1$  Hz, 2H), 7.06 – 6.94 (m, 6H), 6.85 (d,  $J = 8.2$  Hz, 2H), 5.42 (s, 1H), 3.79 (s, 3H).  $^{13}\text{C NMR}$  (100 MHz,  $\text{CDCl}_3$ )  $\delta$ : 158.5, 152.6, 149.9, 140.9, 133.6, 132.6, 130.5, 130.2, 128.7, 124.4, 114.0, 55.2, 54.7. HRMS (ESI)  $m/z$  calcd for  $\text{C}_{19}\text{H}_{16}\text{ClINa}$  ( $\text{M} + \text{Na}$ ) $^+$  332.0813, found 332.0819.

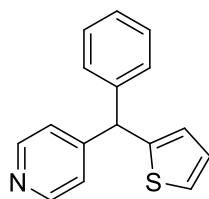

#### 4-(Phenyl(thiophen-2-yl)methyl)pyridine (4o)

Yield: 40.2 mg, 80%; colorless oil;  $^1\text{H NMR}$  (400 MHz,  $\text{CDCl}_3$ )  $\delta$ : 8.52 (d,  $J = 6.1$  Hz, 2H), 7.38 – 7.25 (m, 4H), 7.18 (d,  $J = 8.7$  Hz, 2H), 7.13 (d,  $J = 6.1$  Hz, 2H), 6.98 – 6.92 (m, 1H), 6.70 (d,  $J = 3.5$  Hz, 1H), 5.64 (s, 1H).  $^{13}\text{C NMR}$  (100 MHz,  $\text{CDCl}_3$ )  $\delta$ : 152.5, 149.9, 145.5, 142.0, 128.8, 128.7, 127.3, 126.8, 126.7, 125.1, 124.0, 51.4. HRMS (ESI)  $m/z$  calcd for  $\text{C}_{16}\text{H}_{14}\text{NS}$  ( $\text{M} + \text{H}$ ) $^+$  252.0841, found 252.0846.

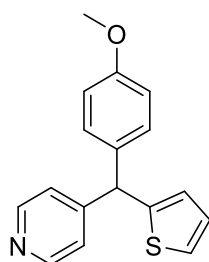

#### 4-((4-Methoxyphenyl)(thiophen-2-yl)methyl)pyridine (4p)

Yield: 48.9 mg, 87%; colorless oil;  $^1\text{H}$  NMR (400 MHz,  $\text{CDCl}_3$ )  $\delta$ : 8.51 (d,  $J = 6.1$  Hz, 2H), 7.22 (d,  $J = 5.1$  Hz, 1H), 7.14 – 7.07 (m, 4H), 6.96 – 6.91 (m, 1H), 6.85 (d,  $J = 8.7$  Hz, 2H), 6.68 (d,  $J = 3.5$  Hz, 1H), 5.58 (s, 1H), 3.78 (s, 3H).  $^{13}\text{C}$  NMR (100 MHz,  $\text{CDCl}_3$ )  $\delta$ : 158.7, 152.8, 149.9, 146.1, 134.3, 129.8, 126.8, 126.6, 125.0, 123.9, 114.0, 55.3, 50.7. HRMS (ESI)  $m/z$  calcd for  $\text{C}_{17}\text{H}_{15}\text{NOSNa}$  ( $\text{M} + \text{Na}$ ) $^+$  304.0767, found 304.0775.

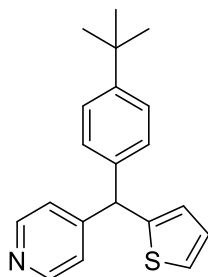

#### 4-((4-*tert*-Butyl)phenyl)(thiophen-2-yl)methyl)pyridine (4q)

Yield: 54.7 mg, 89%; colorless oil;  $^1\text{H}$  NMR (400 MHz,  $\text{CDCl}_3$ )  $\delta$ : 8.51 (d,  $J = 6.1$  Hz, 2H), 7.33 (d,  $J = 8.4$  Hz, 2H), 7.22 (d,  $J = 5.1$  Hz, 1H), 7.14 (d,  $J = 6.0$  Hz, 2H), 7.10 (d,  $J = 8.3$  Hz, 2H), 6.99 – 6.91 (m, 1H), 6.71 (d,  $J = 3.6$  Hz, 1H), 5.60 (s, 1H), 1.30 (s, 9H).  $^{13}\text{C}$  NMR (100 MHz,  $\text{CDCl}_3$ )  $\delta$ : 152.9, 150.1, 149.6, 145.8, 138.8, 128.3, 126.7, 126.6, 125.5, 125.0, 124.0, 51.0, 34.5, 31.3. HRMS (ESI)  $m/z$  calcd for  $\text{C}_{20}\text{H}_{21}\text{NSNa}$  ( $\text{M} + \text{Na}$ ) $^+$  330.1287, found 330.1298.

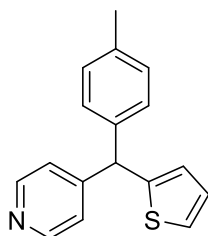

#### 4-(Thiophen-2-yl(*p*-tolyl)methyl)pyridine (4r)

Yield: 44.0 mg, 83%; colorless oil;  $^1\text{H}$  NMR (400 MHz,  $\text{CDCl}_3$ )  $\delta$ : 8.50 (d,  $J = 6.2$  Hz, 2H), 7.22 (dd,  $J = 5.1, 1.2$  Hz, 1H), 7.14-7.12 (m, 4H), 7.06 (d,  $J = 8.1$  Hz, 2H), 6.94 (dd,  $J = 5.2, 3.5$  Hz, 1H), 6.69 (d,  $J = 3.5$  Hz, 1H), 5.60 (s, 1H), 2.33 (s, 3H).  $^{13}\text{C}$  NMR (100 MHz,  $\text{CDCl}_3$ )  $\delta$ : 153.0, 149.5, 145.7, 139.0, 137.0, 129.3, 128.6, 126.7, 126.6, 125.0, 124.0, 51.0, 21.0. HRMS (ESI)  $m/z$  calcd for  $\text{C}_{17}\text{H}_{16}\text{NS}$  ( $\text{M} + \text{H}$ ) $^+$  266.0998, found 266.1002.

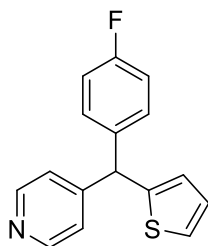

#### 4-((4-Fluorophenyl)(thiophen-2-yl)methyl)pyridine (4s)

Yield: 37.1 mg, 69%; colorless oil;  $^1\text{H NMR}$  (400 MHz,  $\text{CDCl}_3$ )  $\delta$ : 8.53 (d,  $J = 6.2$  Hz, 2H), 7.24 (d,  $J = 3.9$  Hz, 1H), 7.19 – 7.08 (m, 4H), 7.01 (t,  $J = 8.6$  Hz, 2H), 6.97 – 6.92 (m, 1H), 6.68 (d,  $J = 3.1$  Hz, 1H), 5.62 (s, 1H).  $^{13}\text{C NMR}$  (100 MHz,  $\text{CDCl}_3$ )  $\delta$ : 161.9 (d,  $J = 245.1$  Hz), 152.4, 149.8, 145.3, 137.8 (d,  $J = 3.4$  Hz), 130.3 (d,  $J = 8.0$  Hz), 126.9, 126.8, 125.3, 123.9, 115.6 (d,  $J = 21.3$  Hz), 50.7. HRMS (ESI)  $m/z$  calcd for  $\text{C}_{16}\text{H}_{12}\text{FNSNa}$  ( $\text{M} + \text{Na}$ ) $^+$  292.0567, found 292.0575.

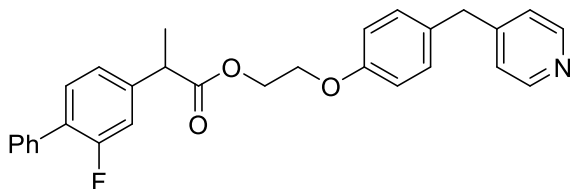

#### 2-(4-(Pyridin-4-ylmethyl)phenoxy)ethyl 2-(2-fluoro-[1,1'-biphenyl]-4-yl)propanoate (5a)

Yield: 62.8 mg, 69%; colorless oil;  $^1\text{H NMR}$  (400 MHz,  $\text{CDCl}_3$ )  $\delta$ : 8.47 (d,  $J = 6.1$  Hz, 2H), 7.51 (d,  $J = 8.3$  Hz, 2H), 7.43 (t,  $J = 7.4$  Hz, 2H), 7.39 – 7.32 (m, 2H), 7.17 – 7.10 (m, 2H), 7.10 – 7.00 (m, 4H), 6.81 (d,  $J = 8.6$  Hz, 2H), 4.51 – 4.39 (m, 2H), 4.13 (t,  $J = 4.7$  Hz, 2H), 3.89 (s, 2H), 3.80 (q,  $J = 7.2$  Hz, 1H), 1.54 (d,  $J = 7.1$  Hz, 3H).  $^{13}\text{C NMR}$  (100 MHz,  $\text{CDCl}_3$ )  $\delta$ : 173.9, 159.6 (d,  $J = 246.8$  Hz), 157.2, 150.4, 149.7, 141.5 (d,  $J = 7.8$  Hz), 135.41, 131.5, 130.7 (d,  $J = 4.0$  Hz), 130.0, 128.9 (d,  $J = 2.8$  Hz), 128.4, 127.6, 124.0, 123.5 (d,  $J = 3.3$  Hz), 115.3 (d,  $J = 23.5$  Hz), 114.8, 99.9, 65.8, 63.2, 44.9, 40.3, 18.3. HRMS (ESI)  $m/z$  calcd for  $\text{C}_{29}\text{H}_{28}\text{FNO}_3$  ( $\text{M} + \text{H}$ ) $^+$  456.1969, found 456.1976.

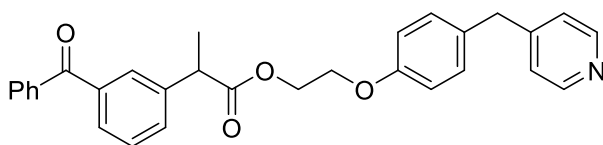

#### 2-(4-(Pyridin-4-ylmethyl)phenoxy)ethyl 2-(3-benzoylphenyl)propanoate (5b)

Yield: 53.0 mg, 57%; colorless oil;  $^1\text{H NMR}$  (400 MHz,  $\text{CDCl}_3$ )  $\delta$ : 8.47 (d,  $J = 6.0$  Hz, 2H), 7.80 – 7.73 (m, 3H), 7.65 (d,  $J = 7.7$  Hz, 1H), 7.61 – 7.51 (m, 2H), 7.46 (t,  $J = 7.6$  Hz, 2H), 7.40 (t,  $J = 7.7$  Hz, 1H), 7.06 (t,  $J = 7.4$  Hz, 4H), 6.78 (d,  $J = 8.6$  Hz, 2H), 4.47 – 4.36 (m, 2H), 4.11 (t,  $J = 4.8$  Hz, 2H), 3.88 (s, 2H), 3.84 (q,  $J = 7.2$  Hz, 1H), 1.53 (d,  $J = 7.2$  Hz, 3H).  $^{13}\text{C NMR}$  (100 MHz,  $\text{CDCl}_3$ )  $\delta$ : 196.4, 174.0,

157.1, 150.4, 149.7, 140.6, 137.8, 137.4, 132.5, 131.5, 131.4, 130.0, 129.2, 129.0, 128.5, 128.3, 124.0, 114.8, 65.8, 63.2, 45.2, 40.3, 18.4. HRMS (ESI)  $m/z$  calcd for  $C_{30}H_{29}NO_4$  ( $M+H$ )<sup>+</sup> 466.2013, found 466.2018.

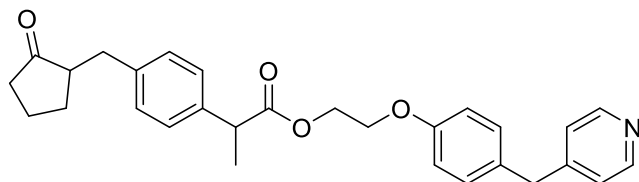

**2-(4-(Pyridin-4-ylmethyl)phenoxy)ethyl 2-(4-((2-oxocyclopentyl)methyl)phenyl)propanoate (5c)**

Yield: 55.8 mg, 61%; colorless oil; <sup>1</sup>H NMR (400 MHz, CDCl<sub>3</sub>) δ: <sup>1</sup>H NMR (400 MHz, Chloroform-*d*) δ 8.47 (d,  $J = 5.9$  Hz, 2H), 7.20 (d,  $J = 7.8$  Hz, 2H), 7.12 – 7.02 (m, 6H), 6.80 (d,  $J = 8.5$  Hz, 2H), 4.45 – 4.34 (m, 2H), 4.12-4.08 (m, 2H), 3.90 (s, 2H), 3.72 (q,  $J = 7.1$  Hz, 1H), 3.09 (dd,  $J = 13.9, 4.0$  Hz, 1H), 2.47 (dd,  $J = 13.9, 9.5$  Hz, 1H), 2.31-2.27 (m, 2H), 2.14 – 2.02 (m, 3H), 1.96-1.89 (m, 1H), 1.73-1.68 (m, 1H), 1.48 (d,  $J = 7.2$  Hz, 3H). <sup>13</sup>C NMR (100 MHz, CDCl<sub>3</sub>) δ: 220.2, 174.6, 157.3, 150.4, 149.8, 138.9, 138.1, 131.5, 130.1, 129.1, 127.5, 124.1, 114.9, 65.9, 63.0, 51.0, 45.0, 40.4, 38.2, 35.2, 29.2, 20.5, 18.5. HRMS (ESI)  $m/z$  calcd for  $C_{29}H_{33}NO_4$  ( $M+H$ )<sup>+</sup> 458.2326, found 458.2328.

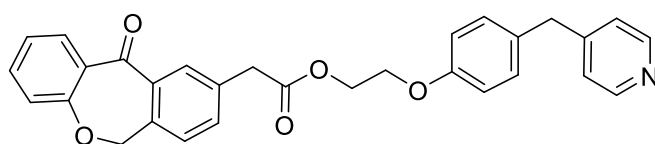

**2-(4-(Pyridin-4-ylmethyl)phenoxy)ethyl 2-(11-oxo-6,11-dihydrodibenzo[b,e]oxepin-9-yl)acetate (5d)**

Yield: 52.7 mg, 55%; colorless oil; <sup>1</sup>H NMR (400 MHz, CDCl<sub>3</sub>) δ: 8.48 (d,  $J = 6.1$  Hz, 2H), 8.11 (d,  $J = 2.4$  Hz, 1H), 7.87 (d,  $J = 7.6$  Hz, 1H), 7.56 (t,  $J = 7.4$  Hz, 1H), 7.46 (t,  $J = 7.5$  Hz, 1H), 7.42 (dd,  $J = 8.4, 2.4$  Hz, 1H), 7.36 (d,  $J = 7.4$  Hz, 1H), 7.08 (dd,  $J = 7.1, 5.2$  Hz, 4H), 7.00 (d,  $J = 8.4$  Hz, 1H), 6.84 (d,  $J = 8.5$  Hz, 2H), 5.17 (s, 2H), 4.45 (t,  $J = 4.6$  Hz, 2H), 4.16 (t,  $J = 4.6$  Hz, 2H), 3.90 (s, 2H), 3.68 (s, 2H). <sup>13</sup>C NMR (100 MHz, CDCl<sub>3</sub>) δ: 190.8, 171.4, 160.5, 157.2, 150.6, 149.6, 140.4, 136.3, 135.5, 132.8, 132.5, 131.4, 130.1, 129.5, 129.3, 127.8, 127.5, 125.1, 124.1, 121.1, 114.9, 73.6, 65.9, 63.2, 40.3, 40.0. HRMS (ESI)  $m/z$  calcd for  $C_{30}H_{25}NO_5Na$  ( $M+Na$ )<sup>+</sup> 502.1625, found 502.1628.

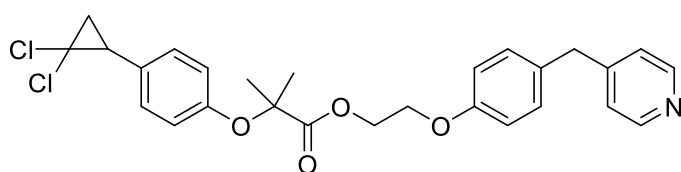

**2-(4-(Pyridin-4-ylmethyl)phenoxy)ethyl  
methylpropanoate (5e)**

**2-(4-(2,2-dichlorocyclopropyl)phenoxy)-2-**

Yield: 48.9 mg, 49%; colorless oil;  $^1\text{H NMR}$  (400 MHz,  $\text{CDCl}_3$ )  $\delta$ : 8.47 (d,  $J = 6.1$  Hz, 2H), 7.07 (m, 4H), 6.99 (d,  $J = 8.6$  Hz, 2H), 6.86 – 6.73 (m, 4H), 4.56 – 4.46 (t,  $J = 4.7$  Hz, 2H), 4.10 (t,  $J = 4.7$  Hz, 2H), 3.90 (s, 2H), 2.76 – 2.71 (m, 1H), 1.89 – 1.84 (m, 1H), 1.67 (t,  $J = 7.8$  Hz, 2H), 1.59 (s, 6H).  $^{13}\text{C NMR}$  (100 MHz,  $\text{CDCl}_3$ )  $\delta$ : 174.1, 157.1, 154.8, 150.4, 149.7, 131.5, 130.0, 129.6, 128.2, 124.1, 118.8, 114.8, 79.2, 77.3, 65.6, 63.5, 60.8, 40.3, 34.7, 25.7, 25.4, 25.4. HRMS (ESI)  $m/z$  calcd for  $\text{C}_{27}\text{H}_{28}\text{Cl}_2\text{NO}_4$  ( $\text{M} + \text{H}$ ) $^+$  500.1390, found 500.1400.

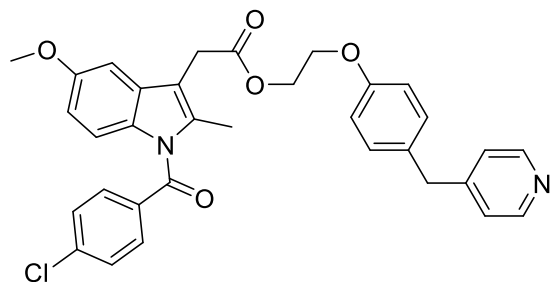

**2-(4-(Pyridin-4-ylmethyl)phenoxy)ethyl 2-(1-(4-chlorobenzoyl)-5-methoxy-2-methyl-1H-indol-3-yl)acetate (5f)**

Yield: 43.2 mg, 38%; colorless oil;  $^1\text{H NMR}$  (400 MHz,  $\text{CDCl}_3$ )  $\delta$ : 8.37 (d,  $J = 6.1$  Hz, 2H), 7.42 (d,  $J = 8.6$  Hz, 2H), 7.35 (d,  $J = 8.5$  Hz, 2H), 7.09 – 7.00 (m, 5H), 6.71 (d,  $J = 8.5$  Hz, 2H), 6.65 (dd,  $J = 9.1$ , 2.6 Hz, 1H), 6.47 (d,  $J = 9.1$  Hz, 1H), 4.44 (t,  $J = 4.6$  Hz, 2H), 4.40 (s, 2H), 4.10 (t,  $J = 4.6$  Hz, 2H), 3.80 (s, 2H), 3.79 (s, 3H), 2.28 (s, 3H).  $^{13}\text{C NMR}$  (100 MHz,  $\text{CDCl}_3$ )  $\delta$ : 170.5, 168.0, 156.2, 156.1, 149.6, 147.9, 139.6, 136.3, 132.9, 131.1, 130.6, 130.0, 130.0, 129.1, 123.6, 114.9, 114.7, 114.4, 112.7, 101.5, 65.9, 63.6, 55.7, 31.3, 30.3, 20.5. HRMS (ESI)  $m/z$  calcd for  $\text{C}_{33}\text{H}_{29}\text{ClN}_2\text{O}_5\text{Na}$  ( $\text{M} + \text{Na}$ ) $^+$  591.1657, found 591.1659.

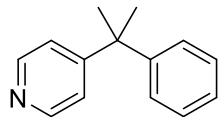

**4-(2-phenylpropan-2-yl)pyridine (6)**

Yield: 21.3 mg, 54%; colorless oil;  $^1\text{H NMR}$  (400 MHz,  $\text{CDCl}_3$ )  $\delta$ : 8.47 (d,  $J = 6.2$  Hz, 2H), 7.29 (t,  $J = 7.2$  Hz, 2H), 7.24 – 7.17 (m, 3H), 7.14 (d,  $J = 6.3$  Hz, 2H), 1.67 (s, 6H).  $^{13}\text{C NMR}$  (100 MHz,  $\text{CDCl}_3$ )  $\delta$ : 159.7, 149.4, 148.6, 128.2, 126.6, 126.2, 122.1, 42.9, 29.9.

These spectroscopic data correspond to reported data.<sup>[7]</sup>



## 5 Reference

- [1] E. D. Nacsa, D. W. C. MacMillan, *J. Am. Chem. Soc.* 2018, *140*, 3322.
- [2] J. Shi, T. Yuan, M. Zheng, X. Wang, *ACS Catal.* **2021**, *11*, 3040.
- [3] J. Wu, D. Wang, X. Chen, Q. Gui, H. Li, Z. Tan, G. Huang, G. Wang, *Org. Biomol. Chem.* **2017**, *15*, 7509.
- [4] B. Lipp, A. Lipp, H. Detert, T. Opatz, *Org. Lett.* **2017**, *19*, 2054.
- [5] L. Gao, G. Wang, J. Cao, H. Chen, Y. Gu, X. Liu, X. Cheng, J. Ma, S. Li, *ACS Catal.* **2019**, *9*, 10142.
- [6] T. Andou, Y. Saga, H. Komai, S. Matsunaga, M. Kanai, *Angew. Chem. Int. Ed.* **2013**, *52*, 3213.
- [7] L. Gao, G. Wang, J. Cao, H. Chen, Y. Gu, X. Liu, X. Cheng, J. Ma, Shuhua Li, *ACS Catal.* 2019, **9**, 10142.

## 6. Spectra

### 4-(4-Methoxybenzyl)pyridine (3a)

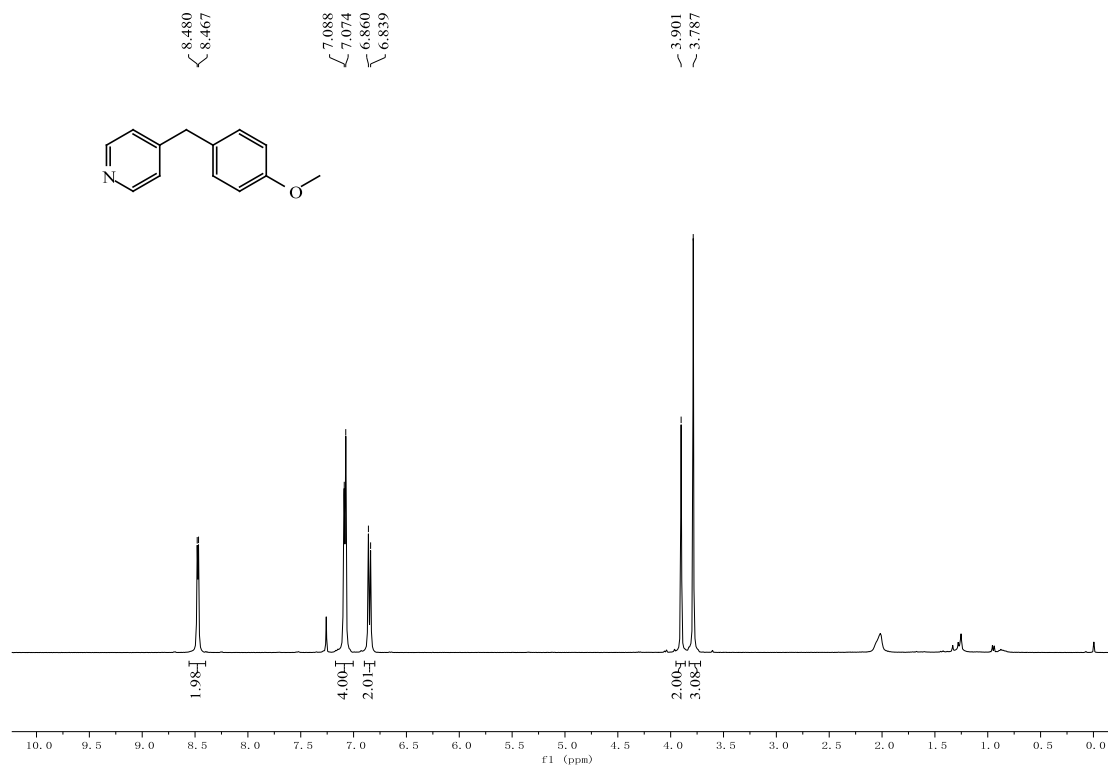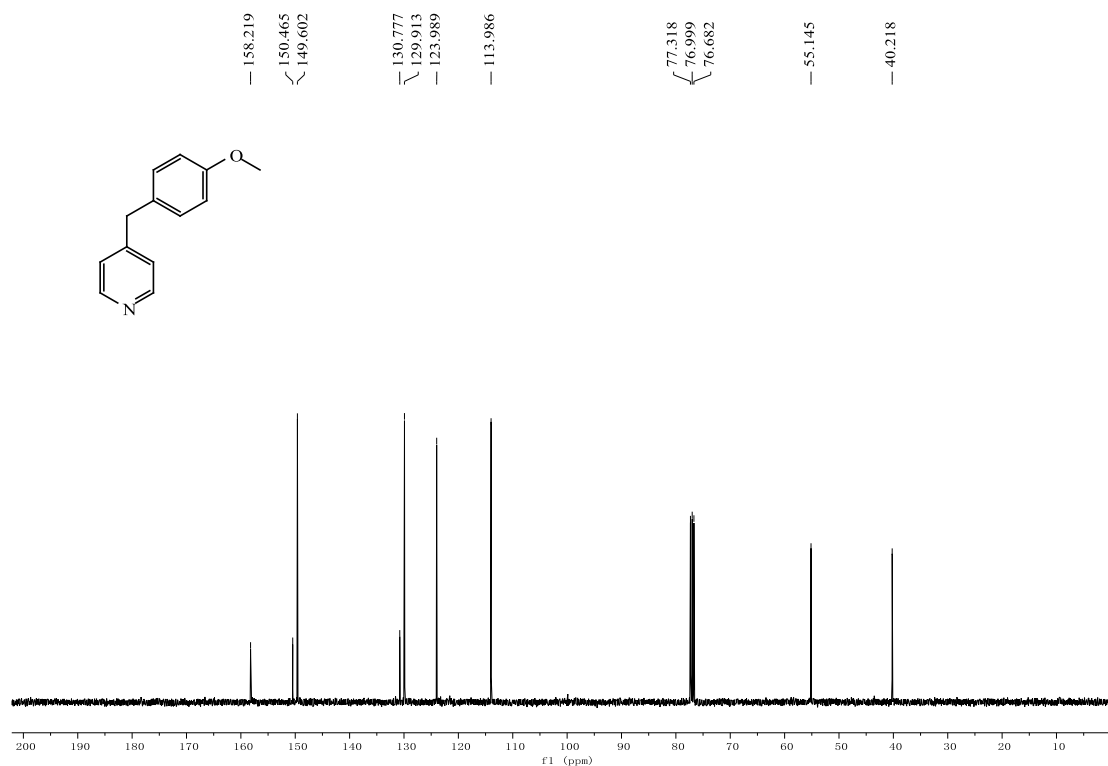

### 4-(4-Isopropoxybenzyl)pyridine (3b)

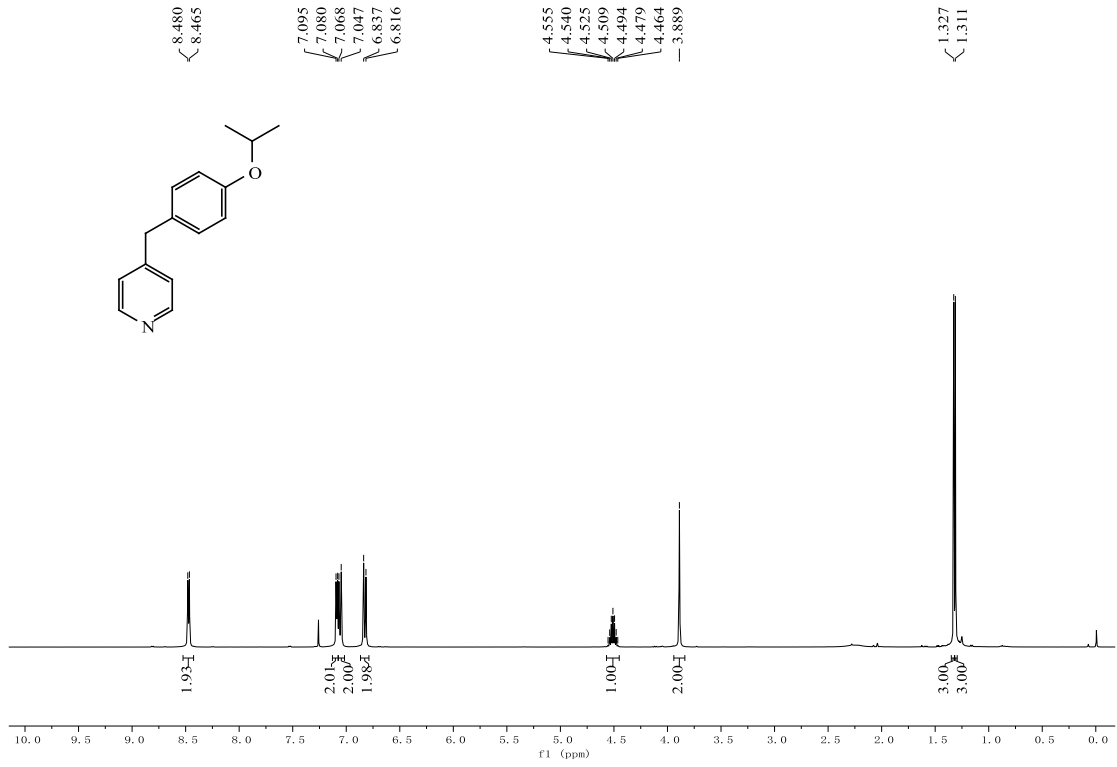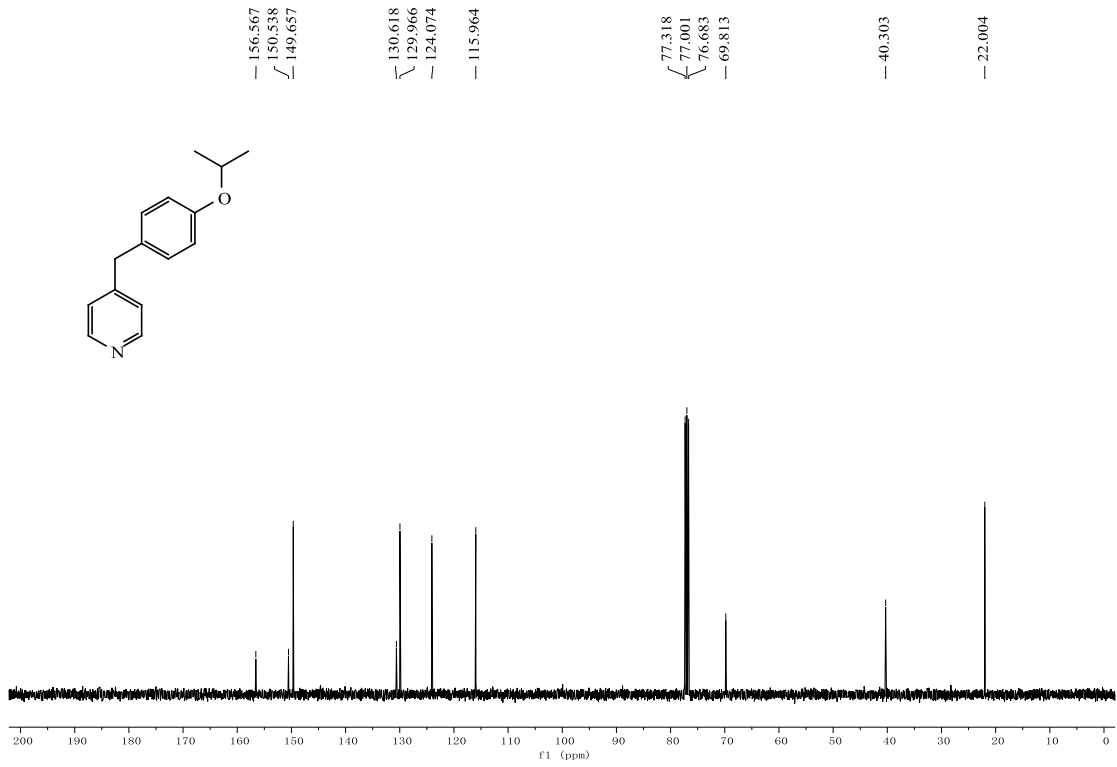

### 4-(4-(*tert*-Butyl)benzyl)pyridine (3c)

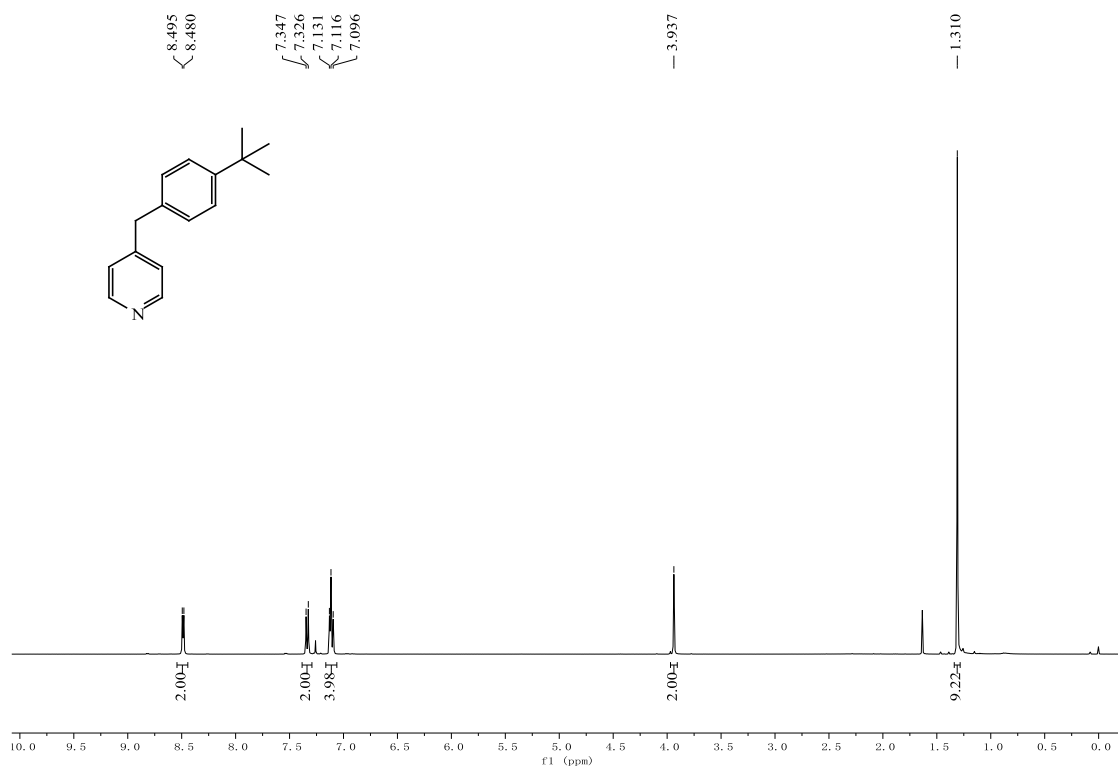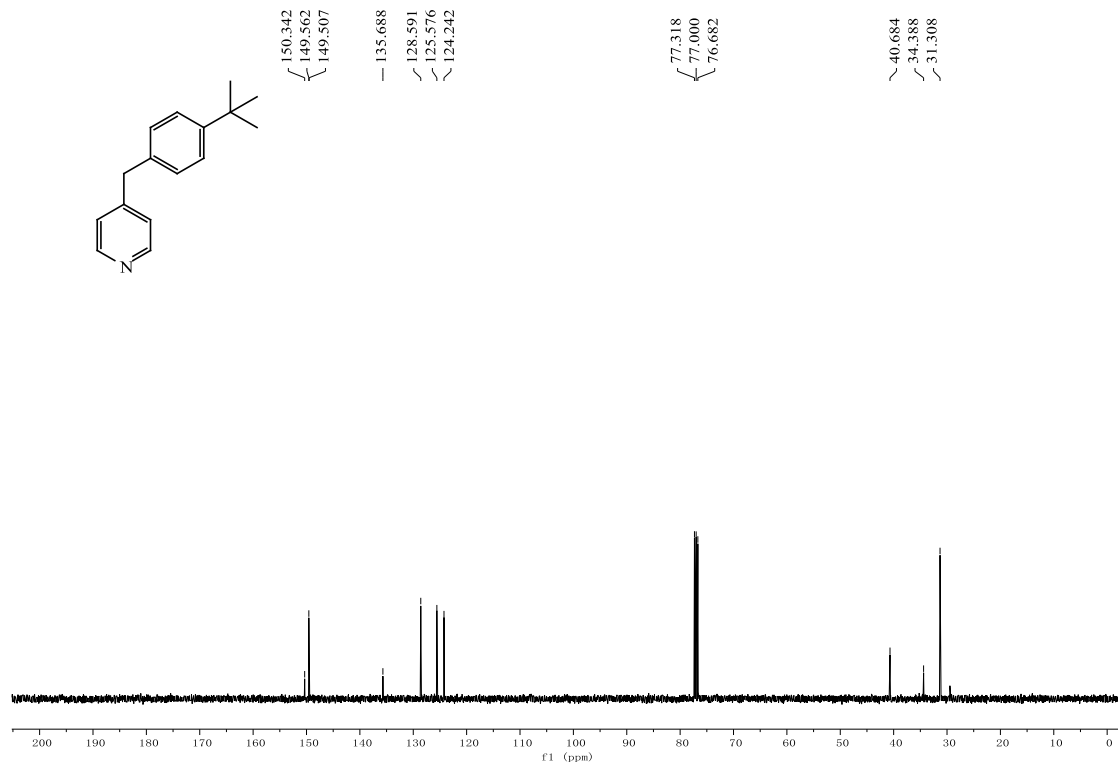

### 4-(4-Methylbenzyl)pyridine (3d)

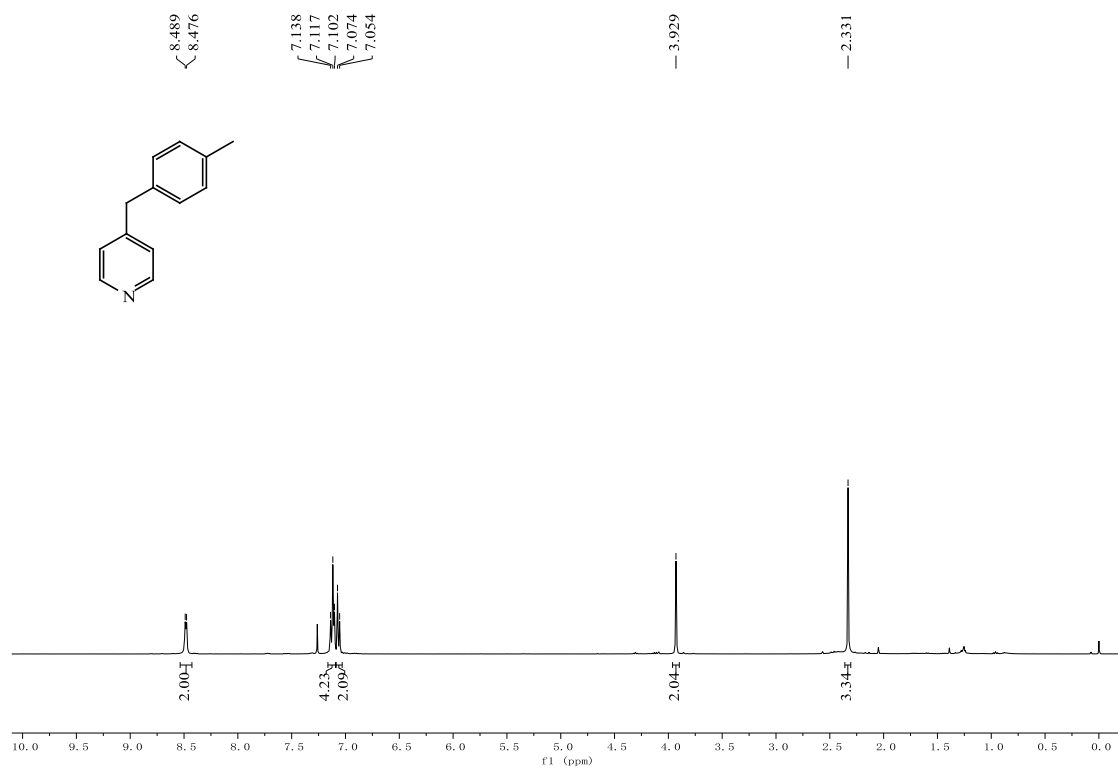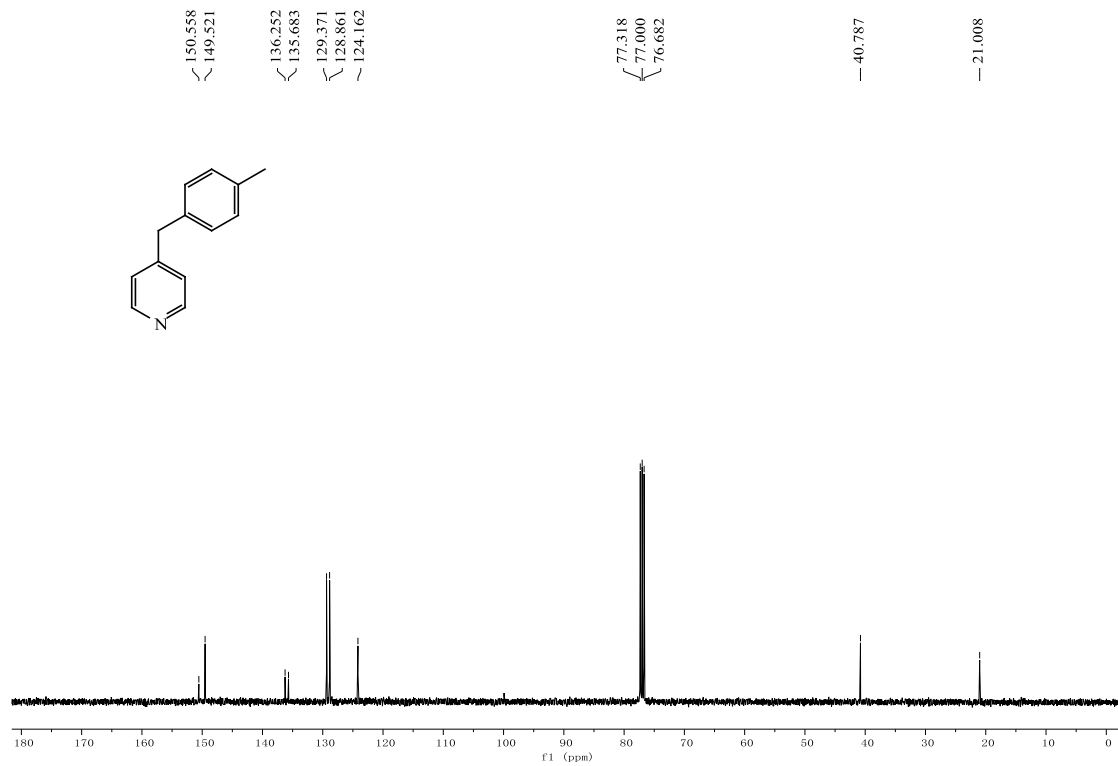

### 4-Benzylpyridine (3e)

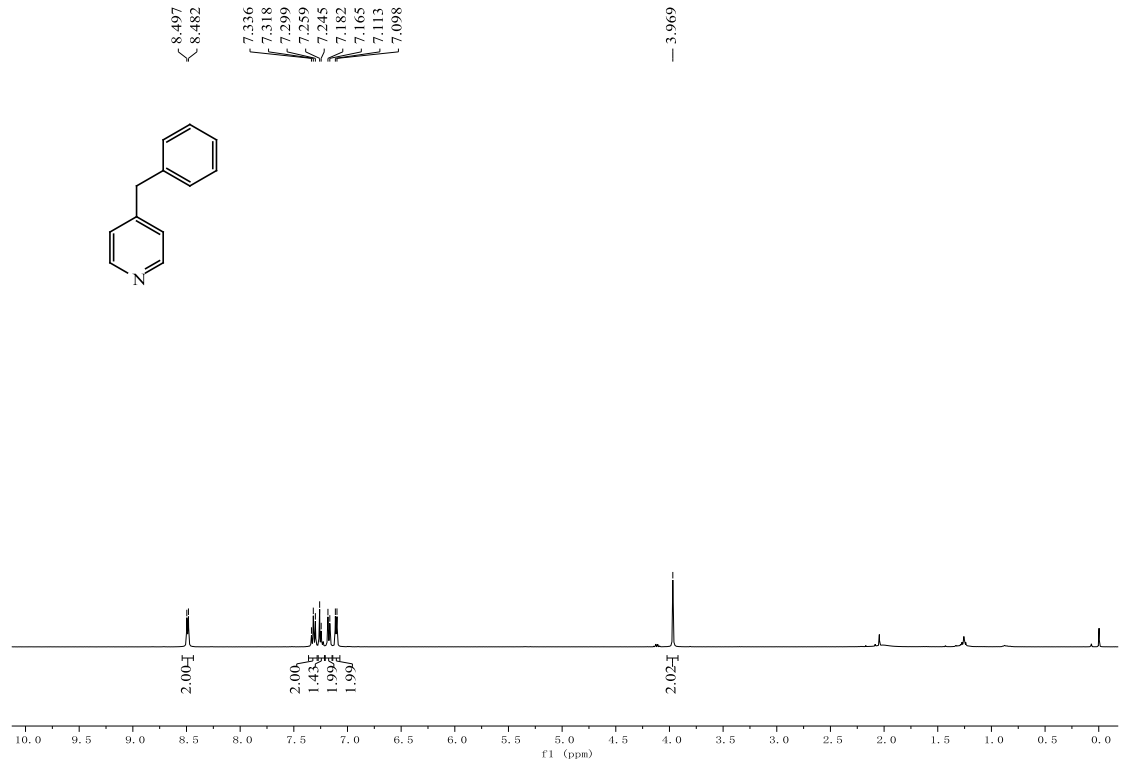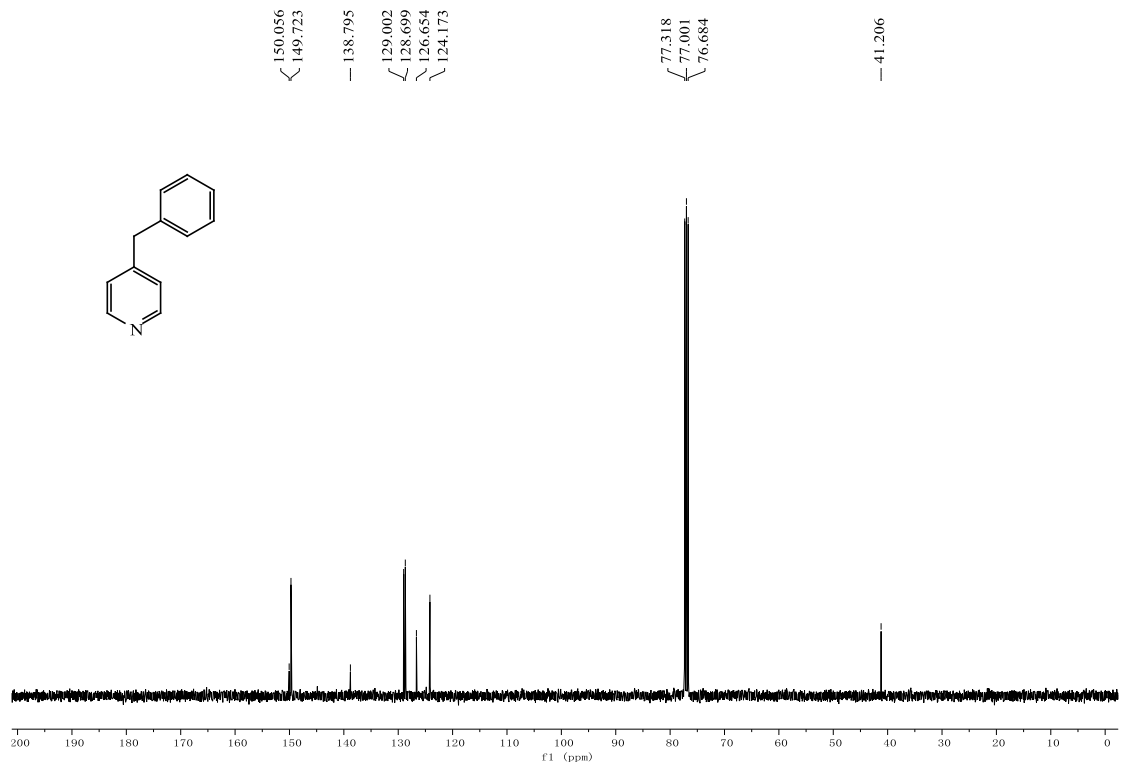

### 4-(4-Fluorobenzyl)pyridine (3f)

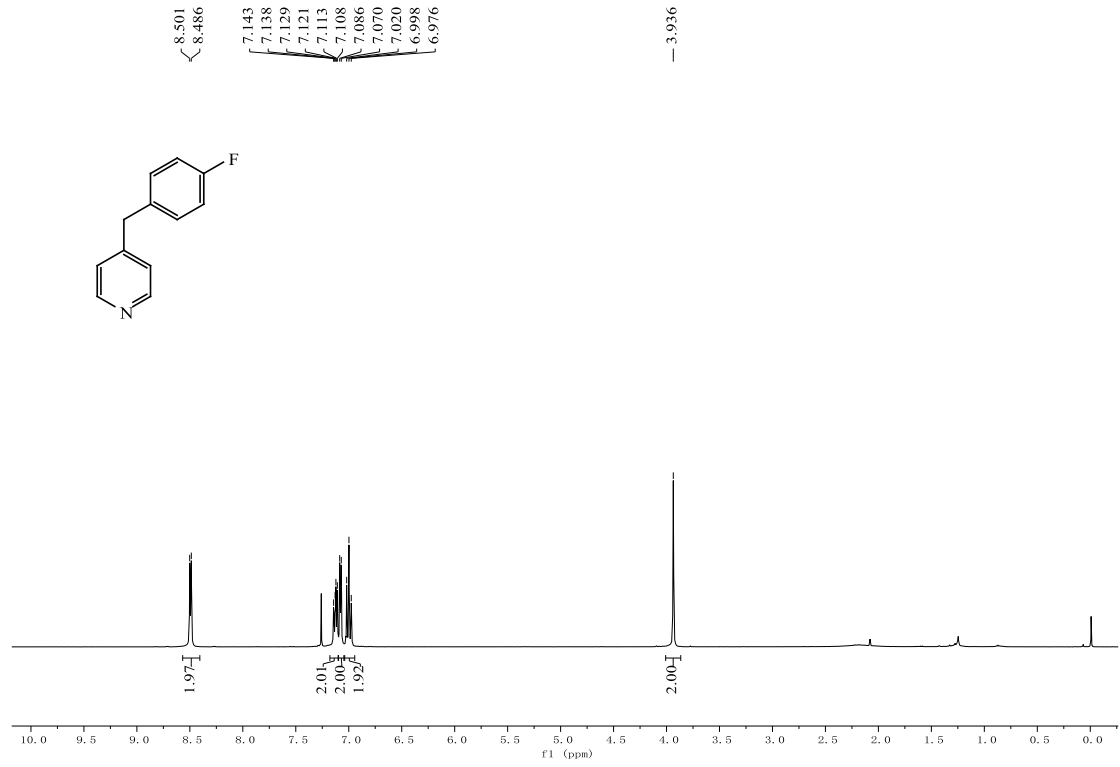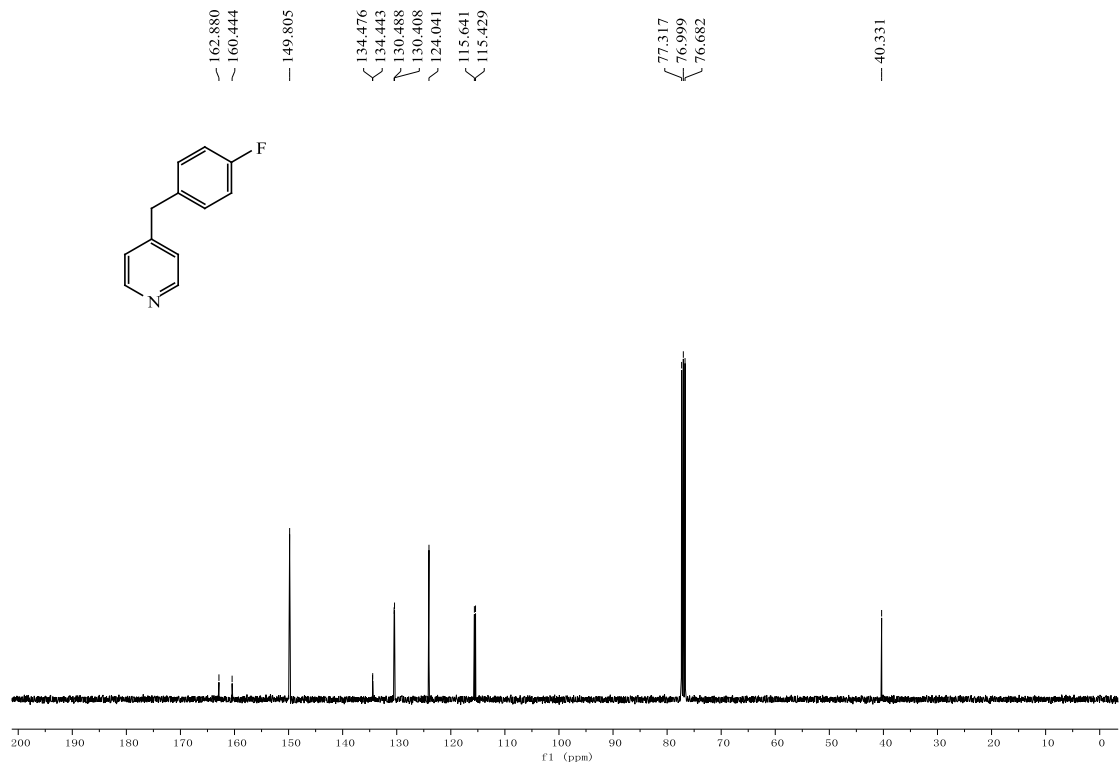

### 4-(4-Chlorobenzyl)pyridine (3g)

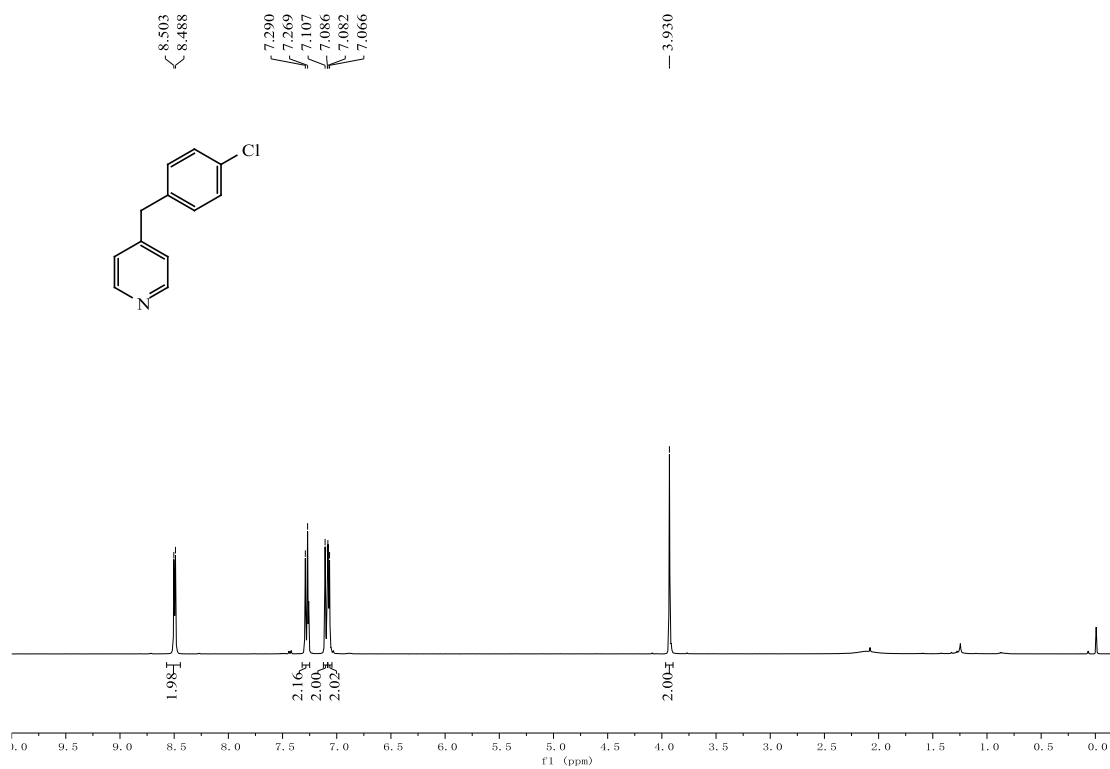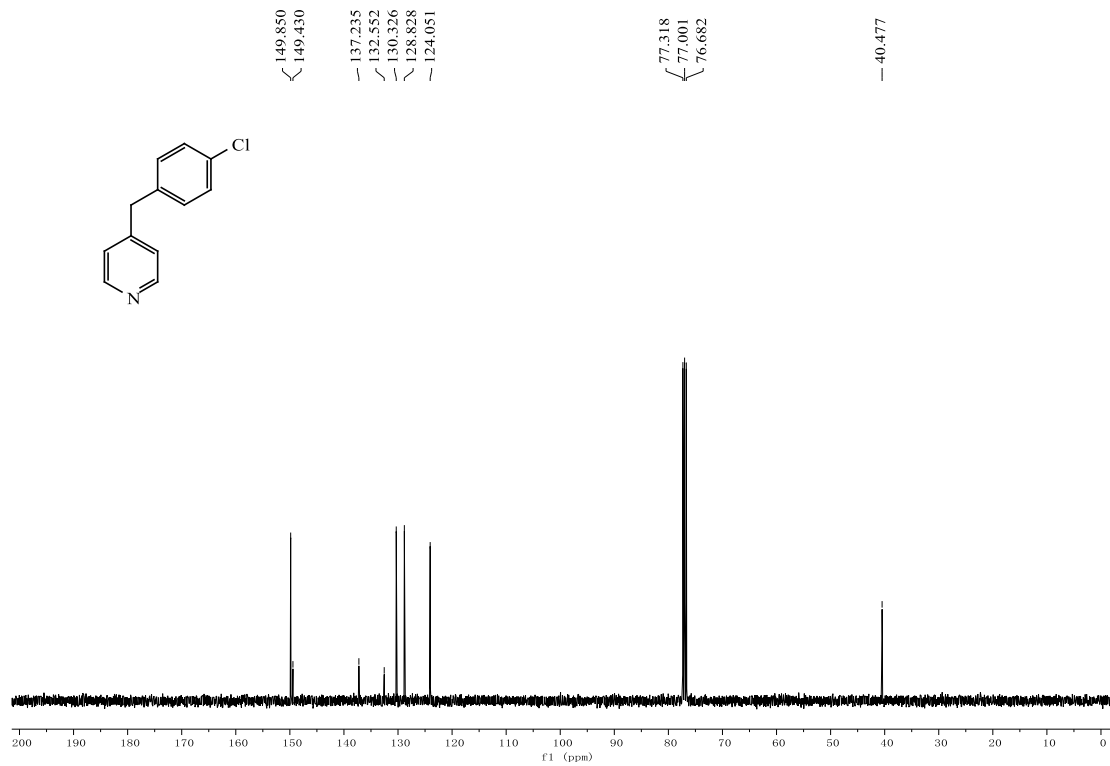



### 4-(3-Methylbenzyl)pyridine (3i)

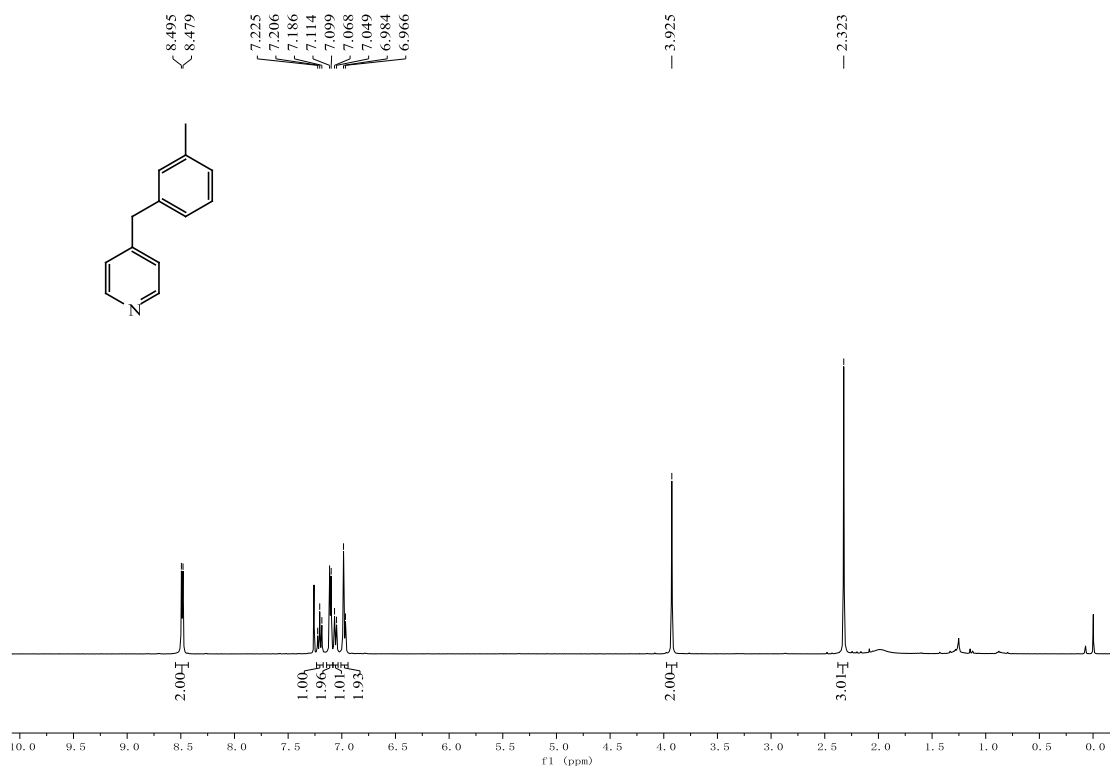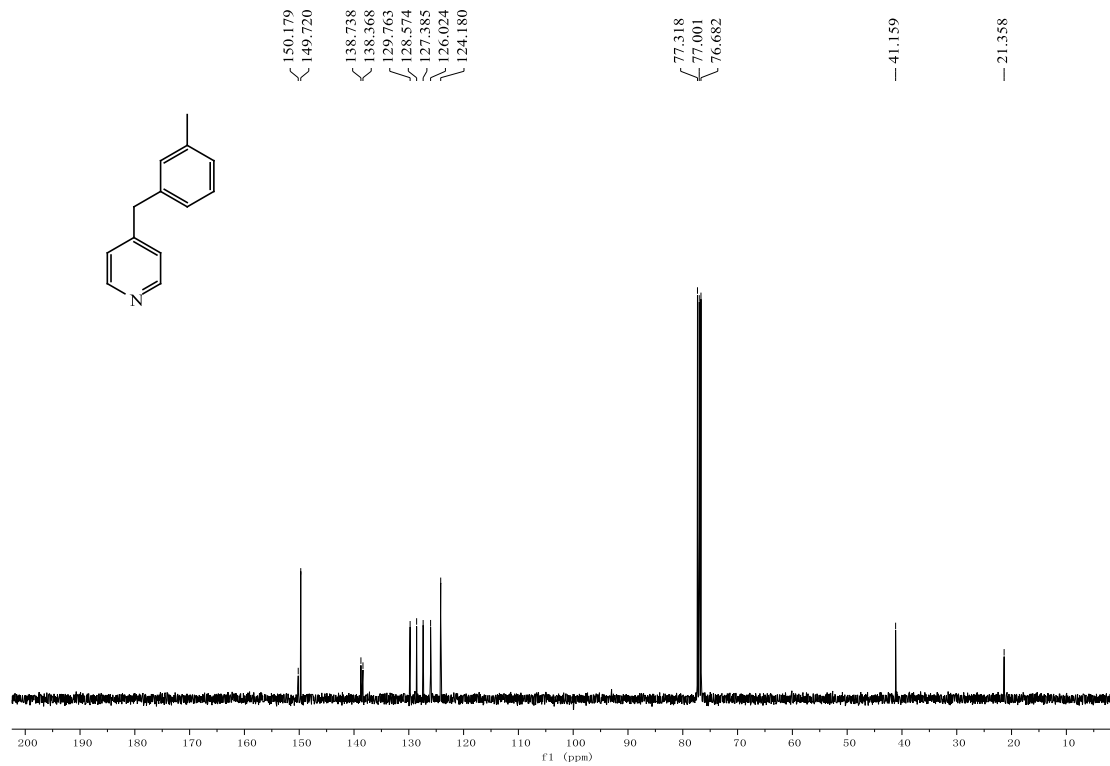

### 4-(3-Chlorobenzyl)pyridine (3j)

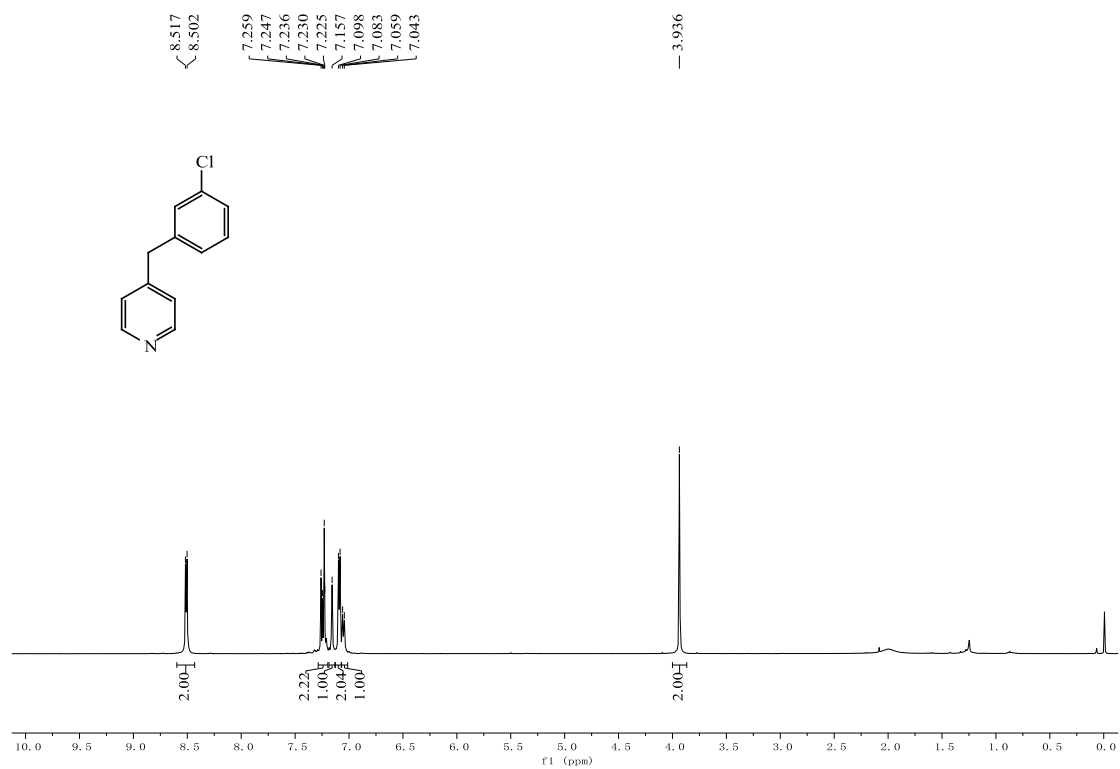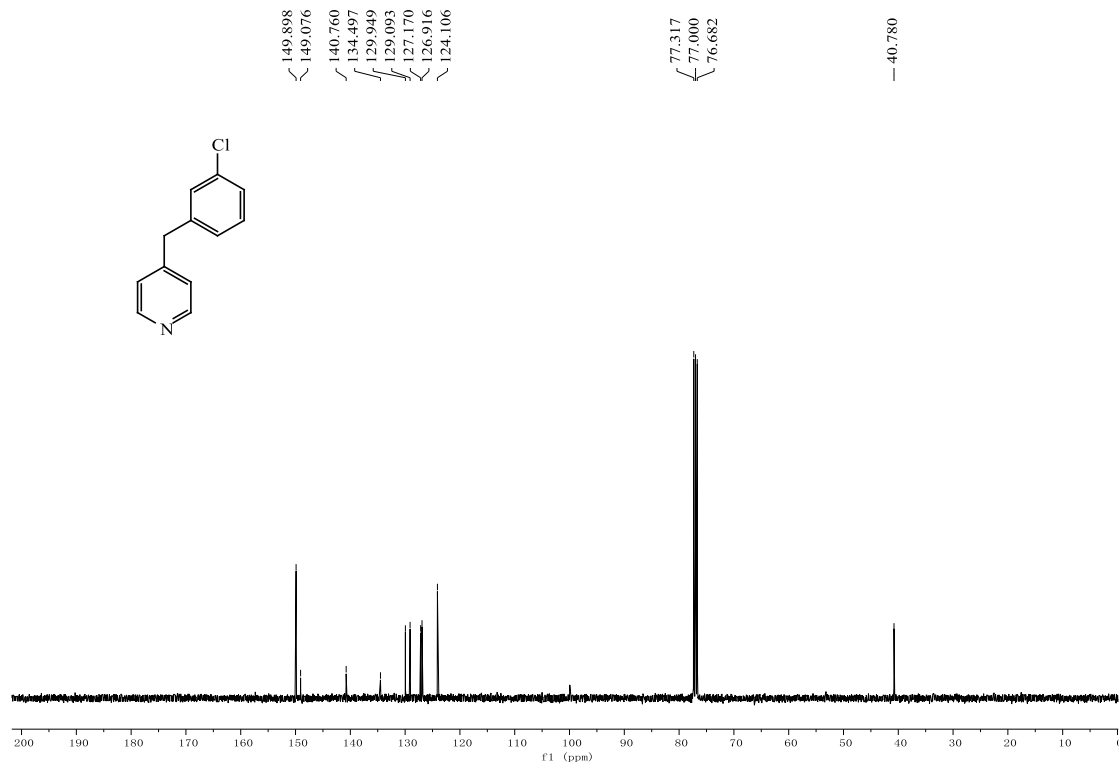

### 4-(2-Methoxybenzyl)pyridine (3k)

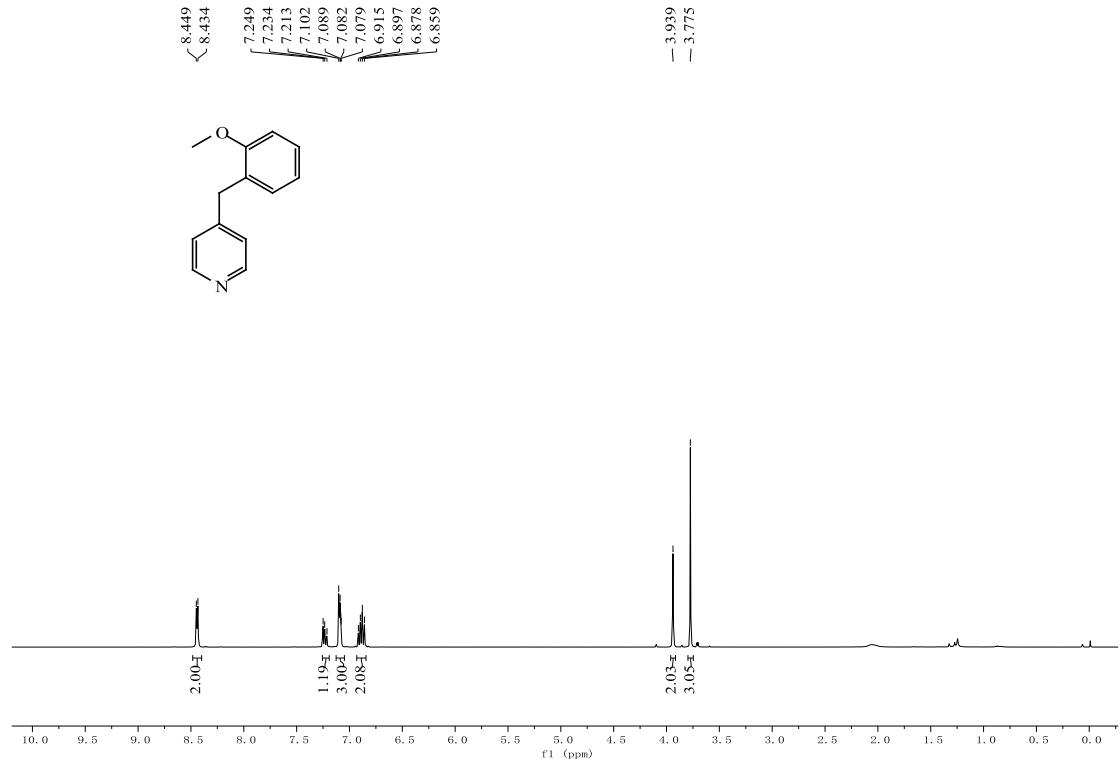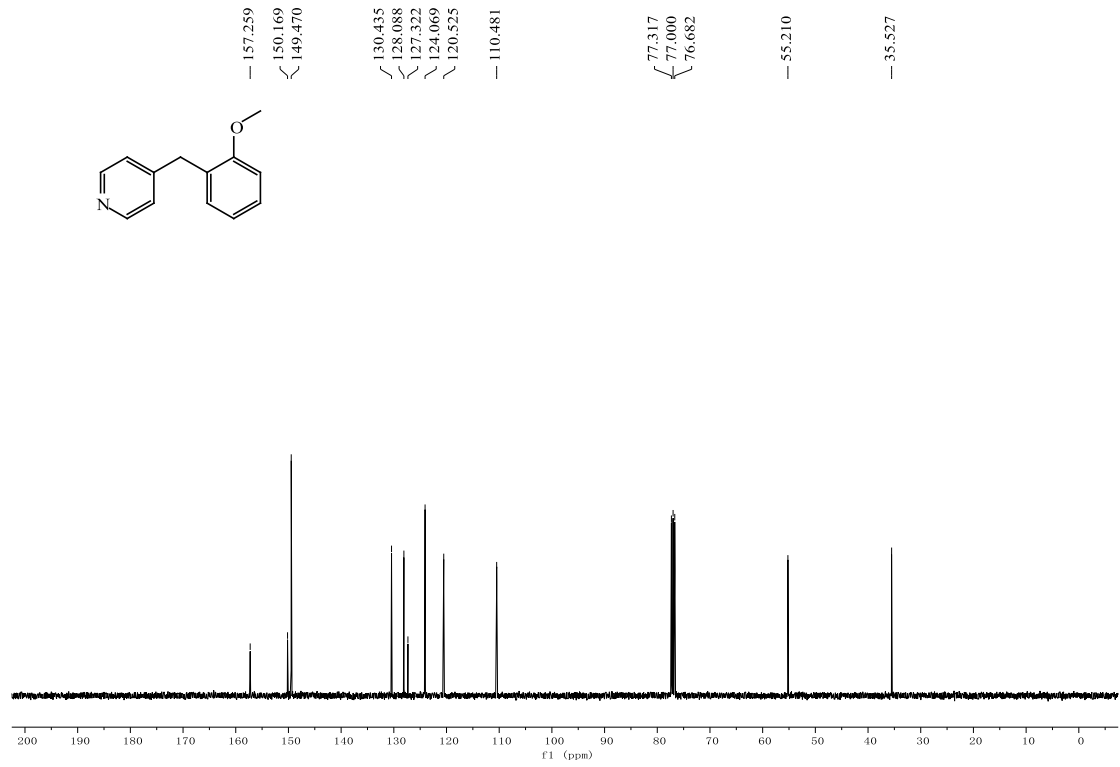

### 4-(2-Methylbenzyl)pyridine (3l)

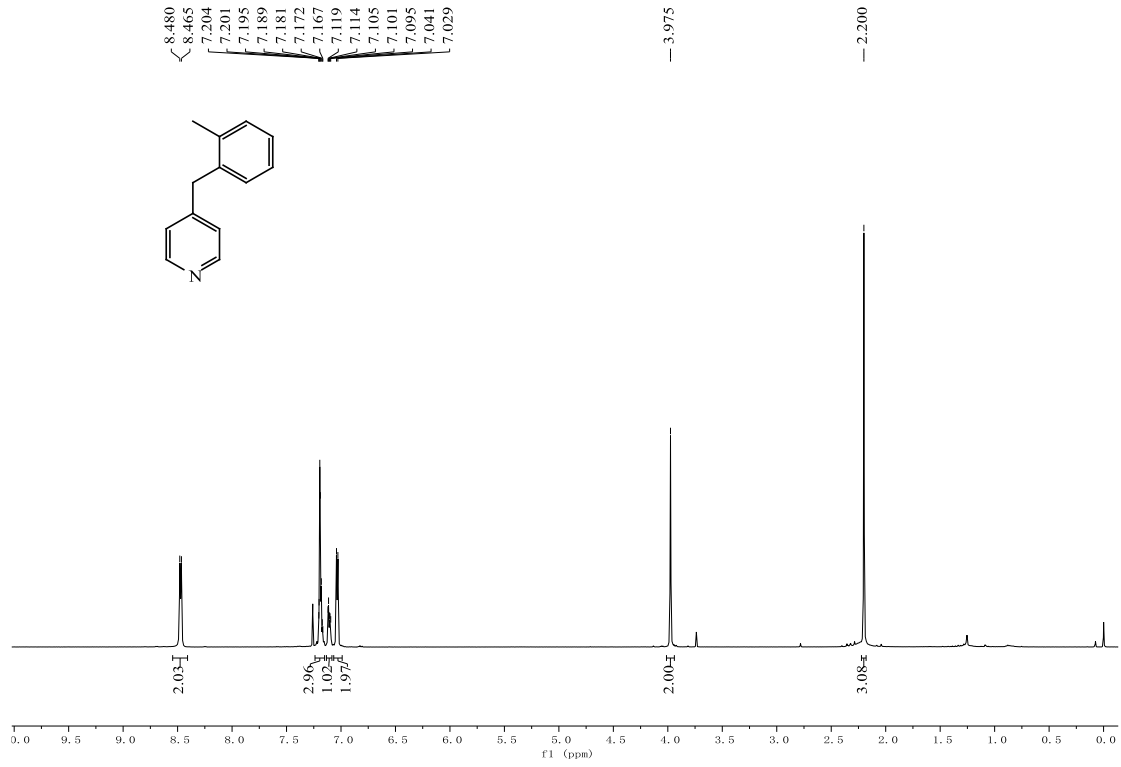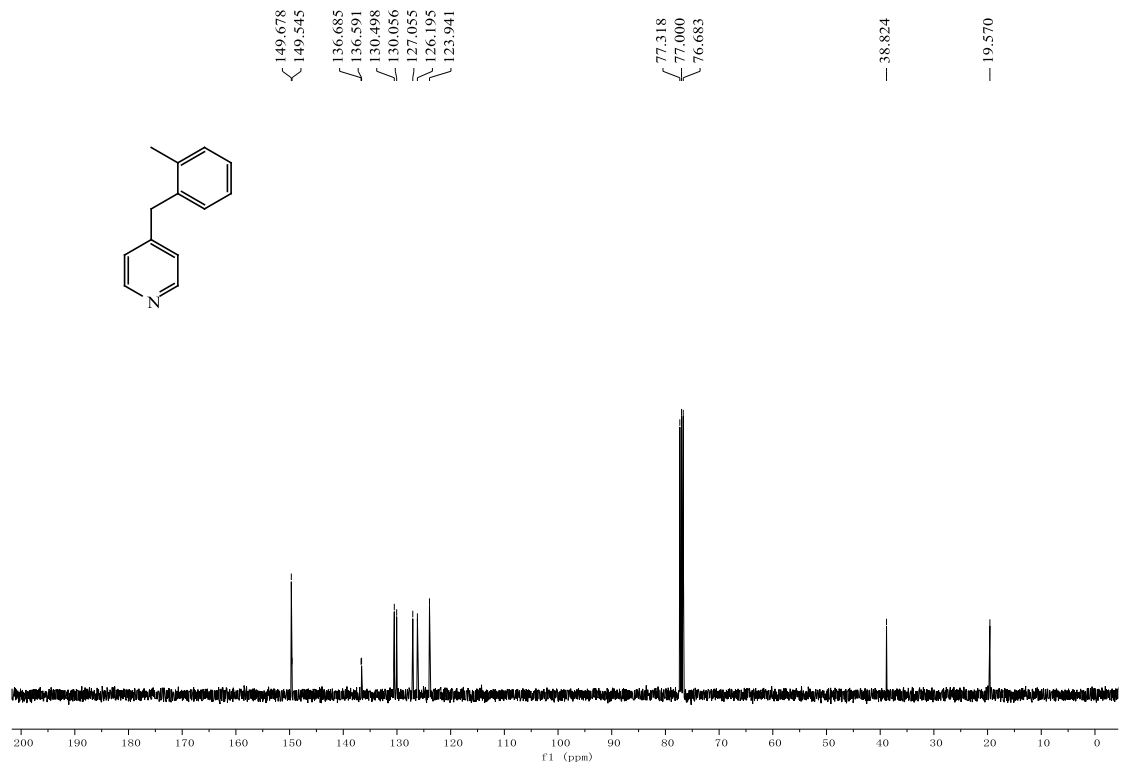

### 4-(2-Fluorobenzyl)pyridine (3m)

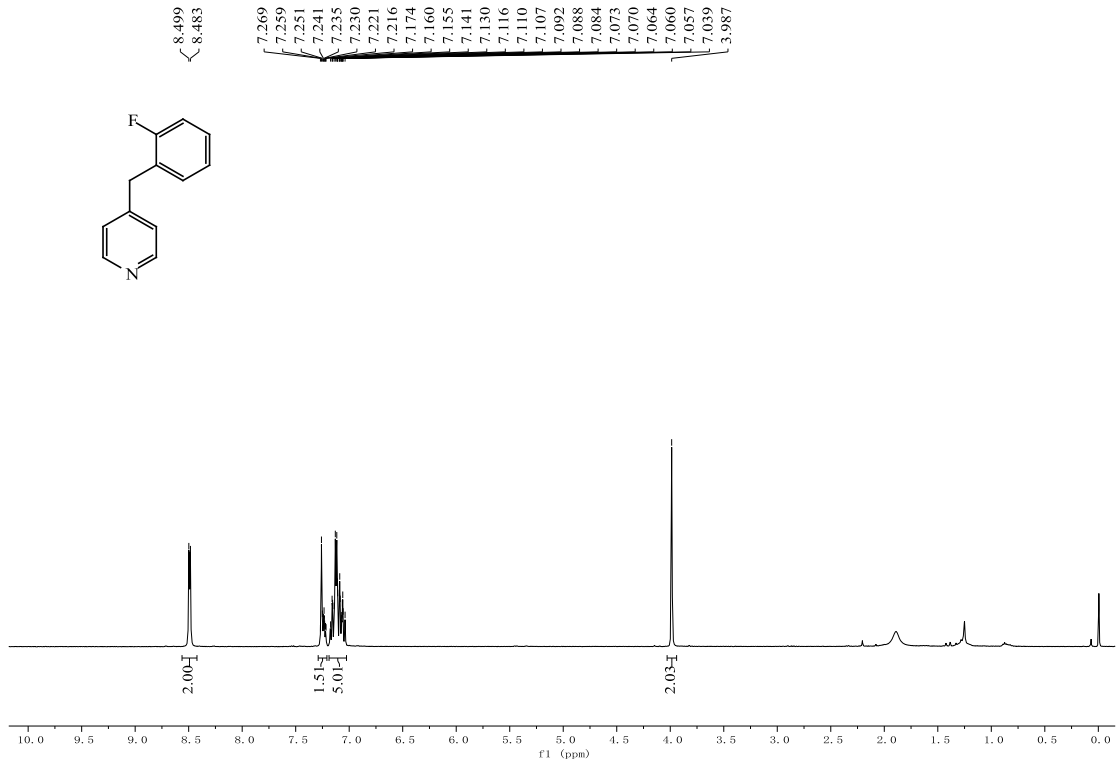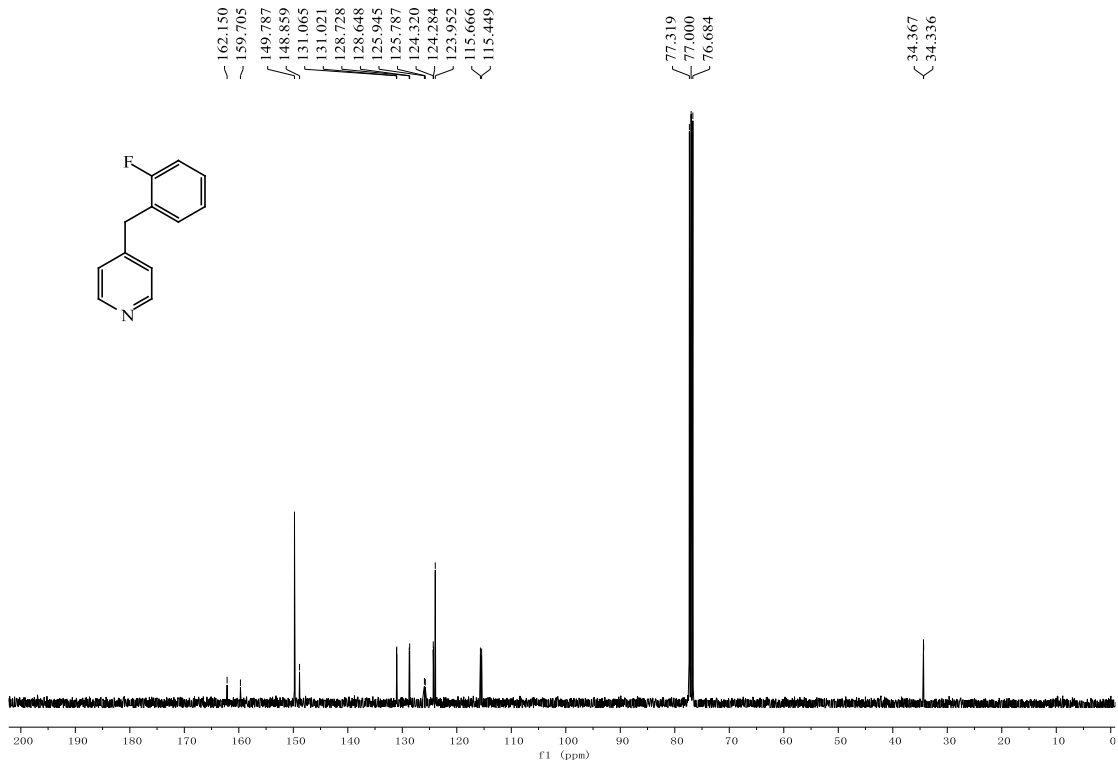

### 4-(2-Chlorobenzyl)pyridine (3n)

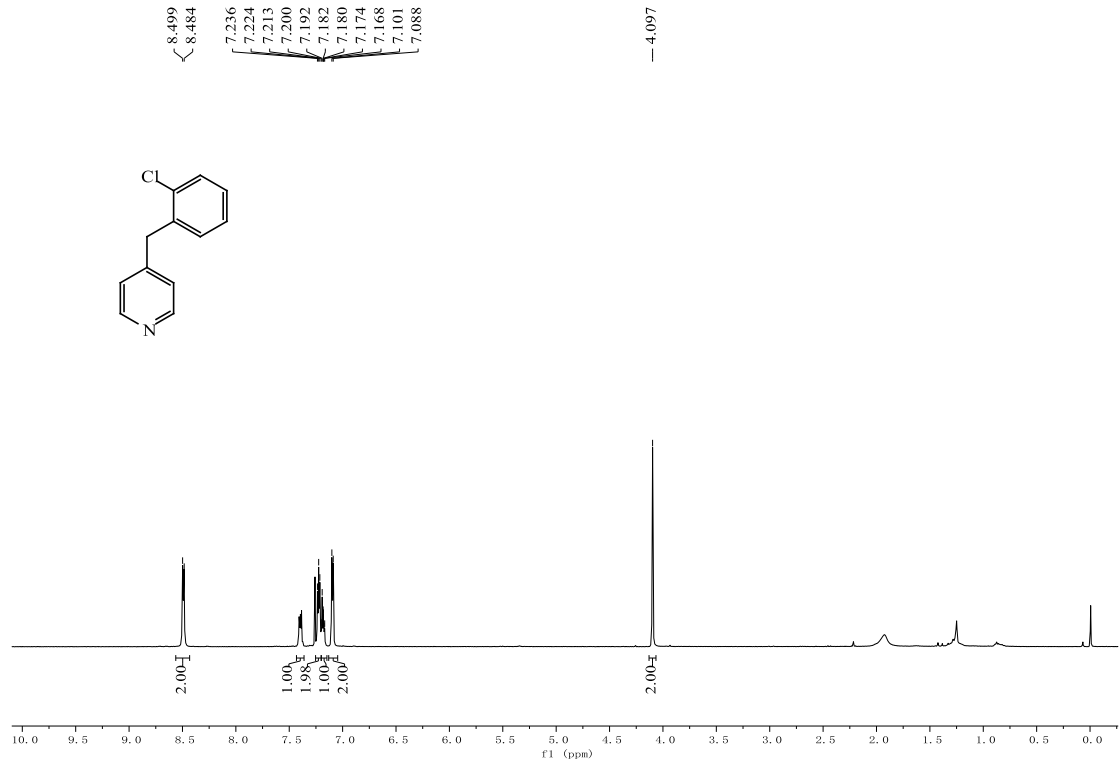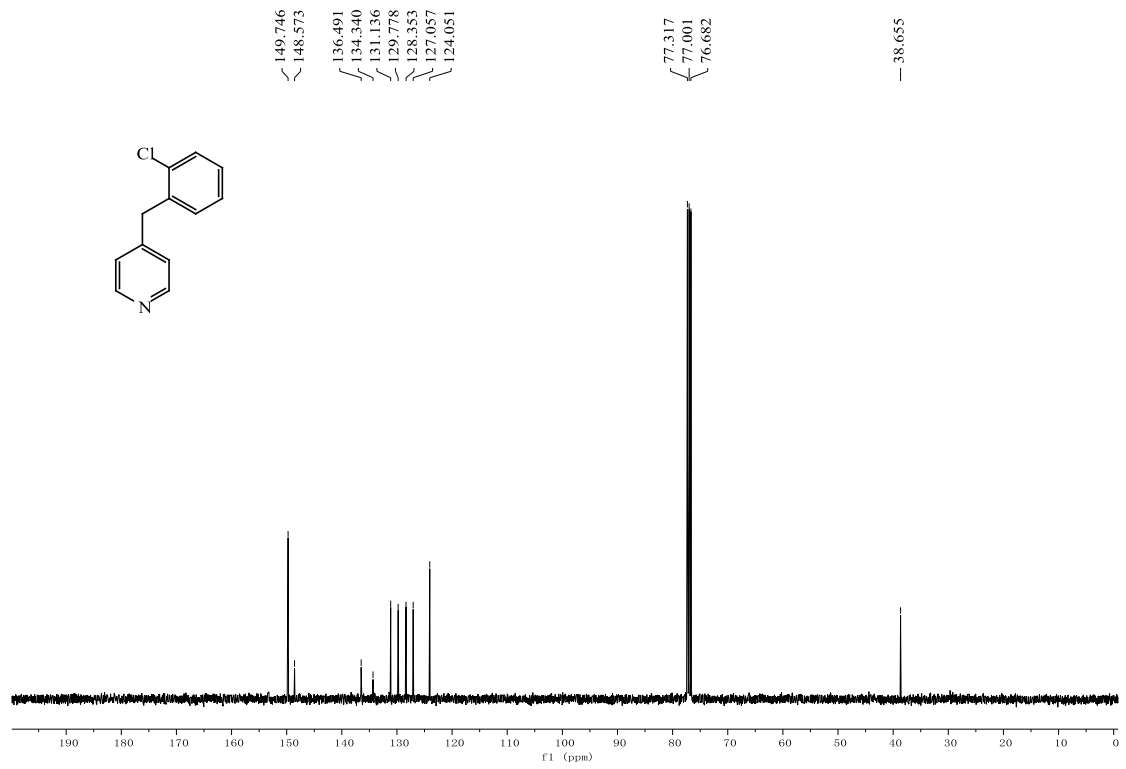

### 4-(3,5-Dimethylbenzyl)pyridine (3o)

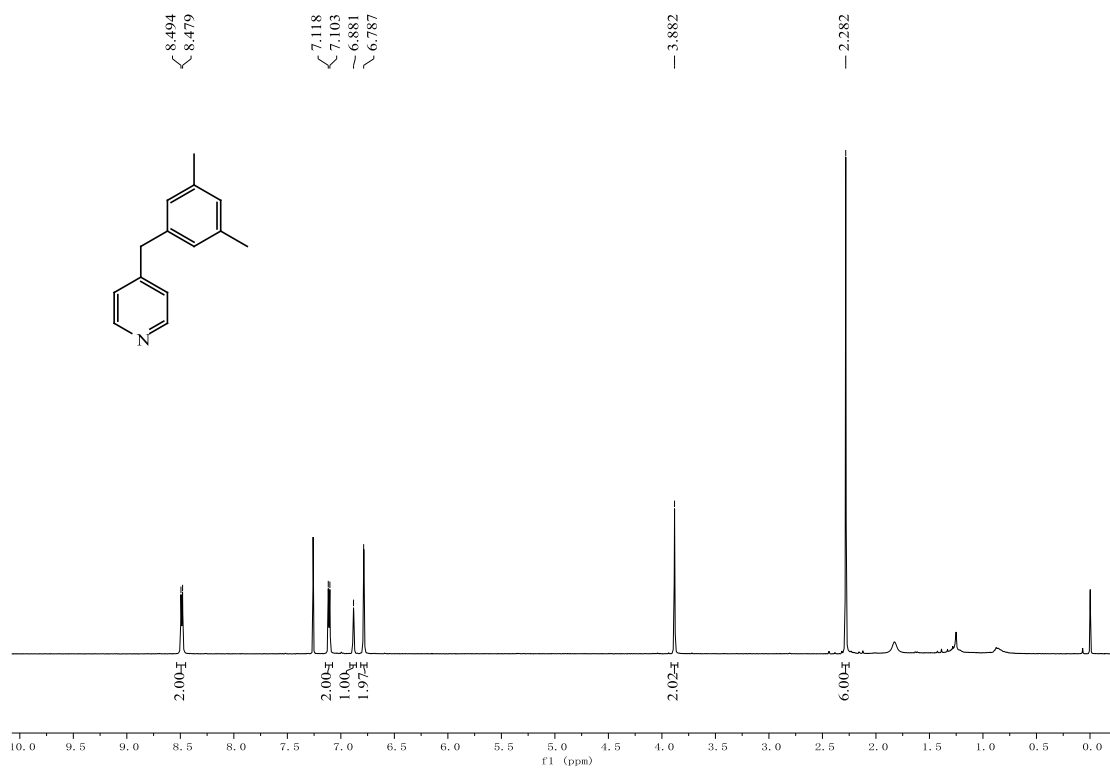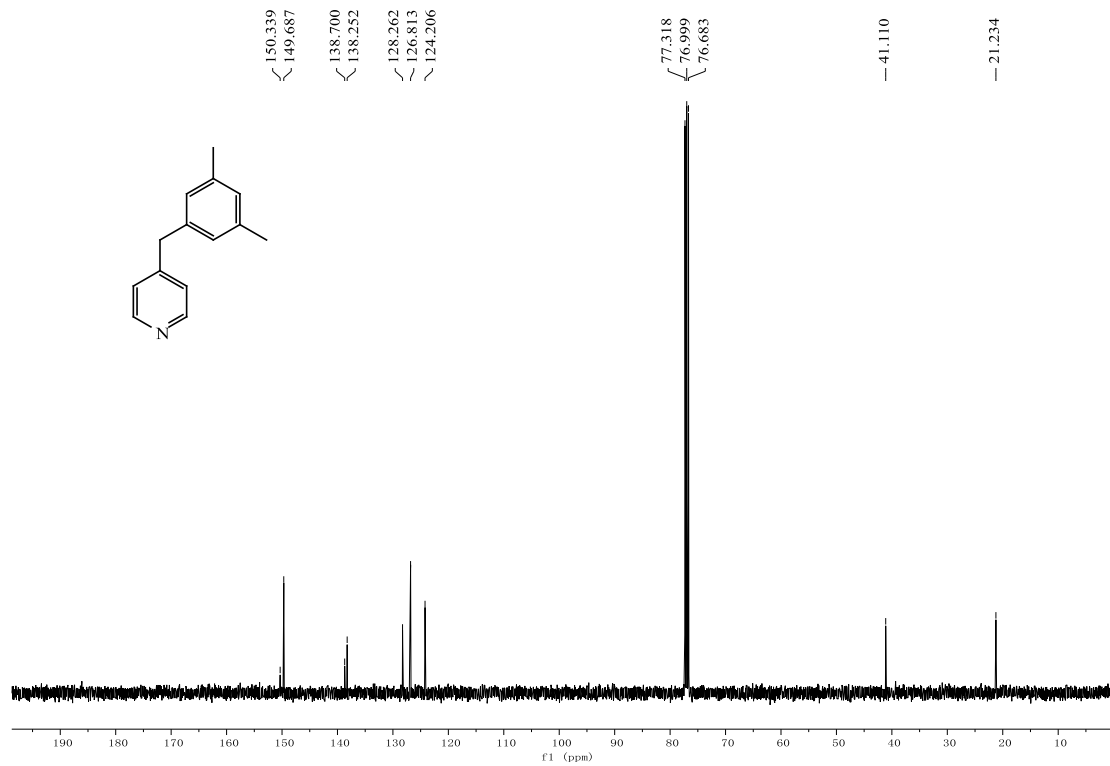

### 4-(Thiophen-2-ylmethyl)pyridine (3p)

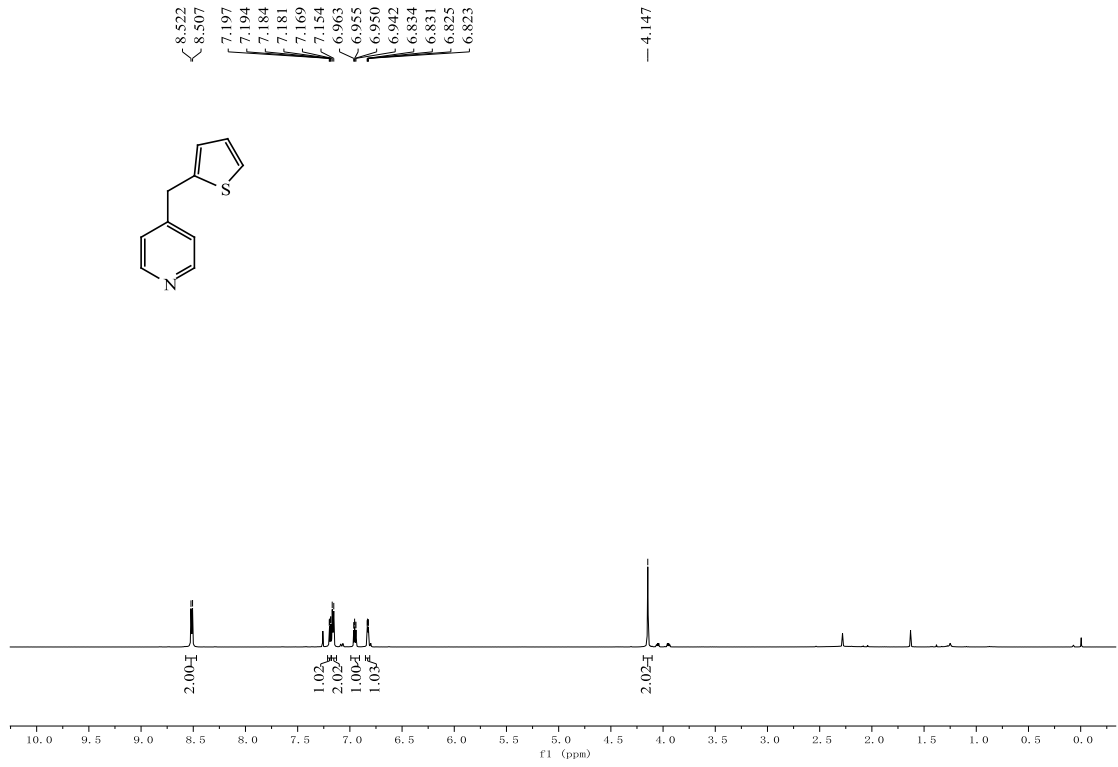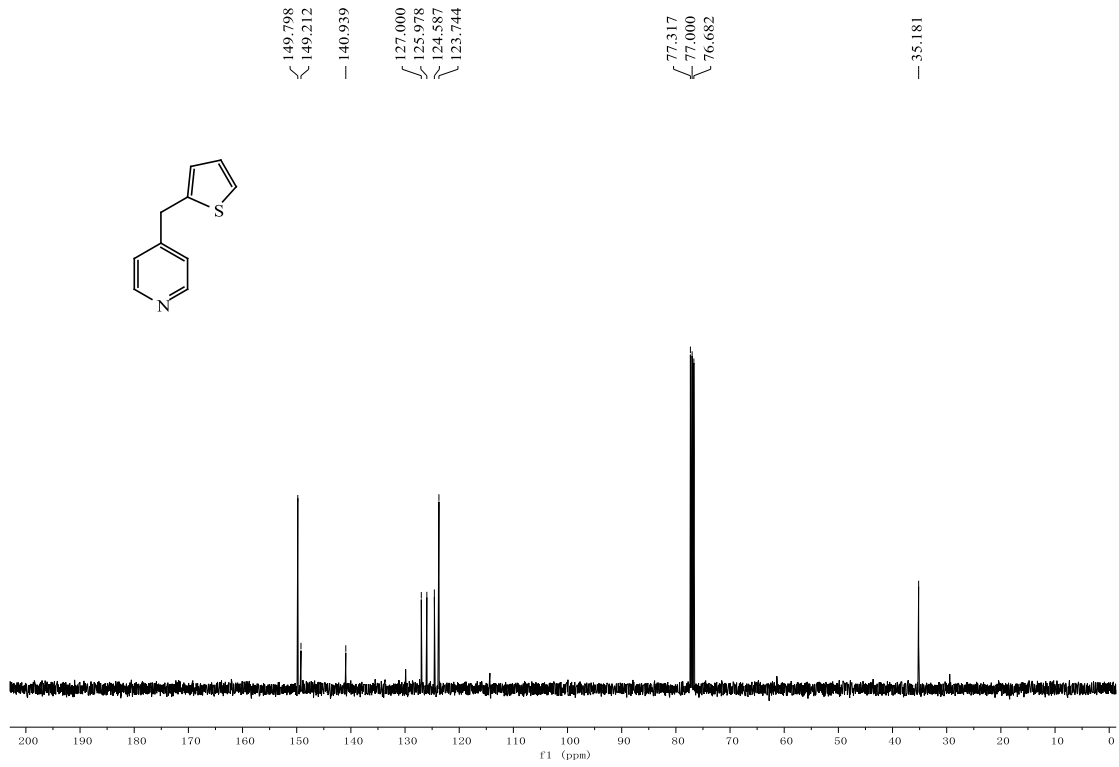



### 4-(4-(2-Chloroethoxy)benzyl)pyridine (3q)

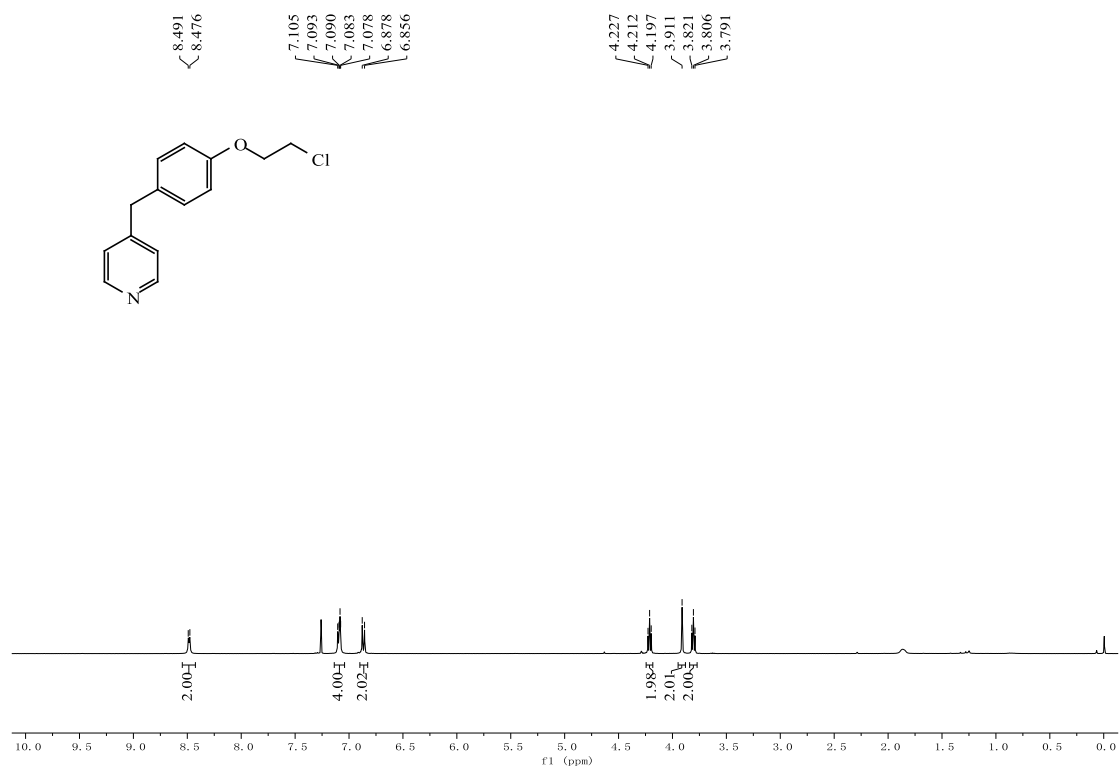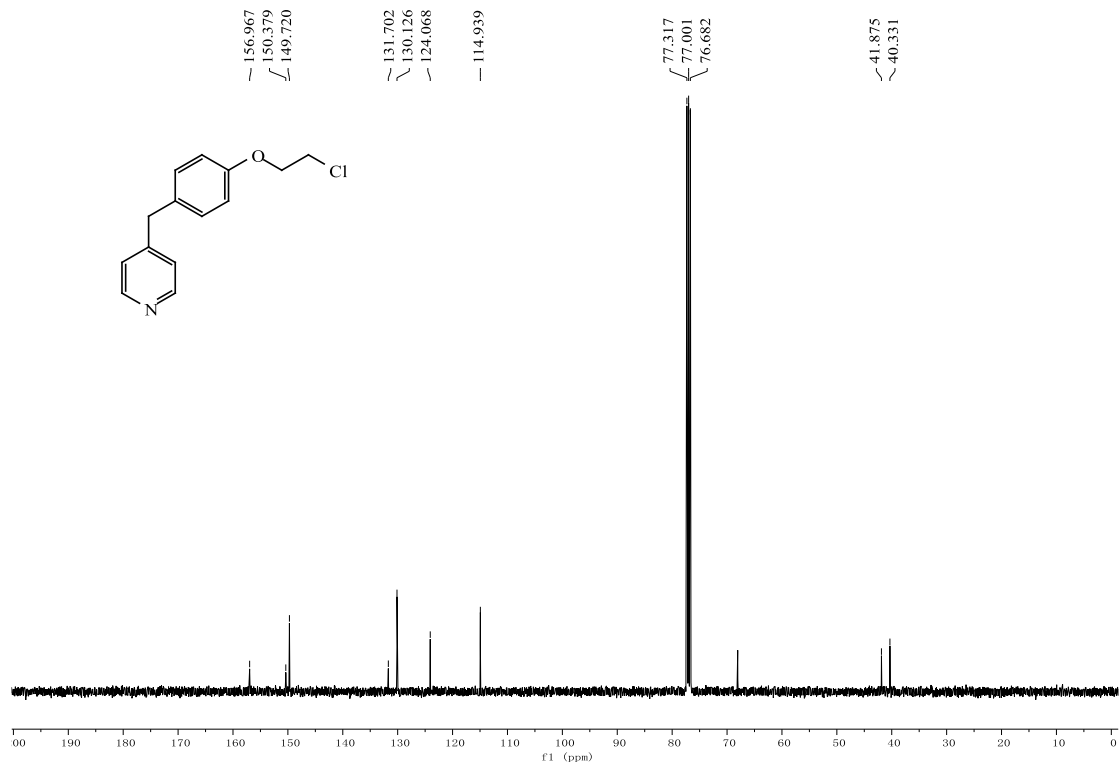

2-(4-(Pyridin-4-ylmethyl)phenoxy)ethan-1-ol (3r)

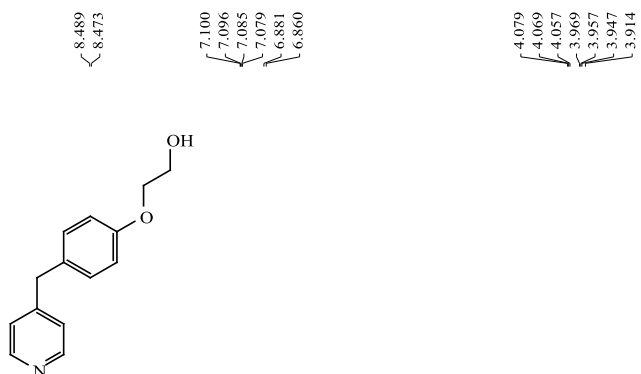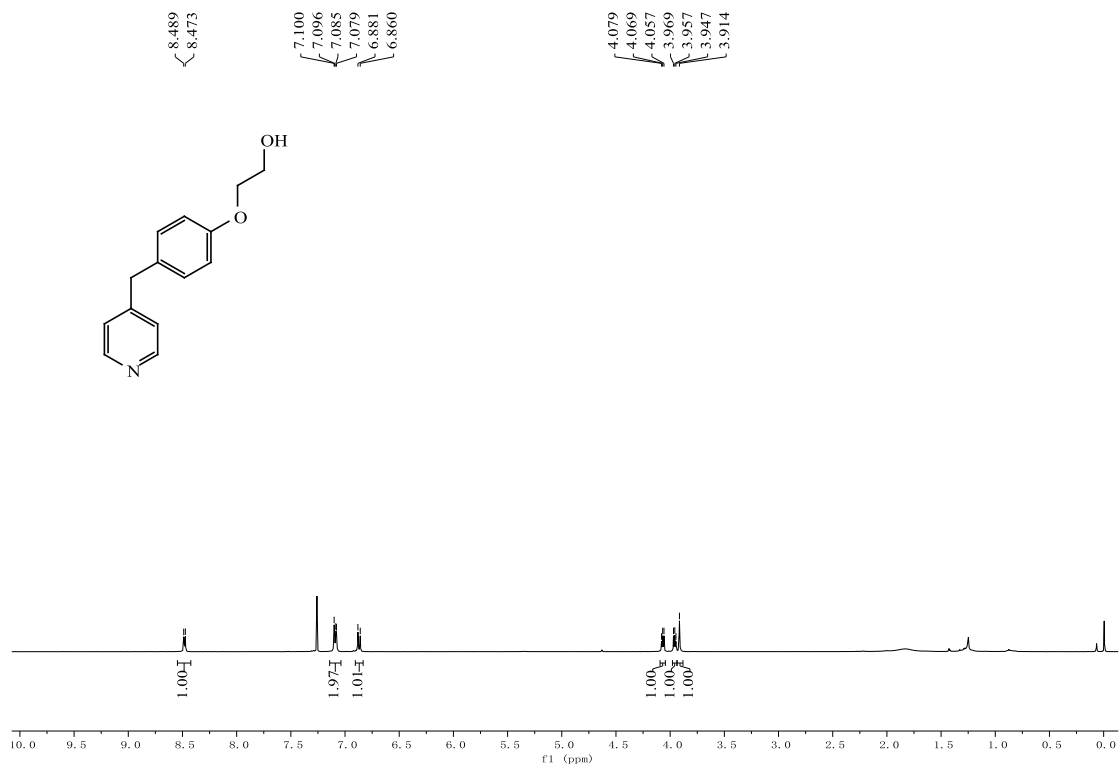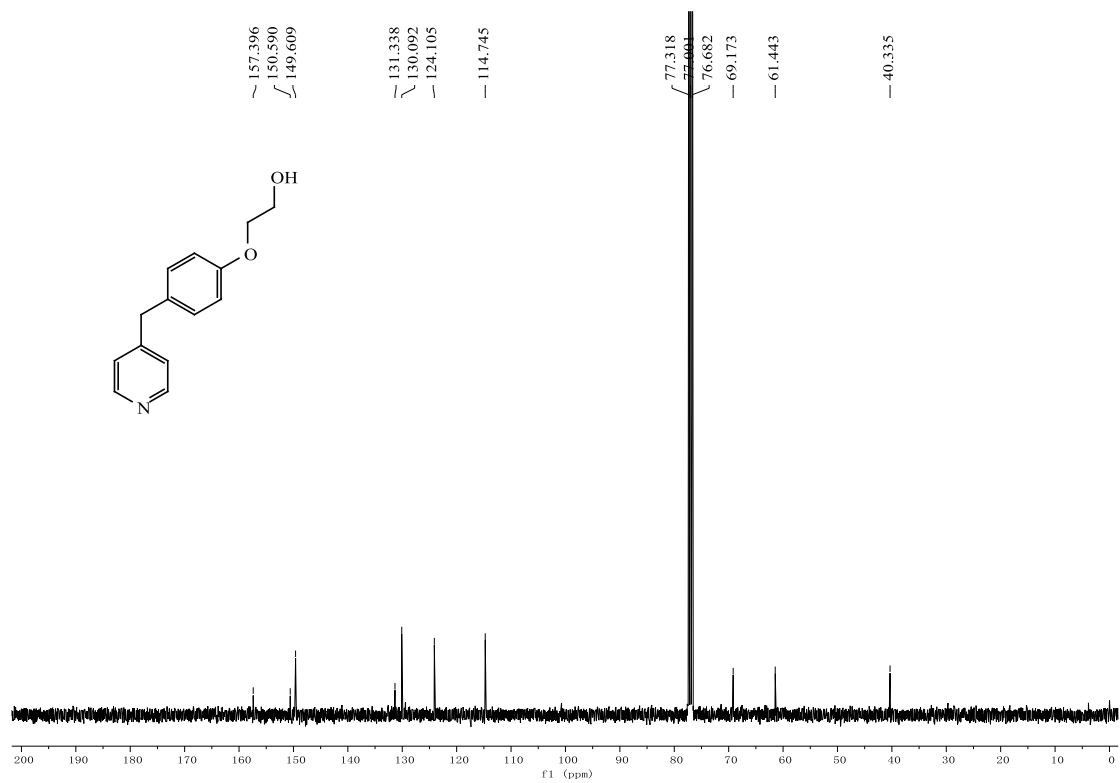

2-(4-(Pyridin-4-ylmethyl)phenoxy)ethyl acetate (3s)

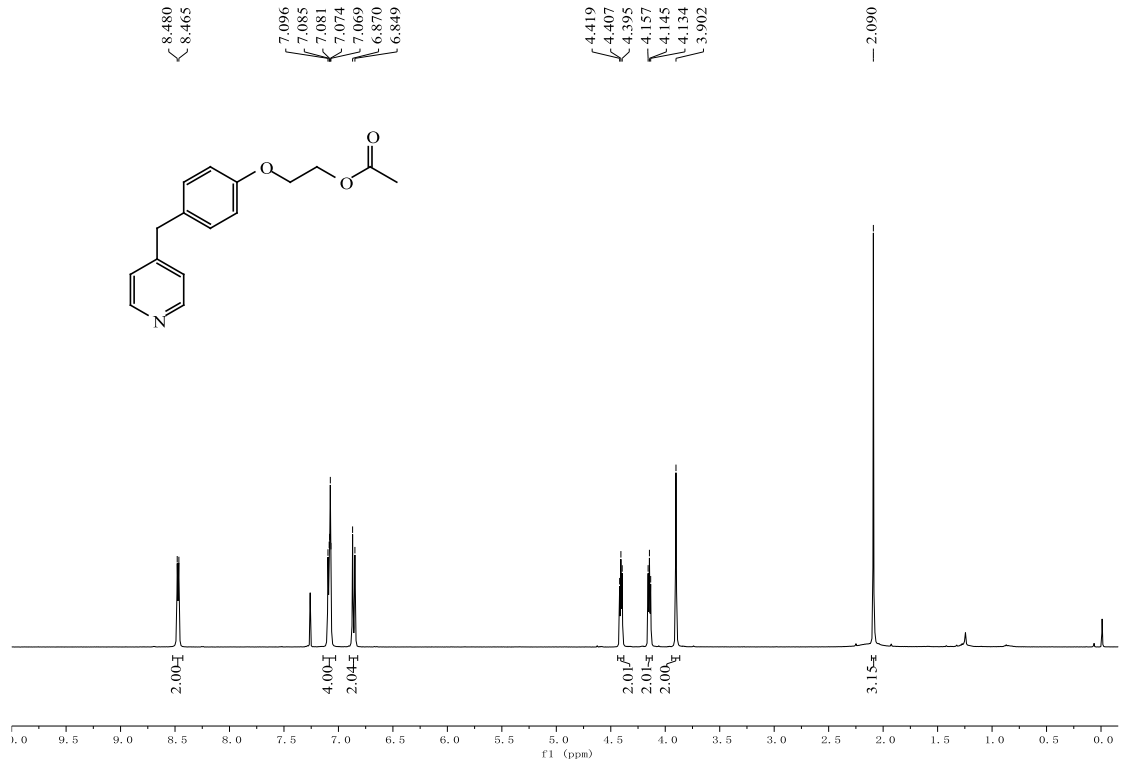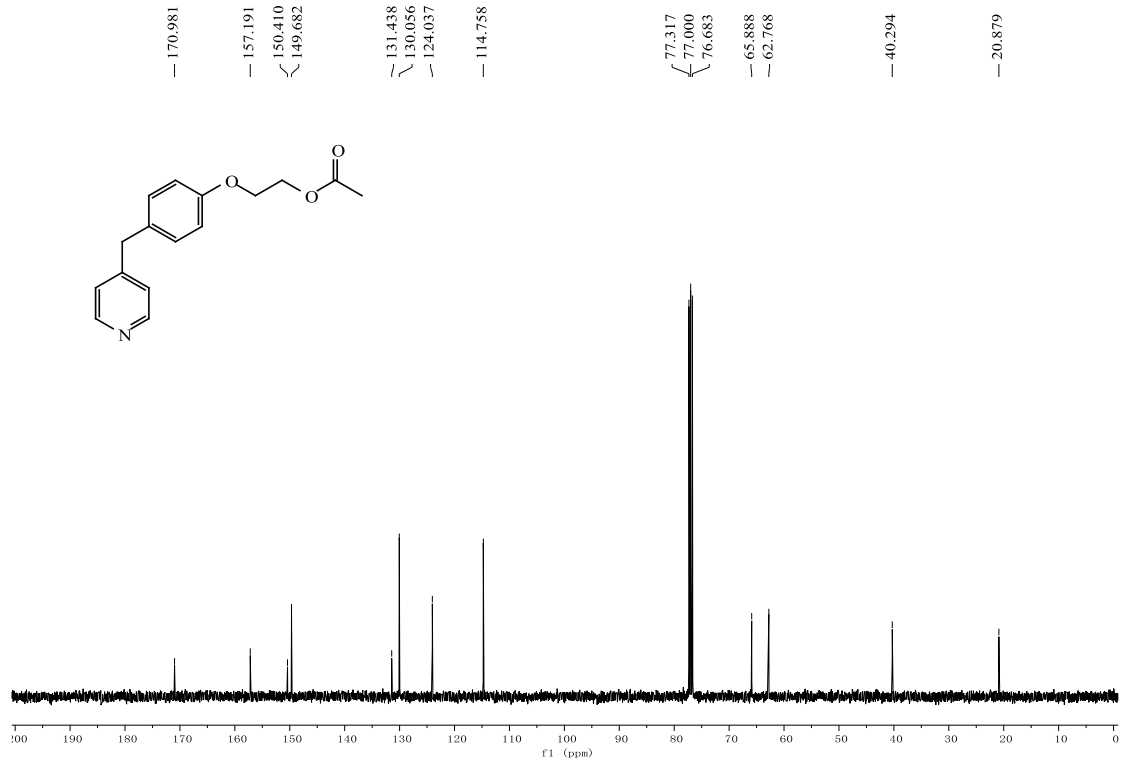

**2-(4-(Pyridin-4-ylmethyl)phenoxy)ethyl benzoate (3t)**

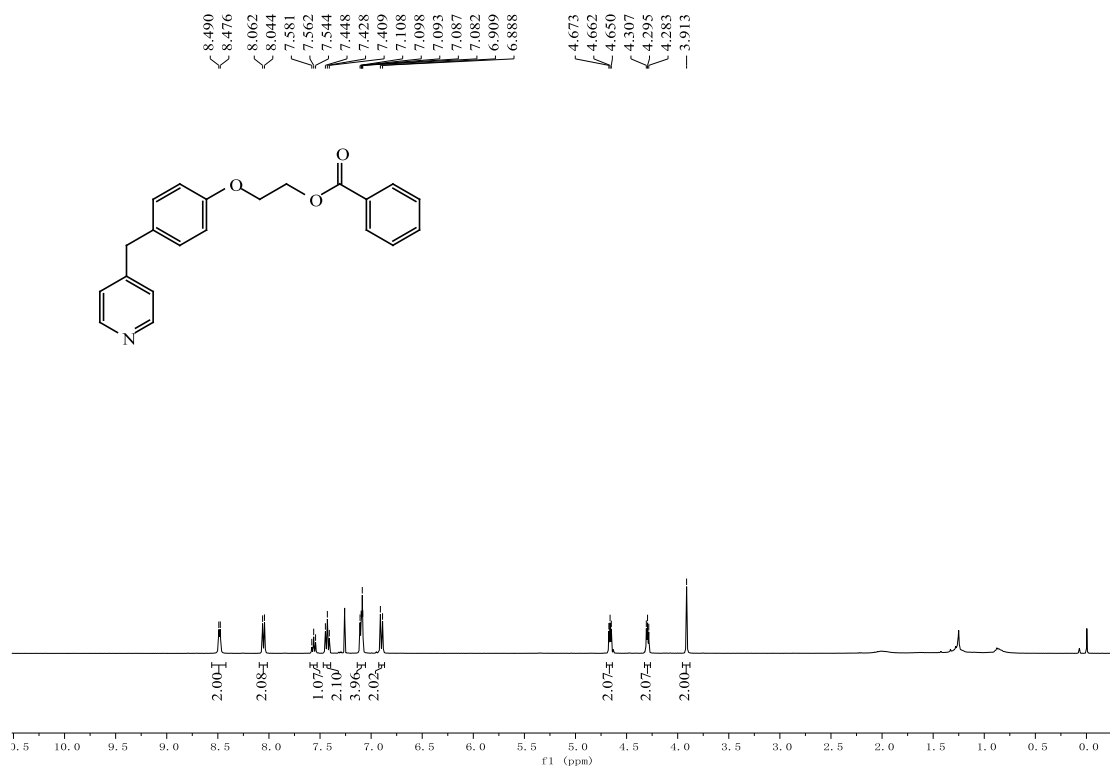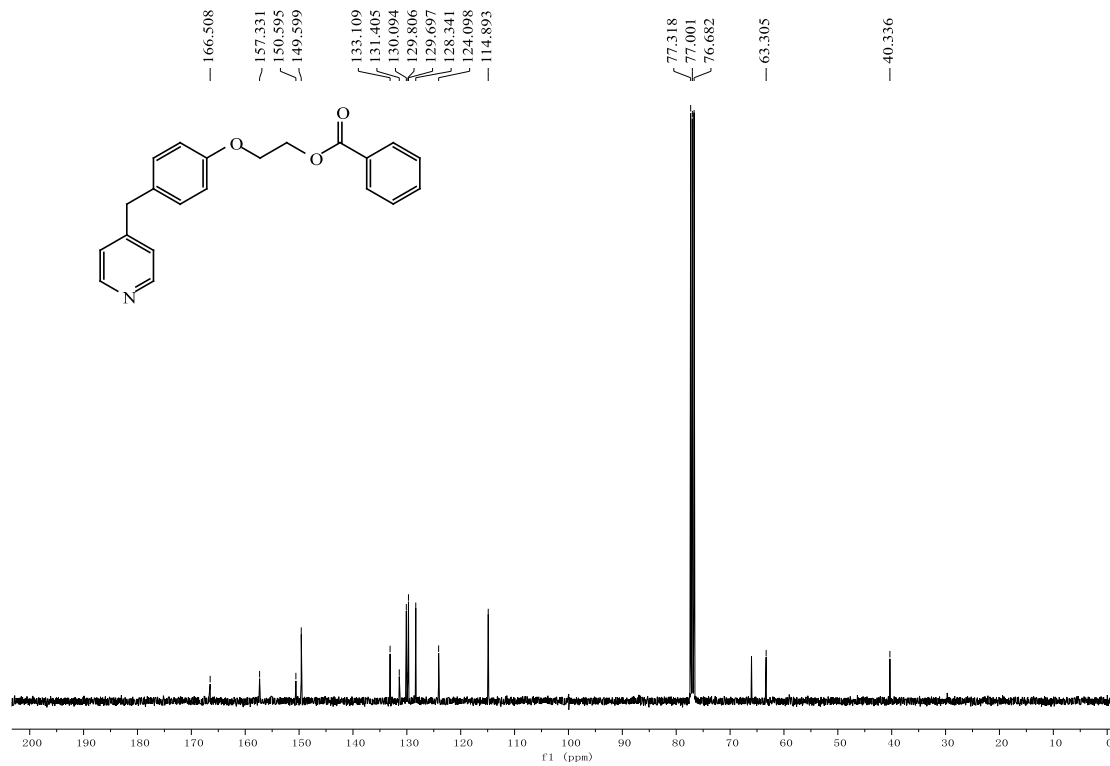

**4-(2,3-Dihydro-1H-inden-1-yl)pyridine (4a)**

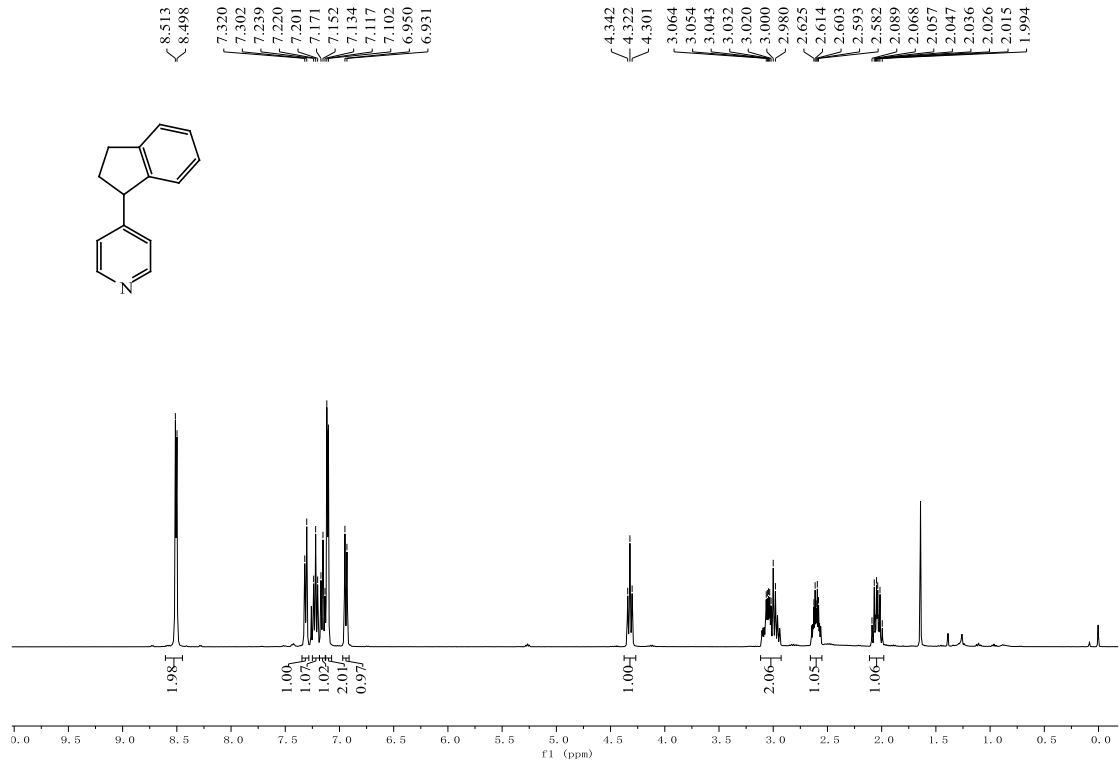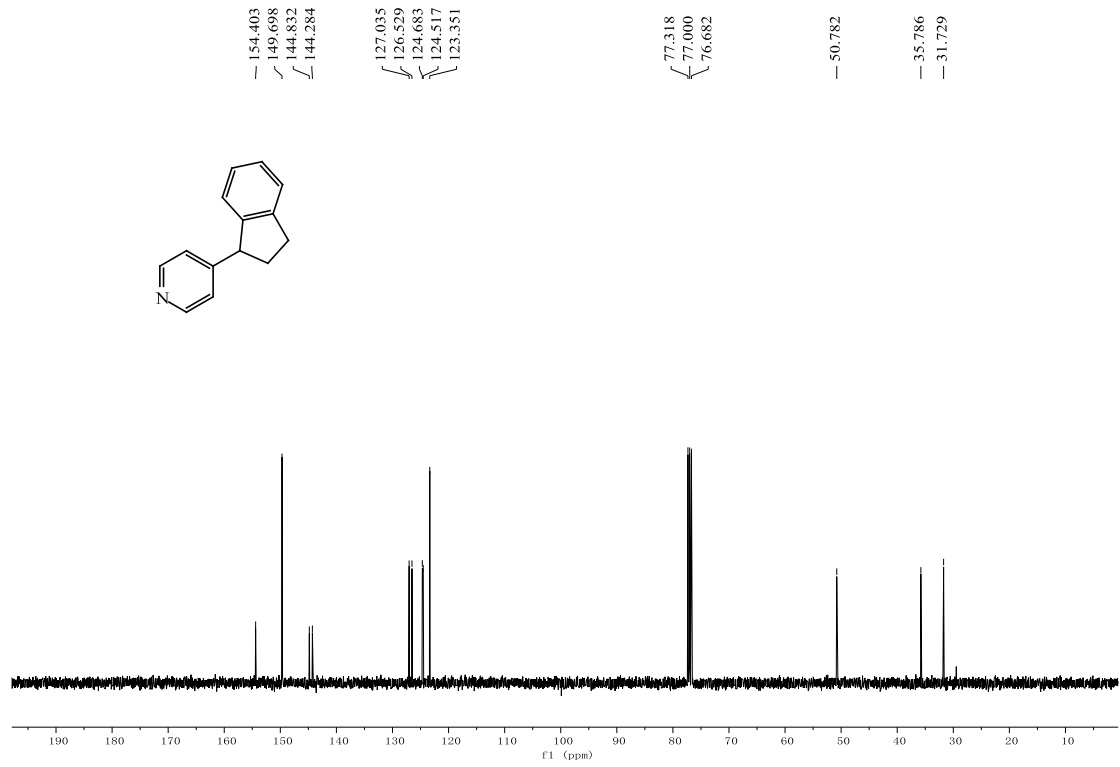

**4-(1,2,3,4-Tetrahydronaphthalen-1-yl)pyridine (4b)**

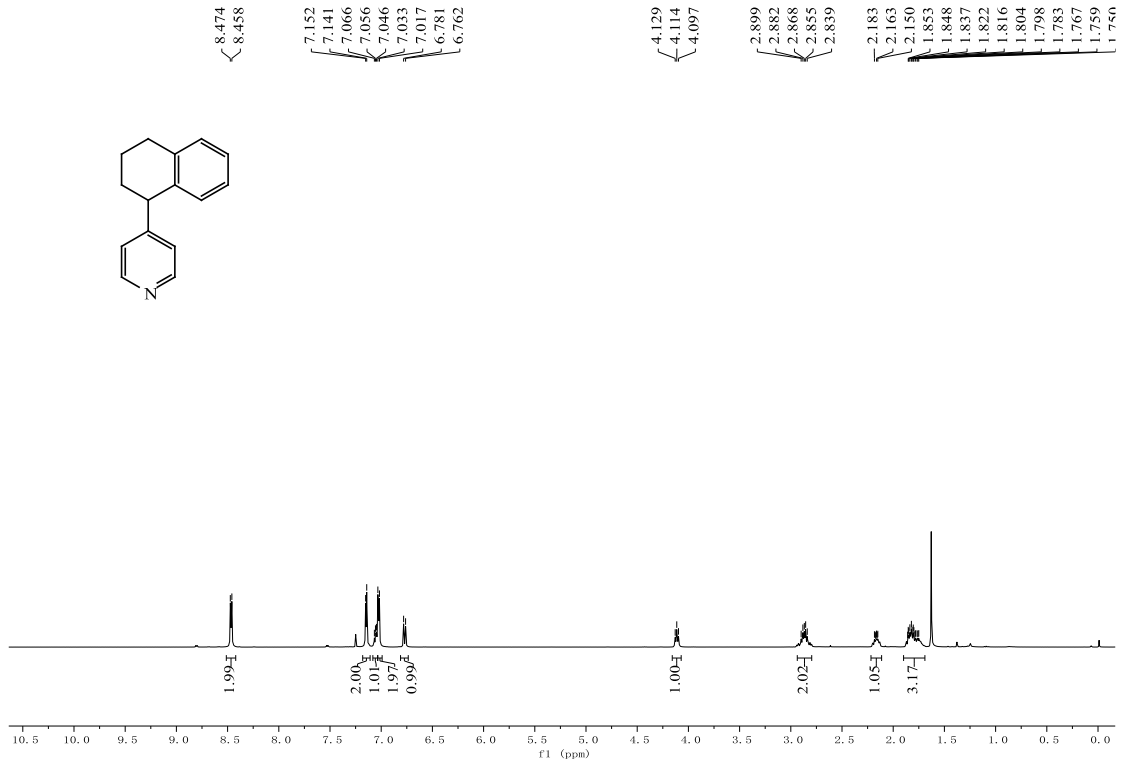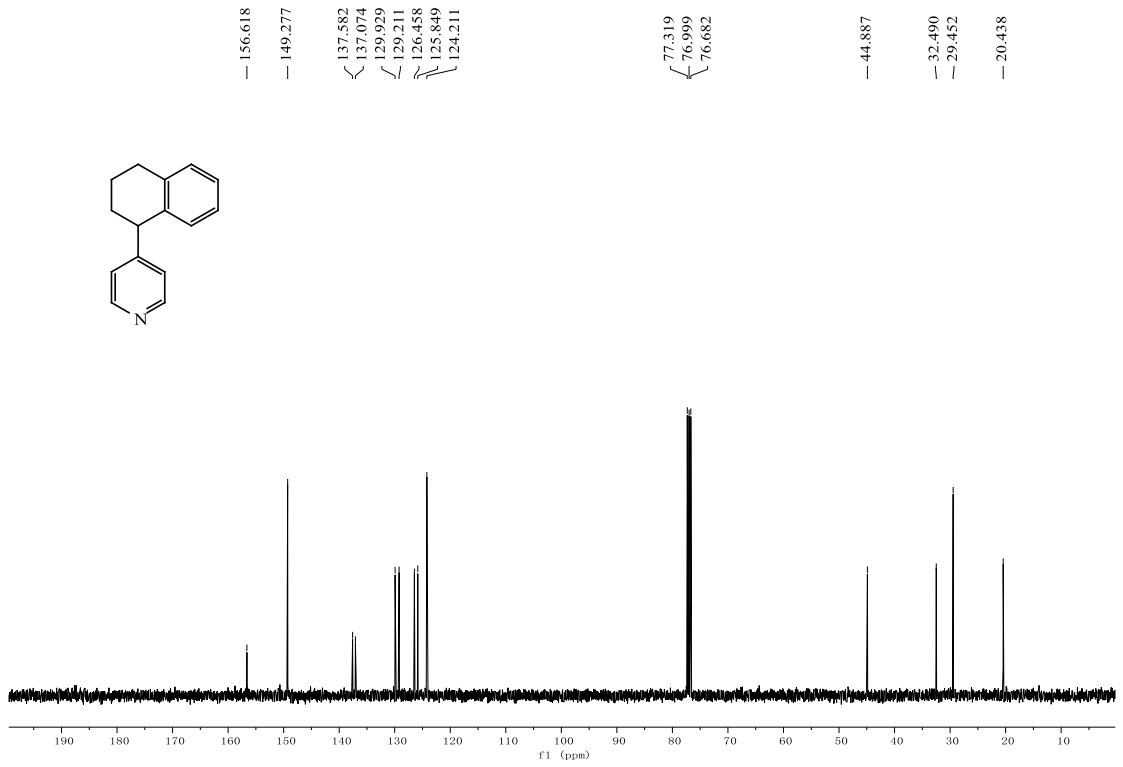

**4-(1,2-Diphenylethyl)pyridine (4c)**

8.451  
8.437  
7.298  
7.280  
7.262  
7.223  
7.219  
7.203  
7.199  
7.186  
7.182  
7.179  
7.173  
7.164  
7.160  
7.154  
7.150  
7.146  
7.133  
7.101  
7.085  
6.999  
6.983  
4.225  
4.205  
4.185  
3.401  
3.382  
3.367  
3.348  
3.327  
3.314  
3.293

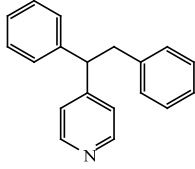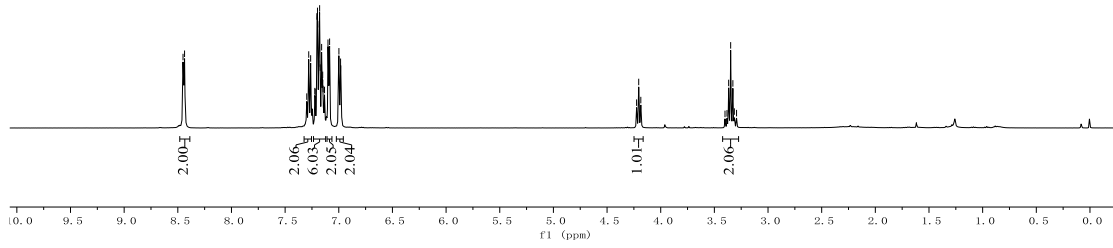

153.214  
149.545  
142.506  
139.135  
128.894  
128.549  
128.181  
127.919  
126.755  
126.179  
123.396  
77.318  
77.001  
76.683  
52.457  
41.259

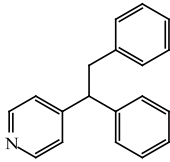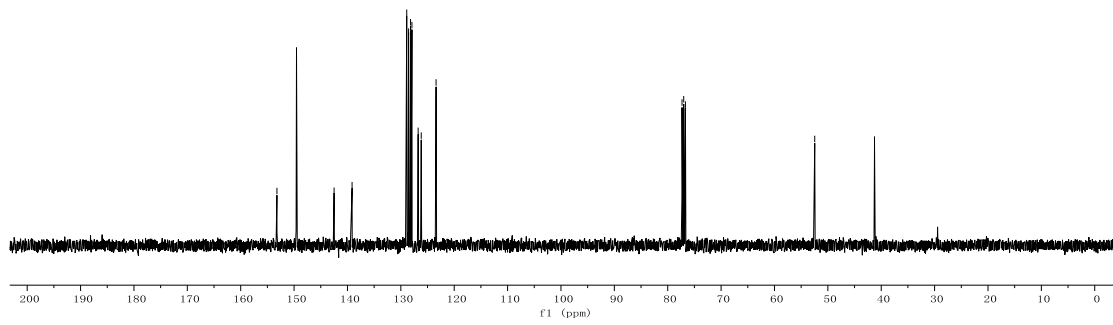

### 4-(1-Phenylethyl)pyridine (4d)

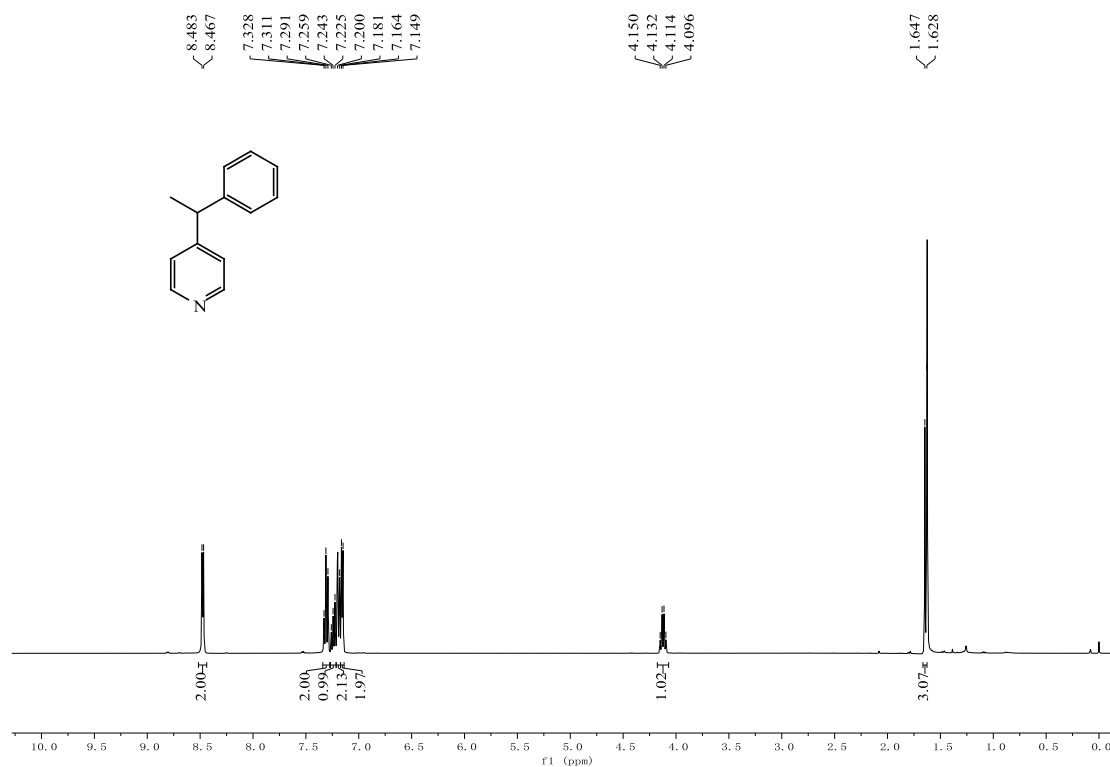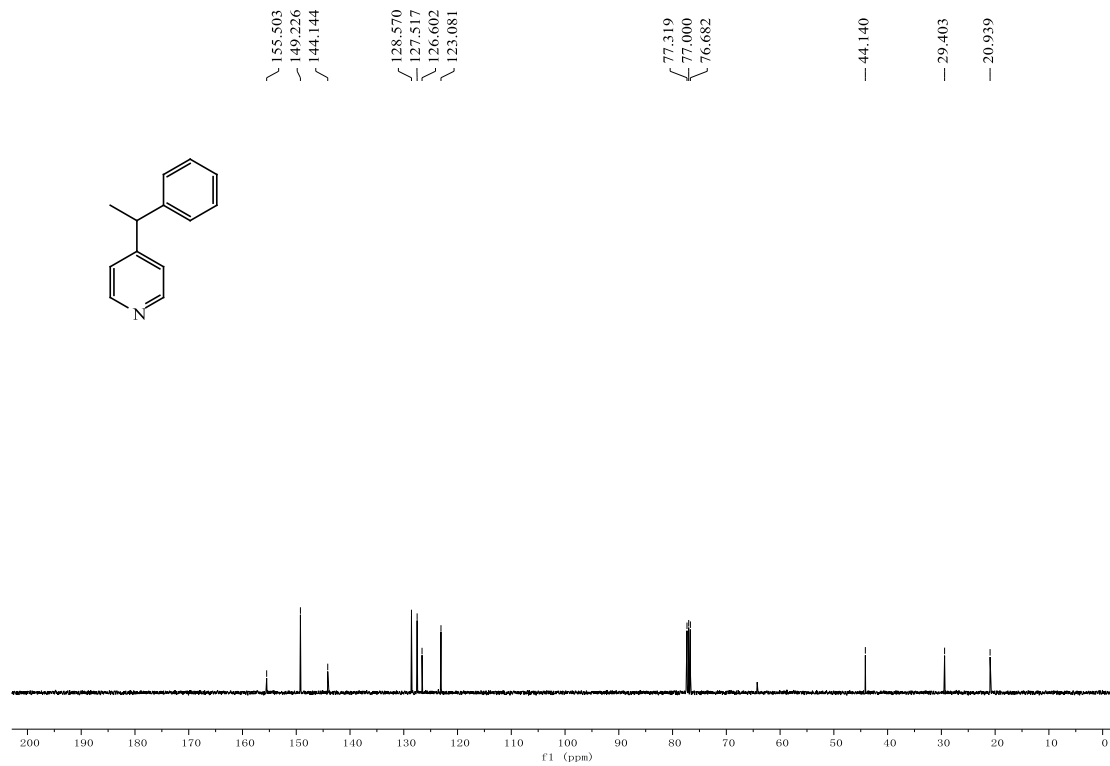



### 4-(1-(4-Methoxyphenyl)ethyl)pyridine (4e)

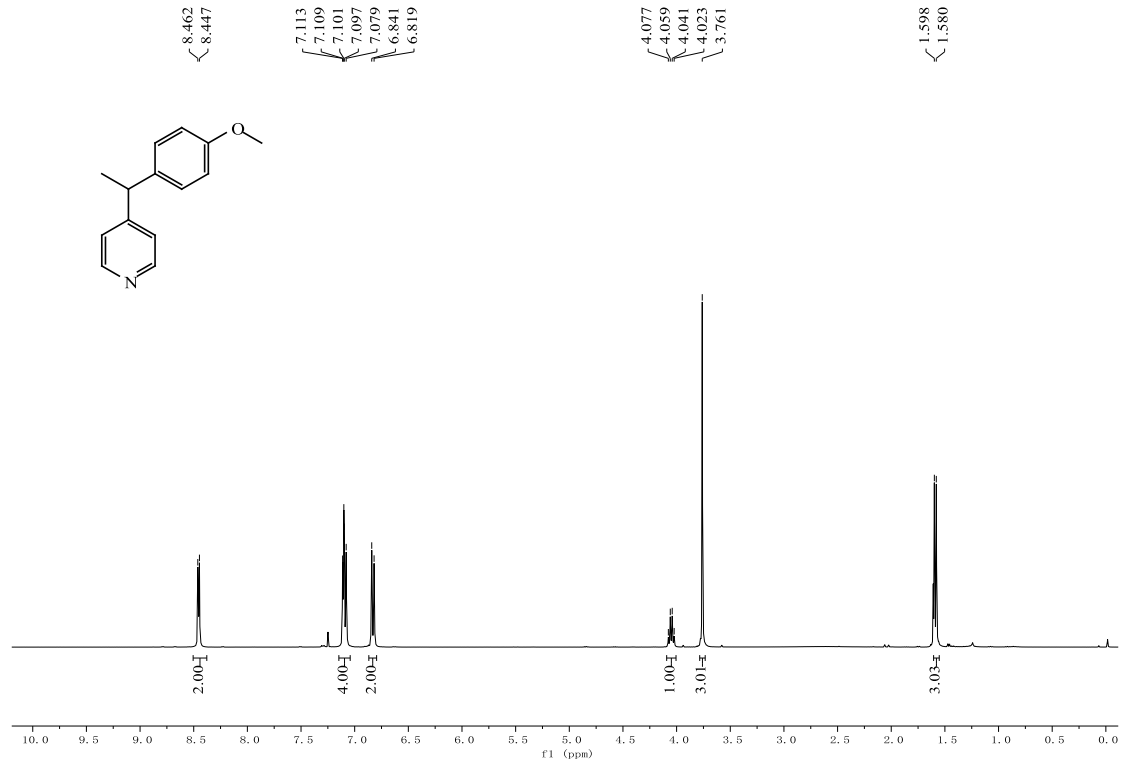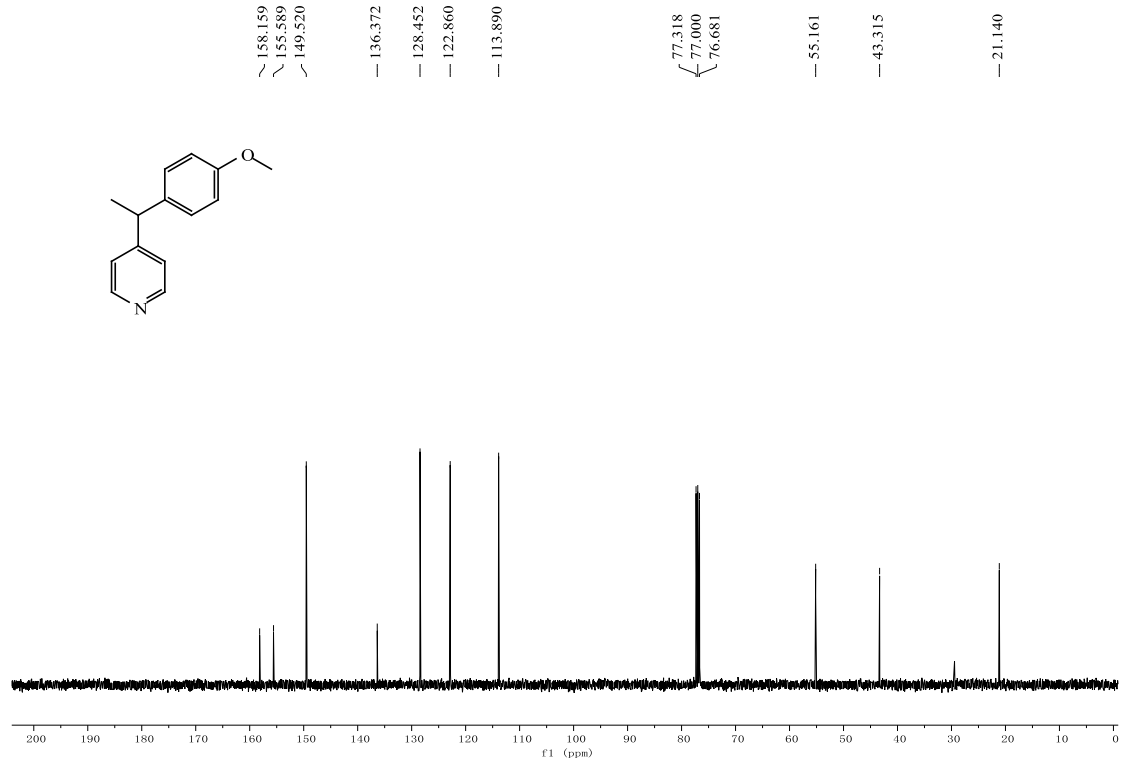

4-(1-(*p*-tolyl)ethyl)pyridine (4f) and 4-(4-ethylbenzyl)pyridine (4f')

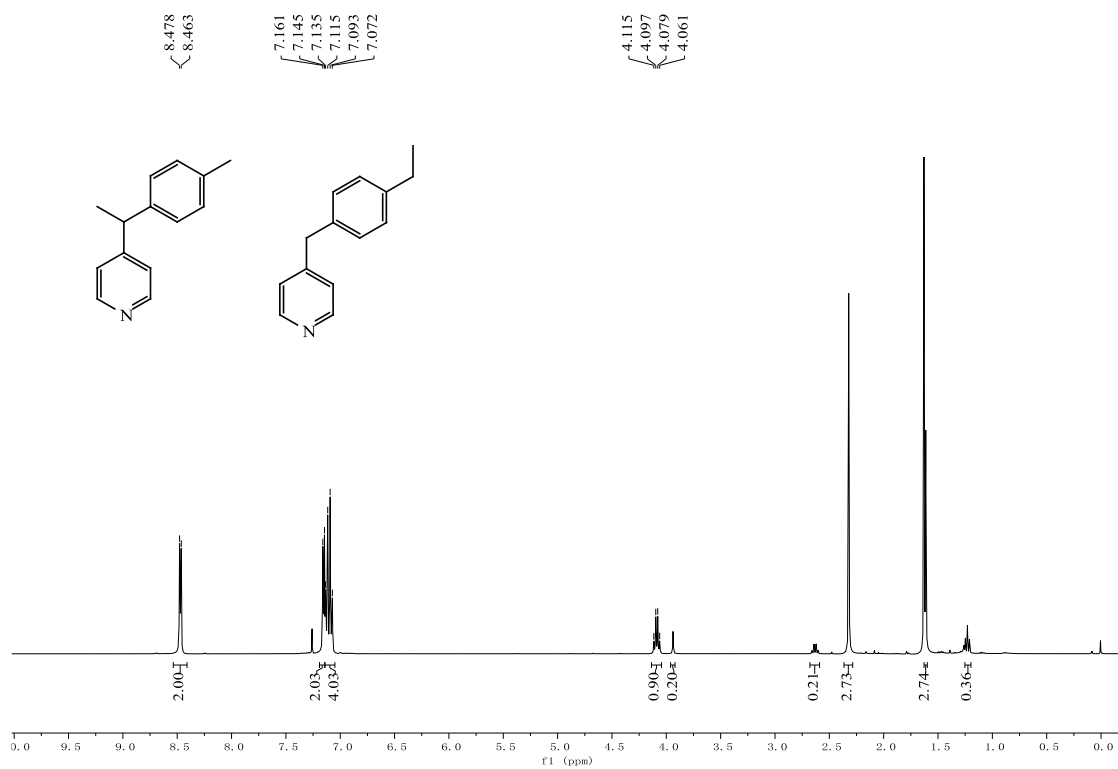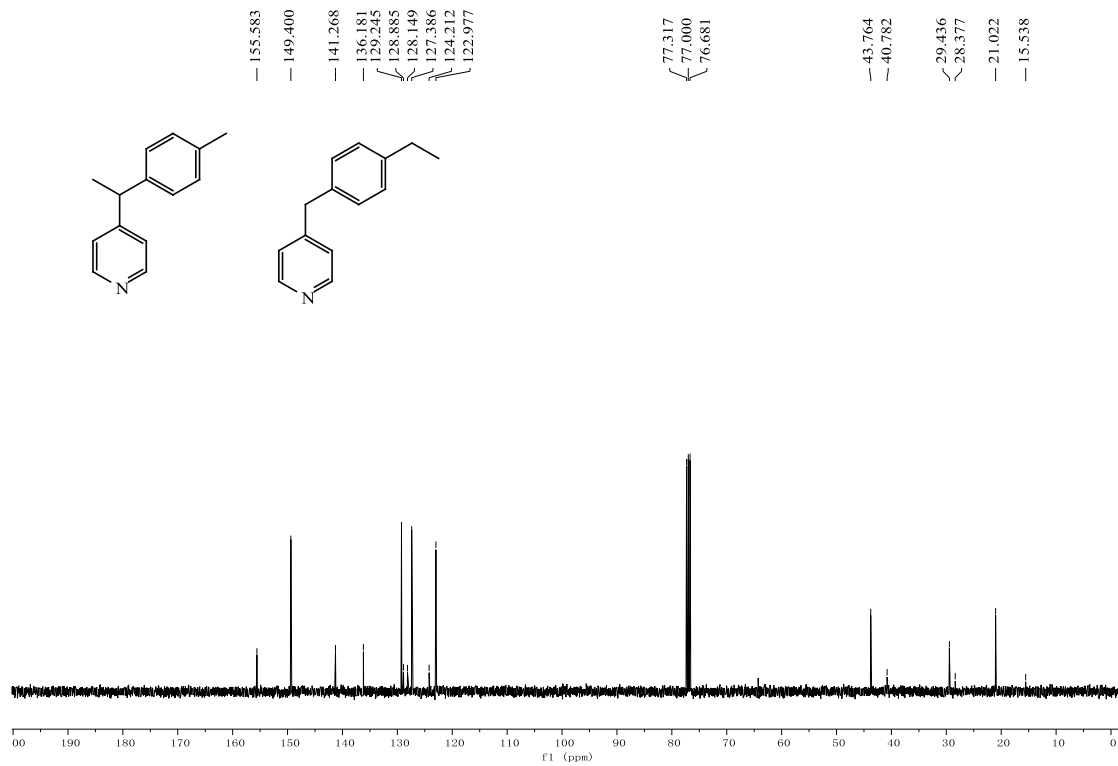

### 4-Benzhydrylpyridine (4g)

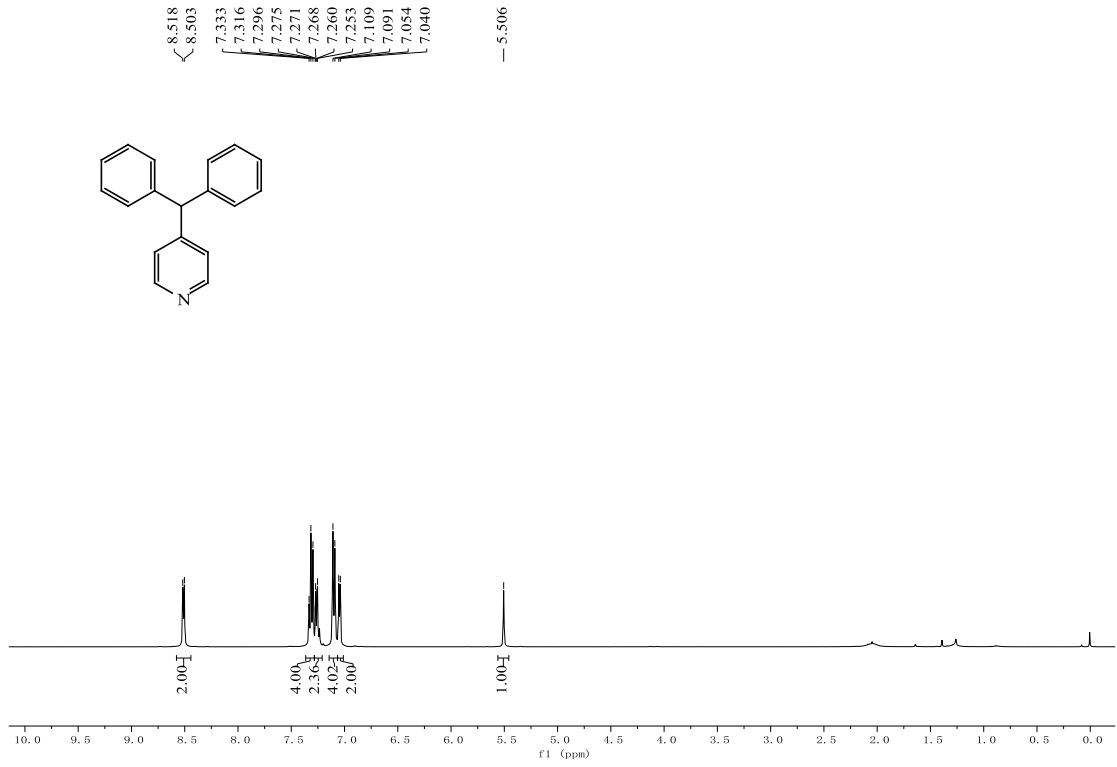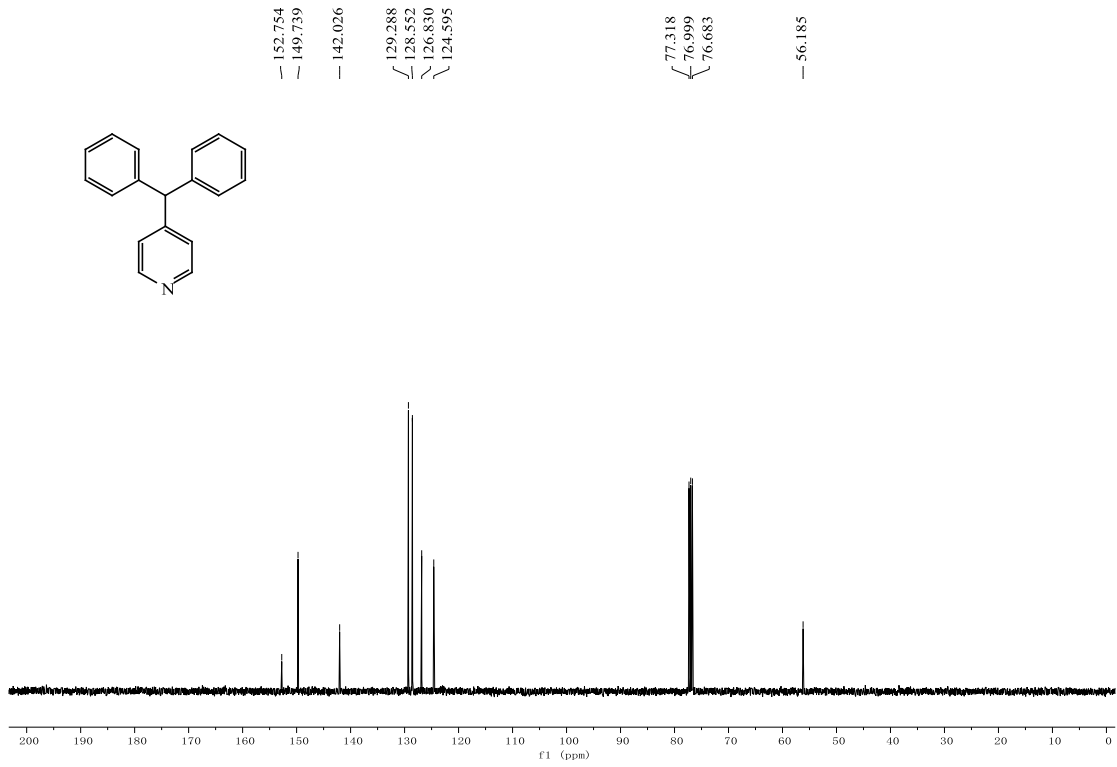

### 4-(bis(4-*tert*-Butyl)phenyl)methylpyridine (4h)

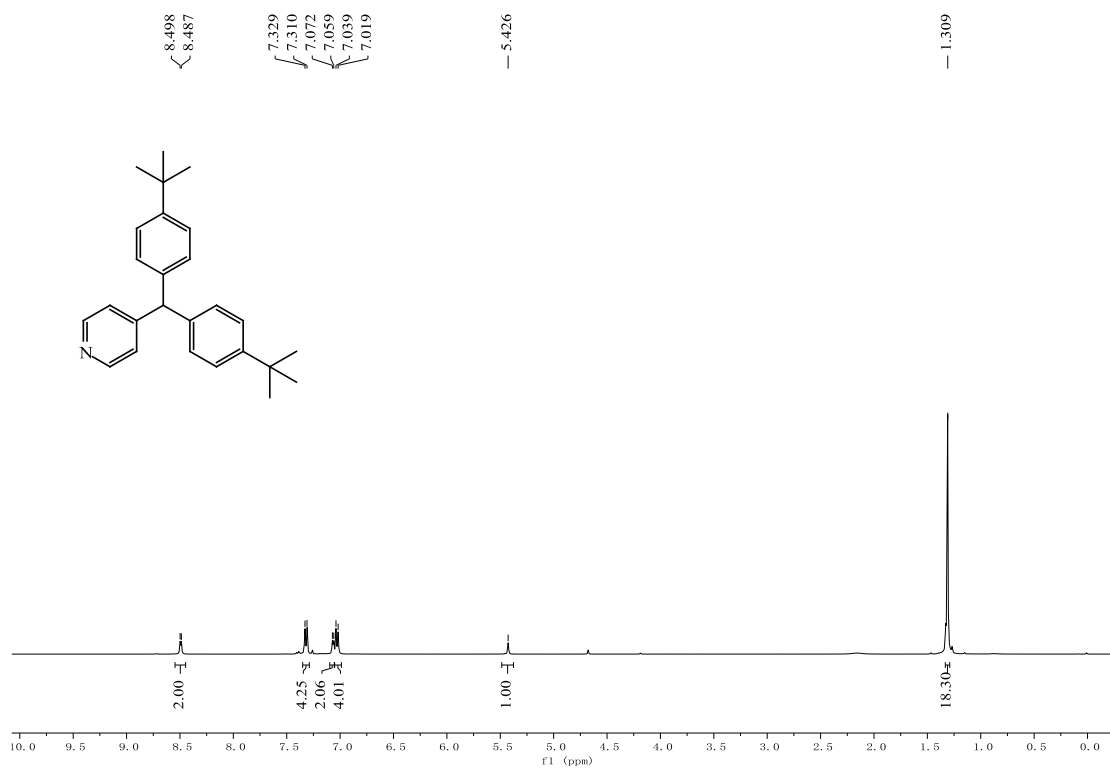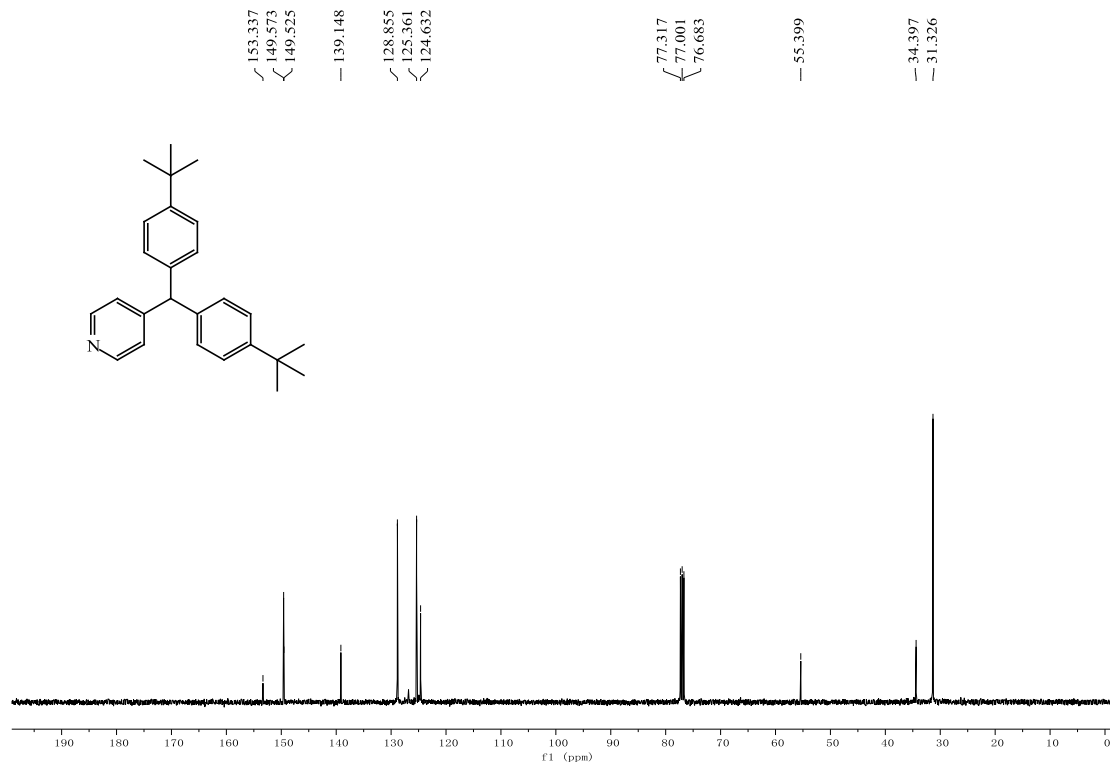

### 4-(bis(4-Methoxyphenyl)methyl)pyridine (4h)

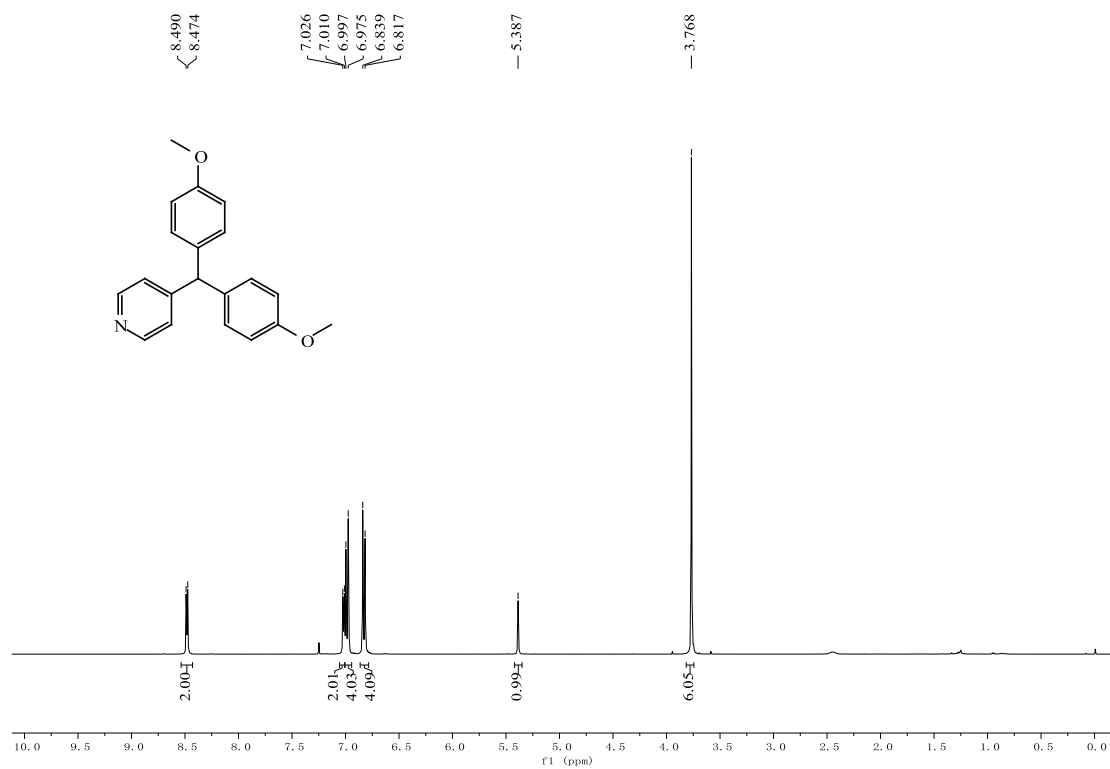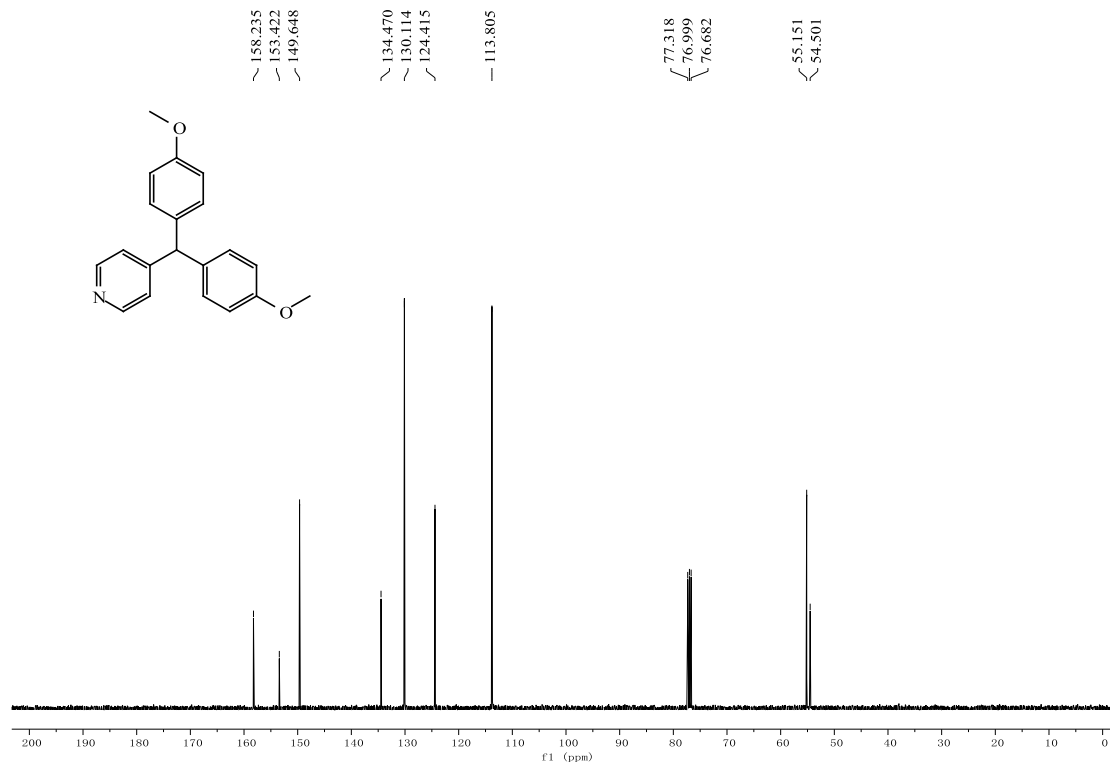

### 4-(bis(4-*tert*-butyl)phenyl)methylpyridine (4i)



**4-(bis(4-Fluorophenyl)methyl)pyridine (4j)**

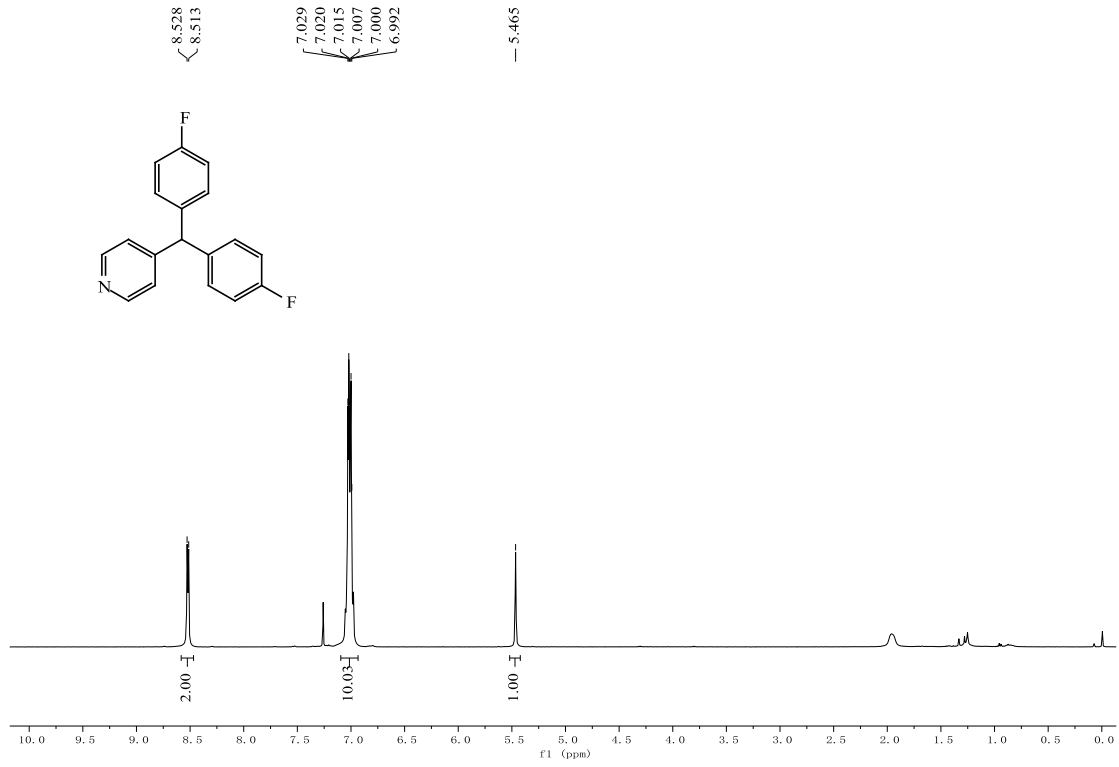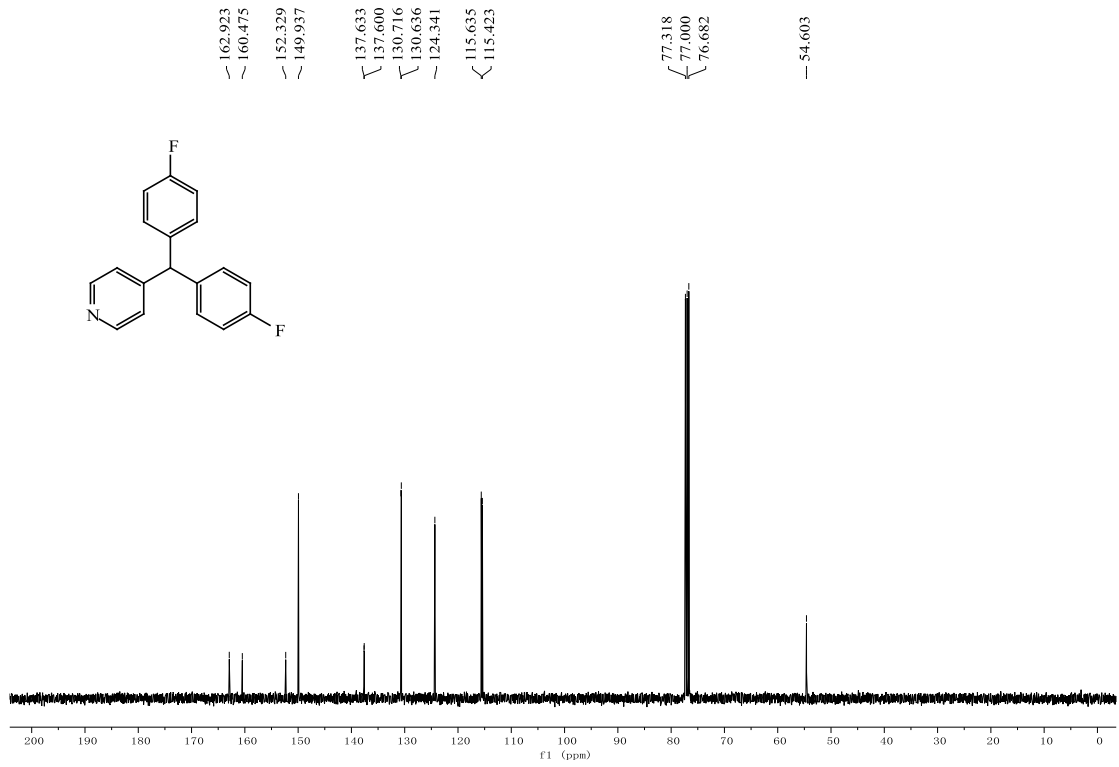

**4-((4-(*tert*-Butyl)phenyl)(4-methoxyphenyl)methyl)pyridine (4k)**

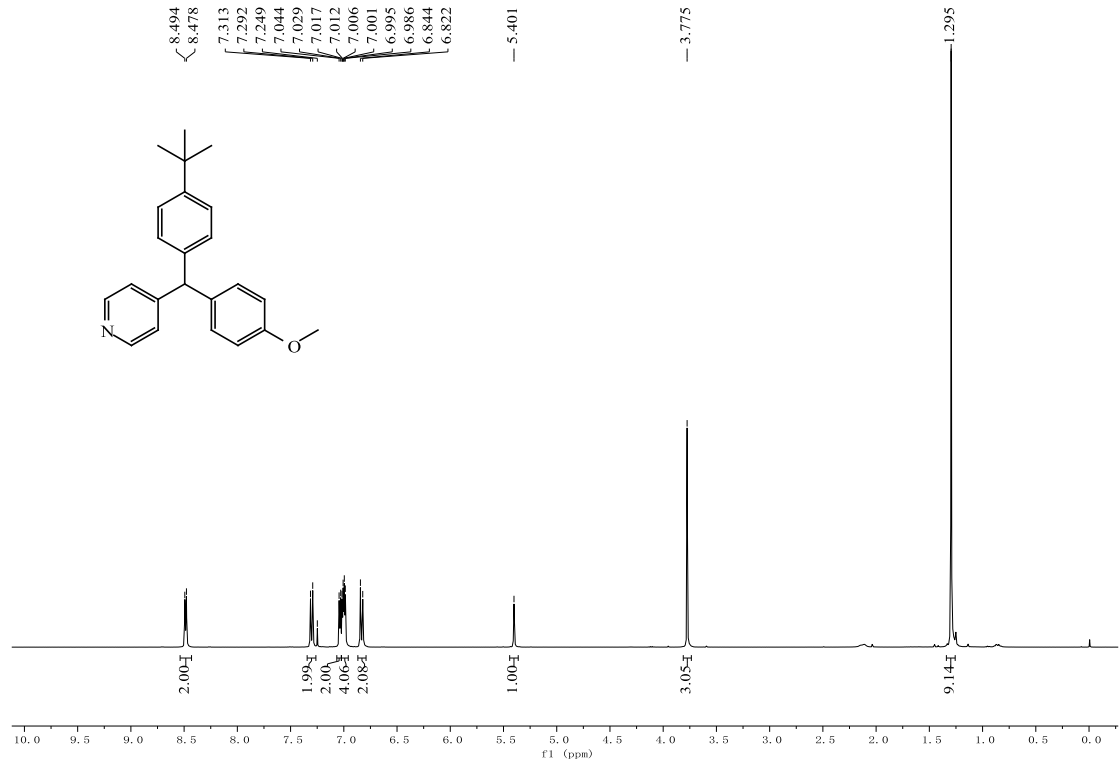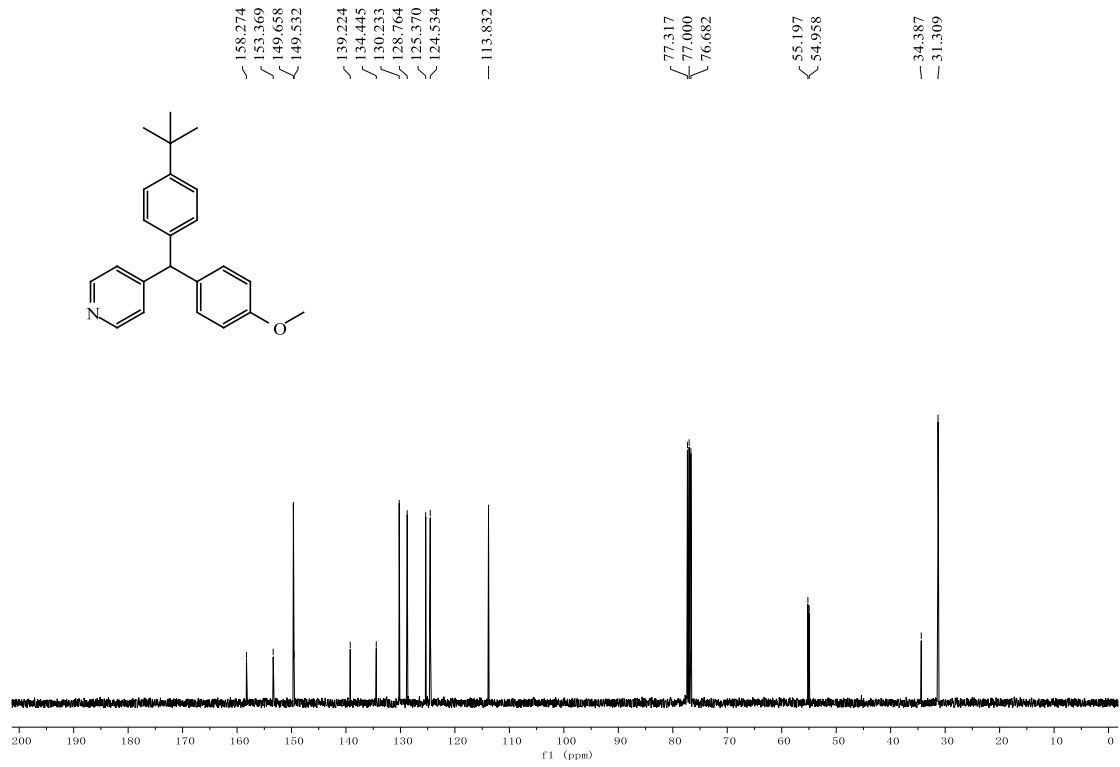



**4-((4-Methoxyphenyl)(p-tolyl)methyl)pyridine (4I)**

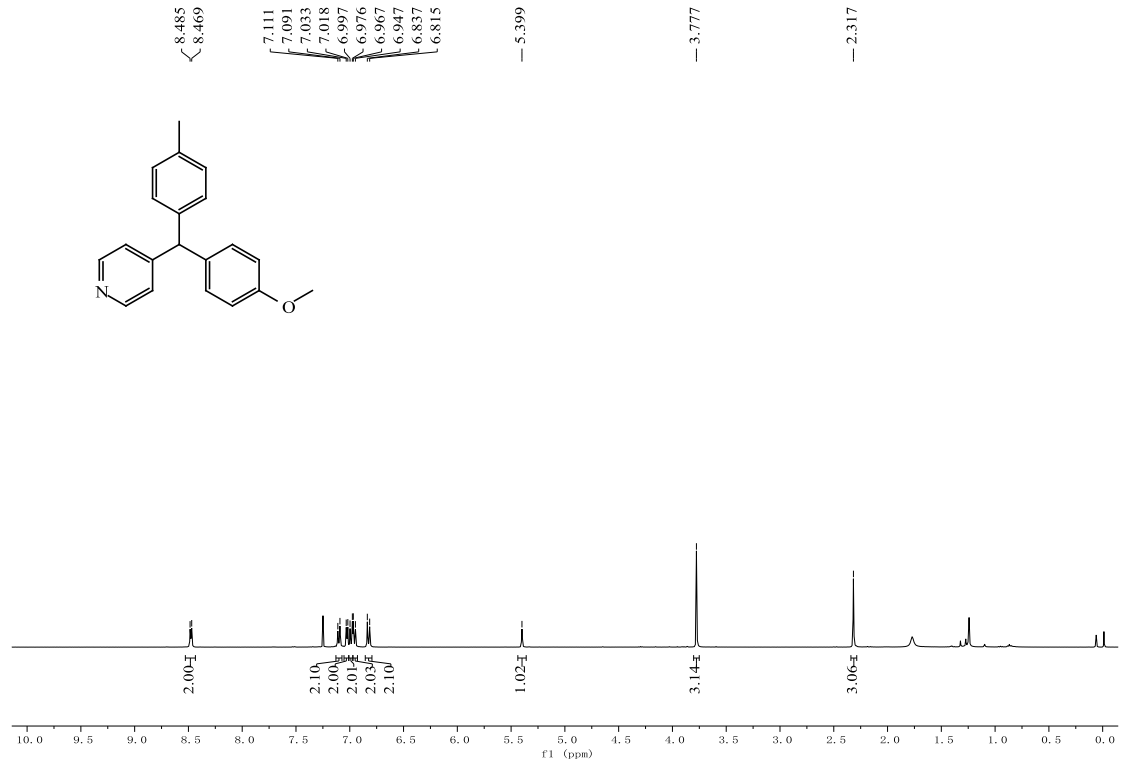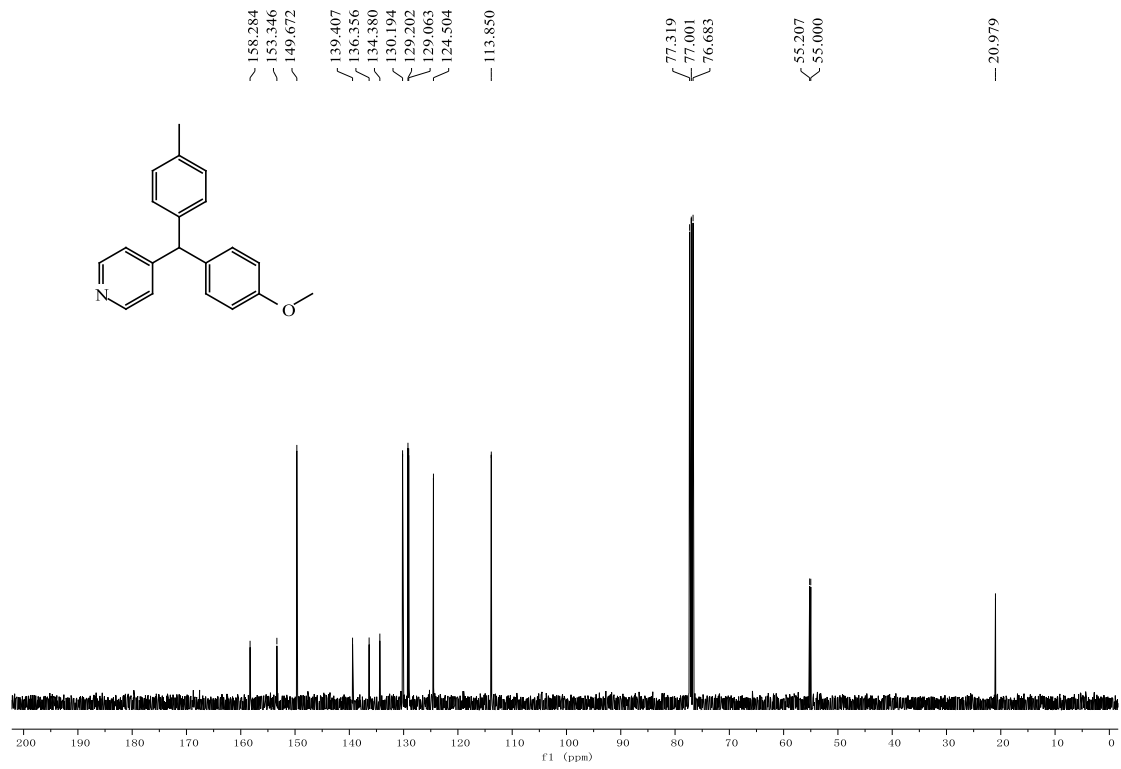

**4-((4-Fluorophenyl)(4-methoxyphenyl)methyl)pyridine (4m)**

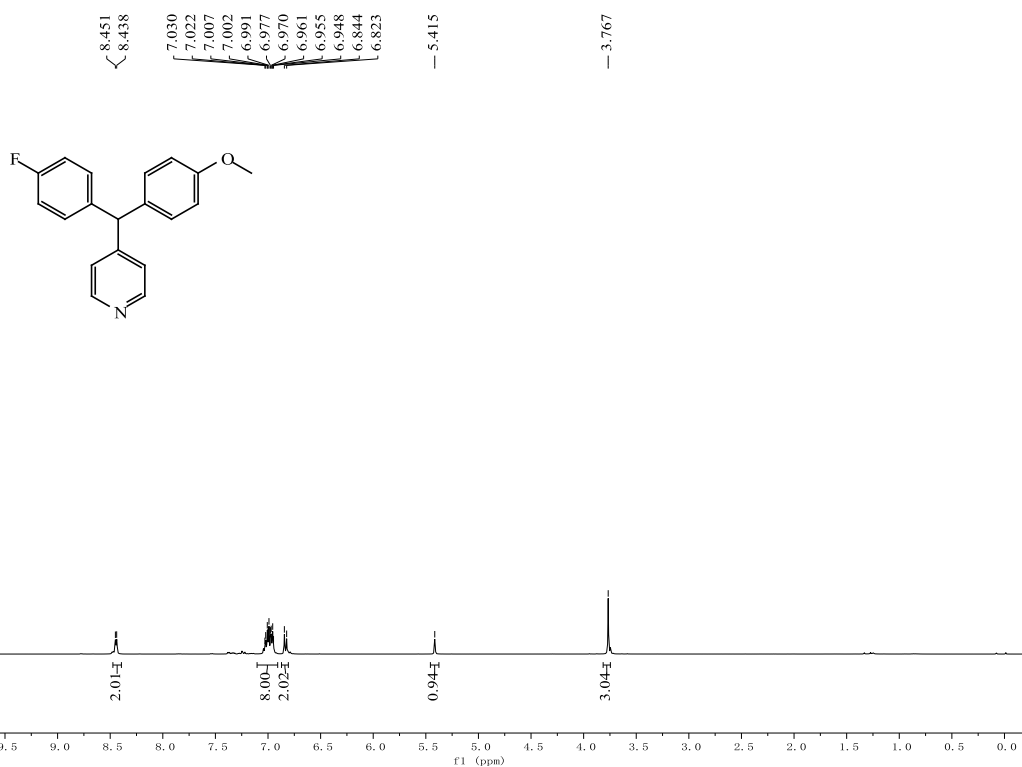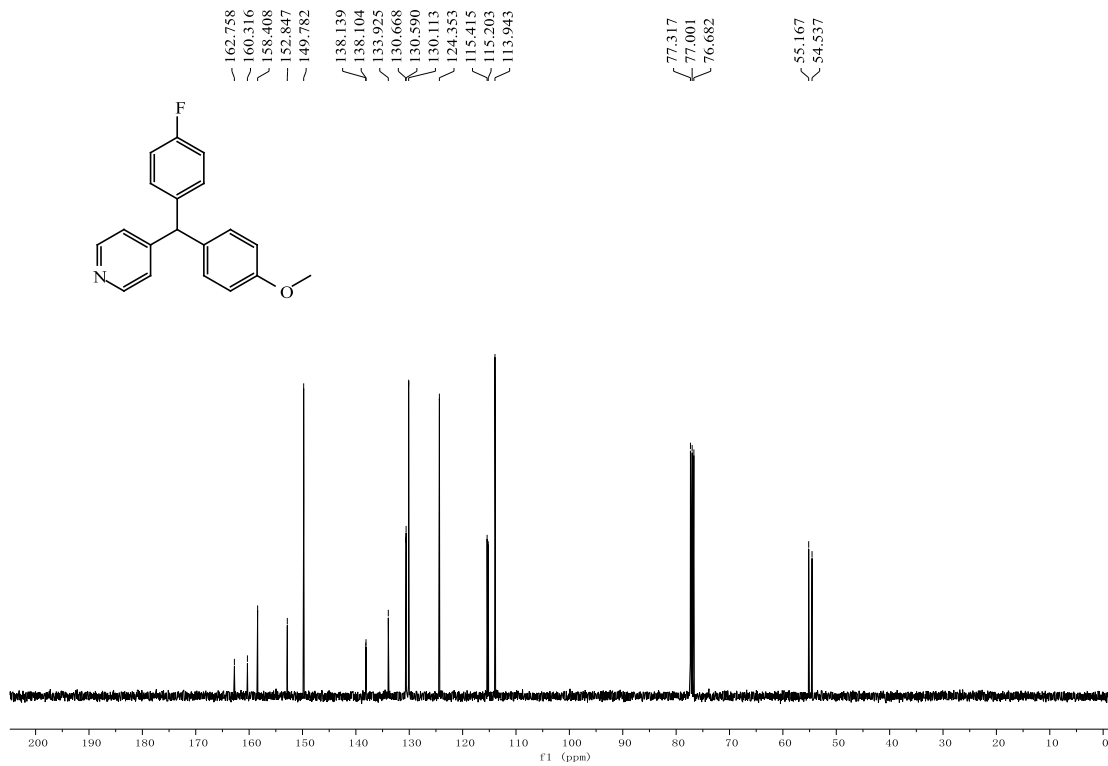

**4-((4-Chlorophenyl)(4-methoxyphenyl)methyl)pyridine (4n)**

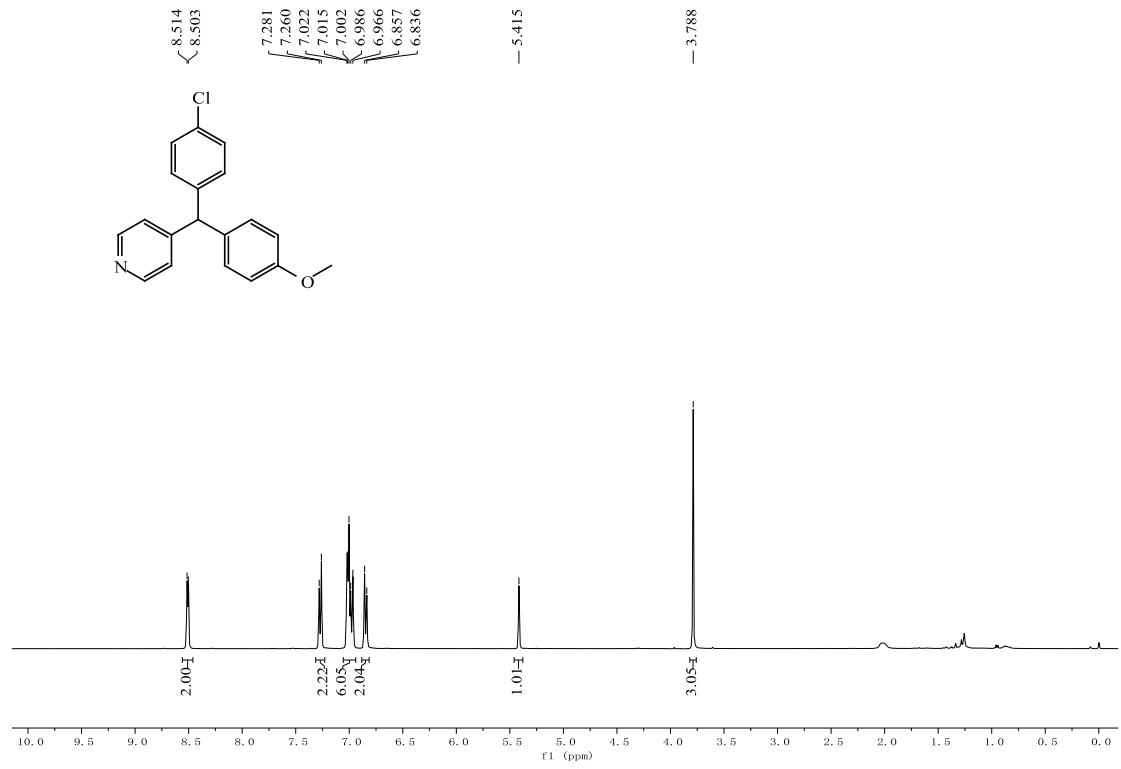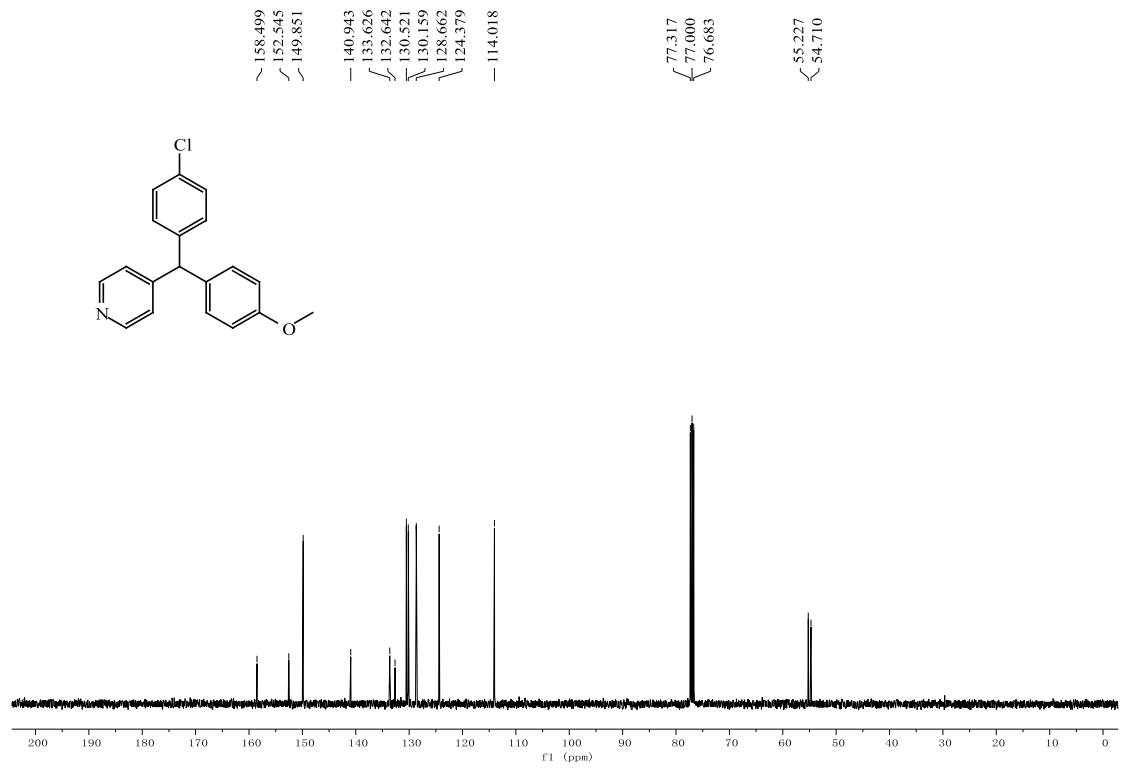

### 4-(Phenyl(thiophen-2-yl)methyl)pyridine (40)

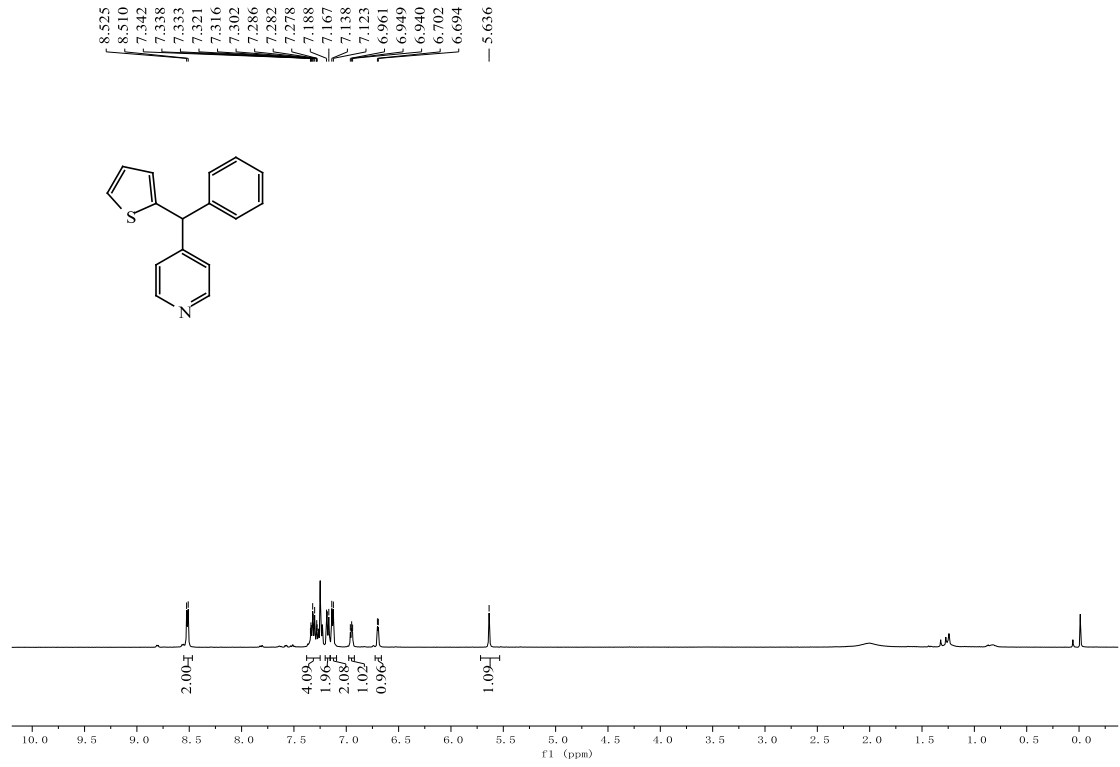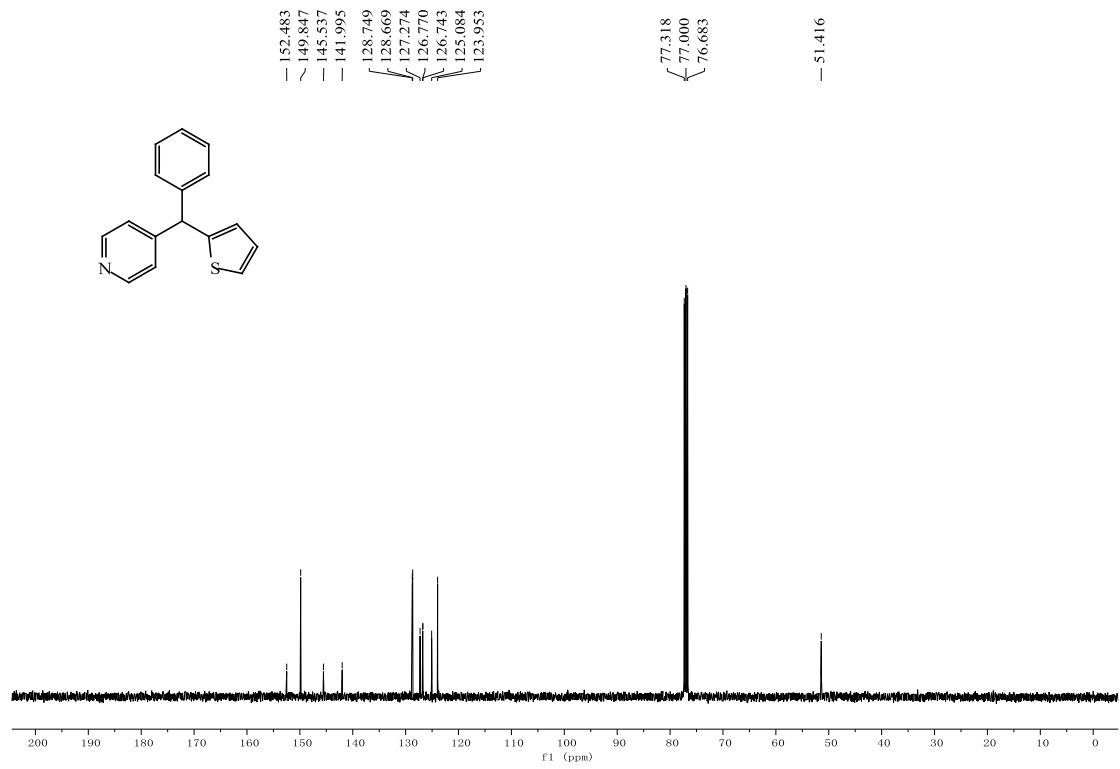

4-((4-Methoxyphenyl)(thiophen-2-yl)methyl)pyridine (4p)

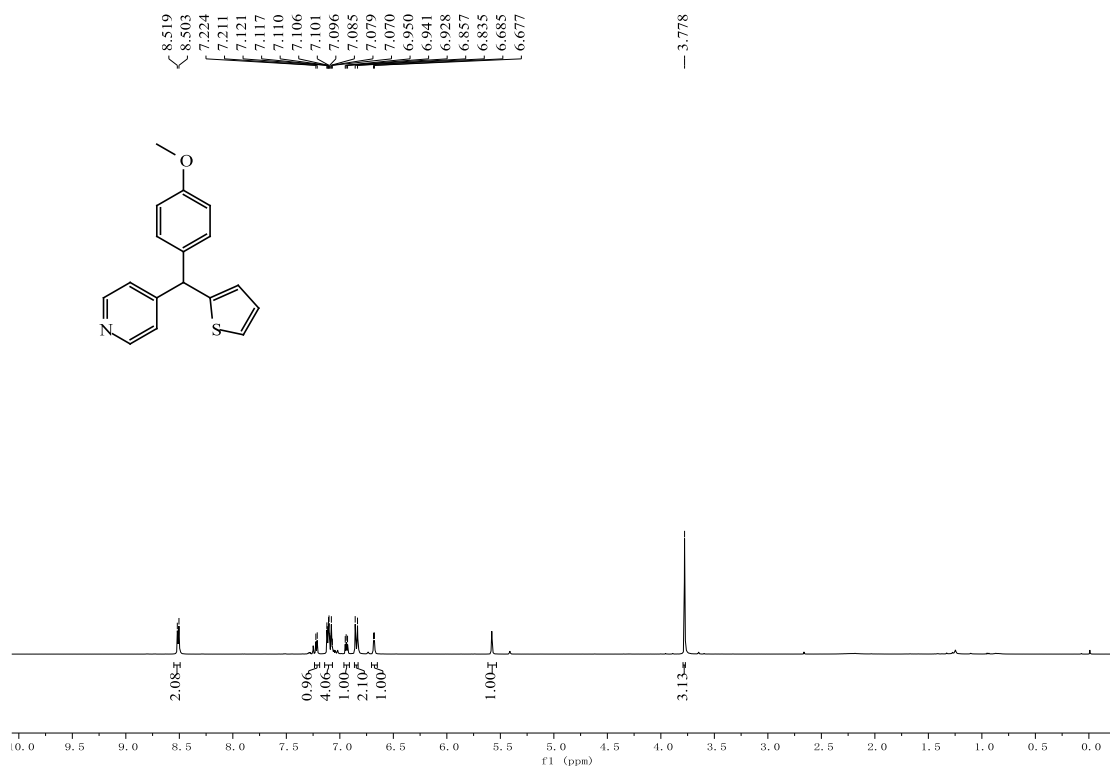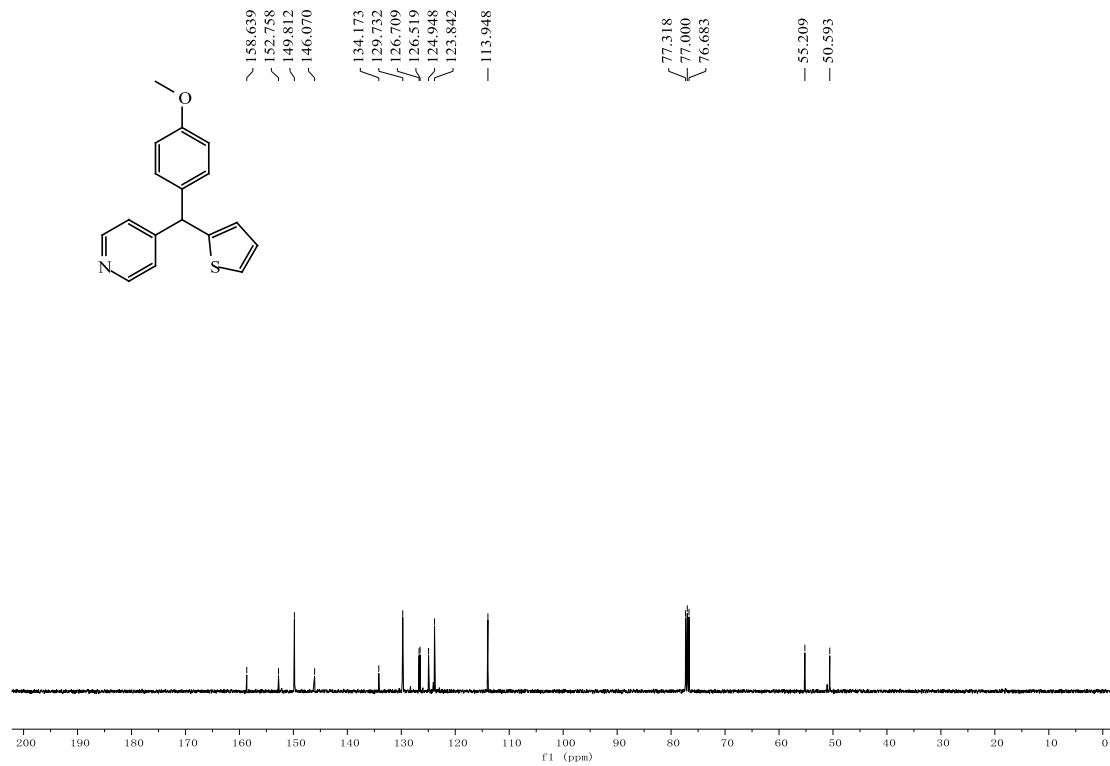

4-((4-*tert*-Butyl)phenyl)(thiophen-2-yl)methylpyridine (4q)

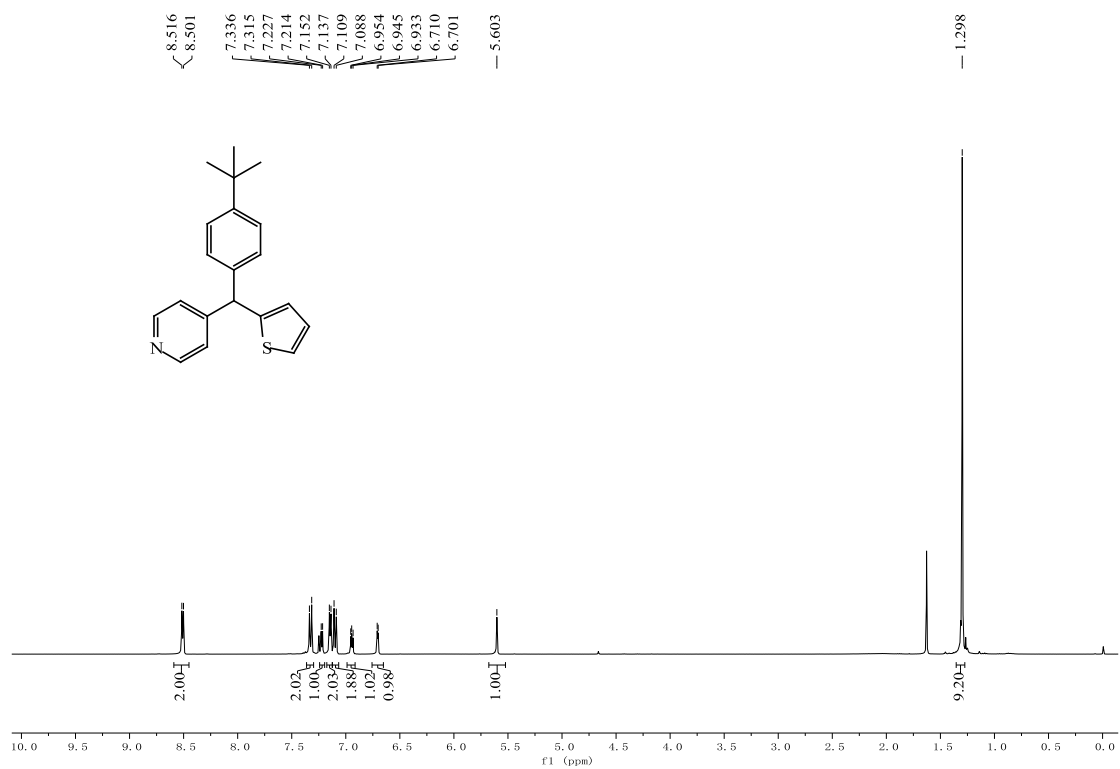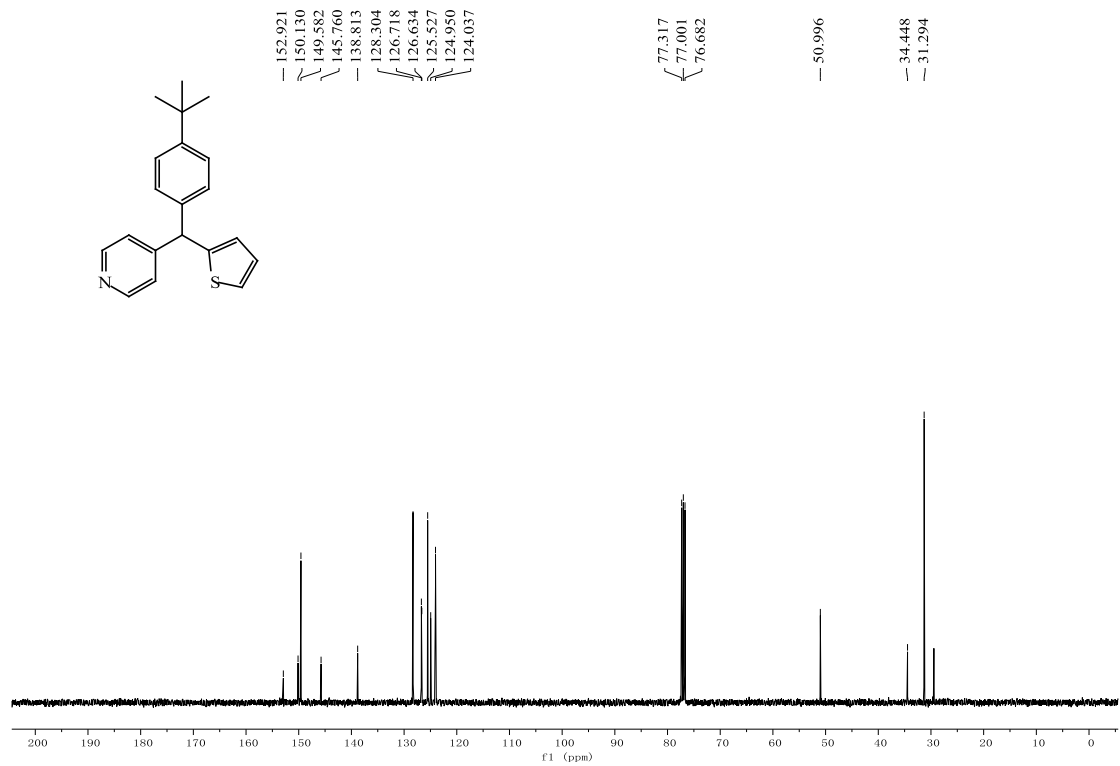

### 4-(Thiophen-2-yl(p-tolyl)methyl)pyridine (4r)

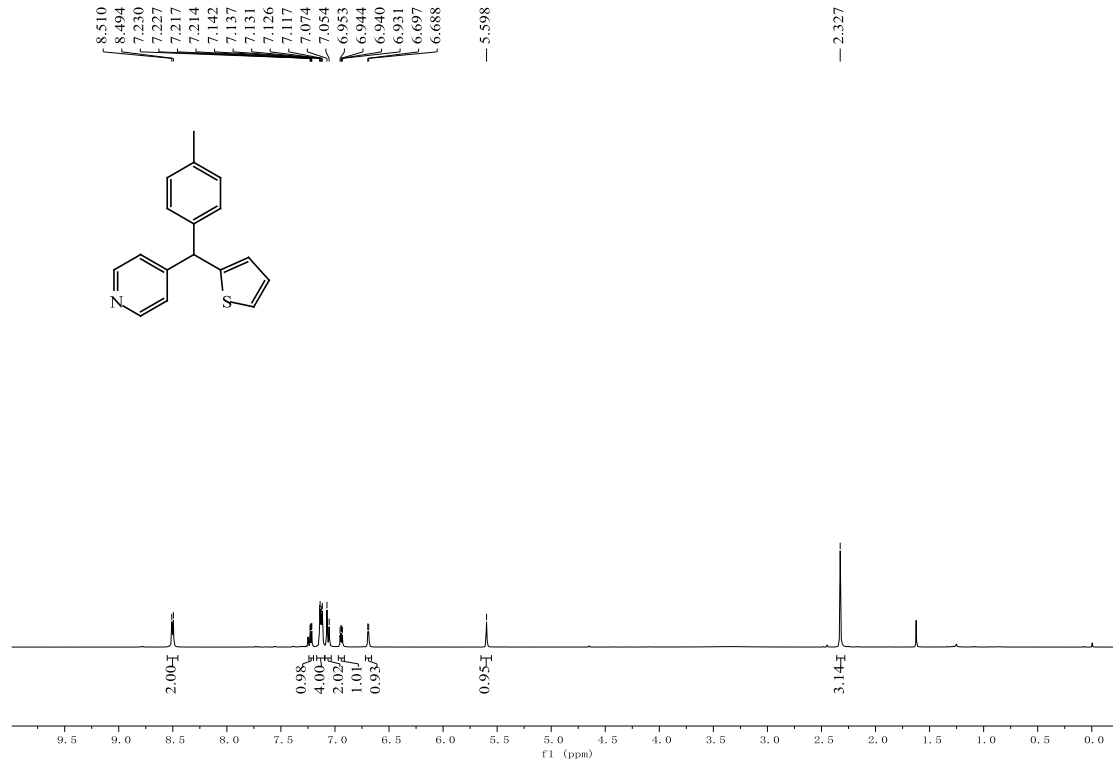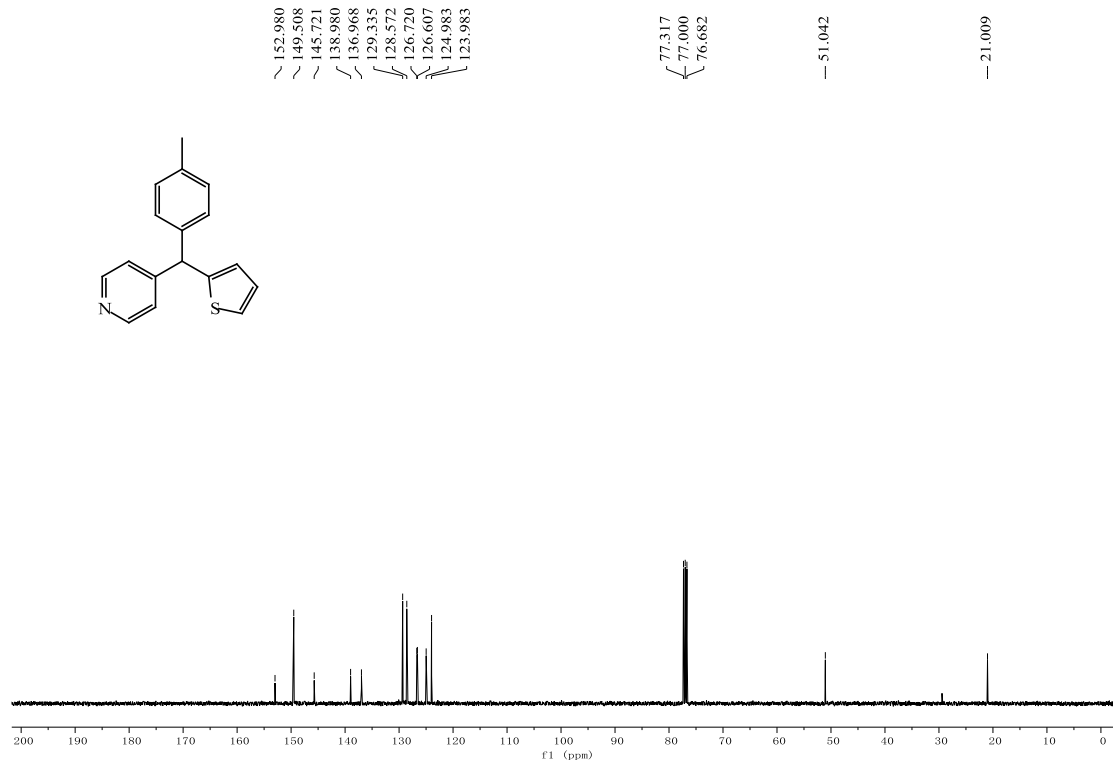

4-((4-Fluorophenyl)(thiophen-2-yl)methyl)pyridine (4s)

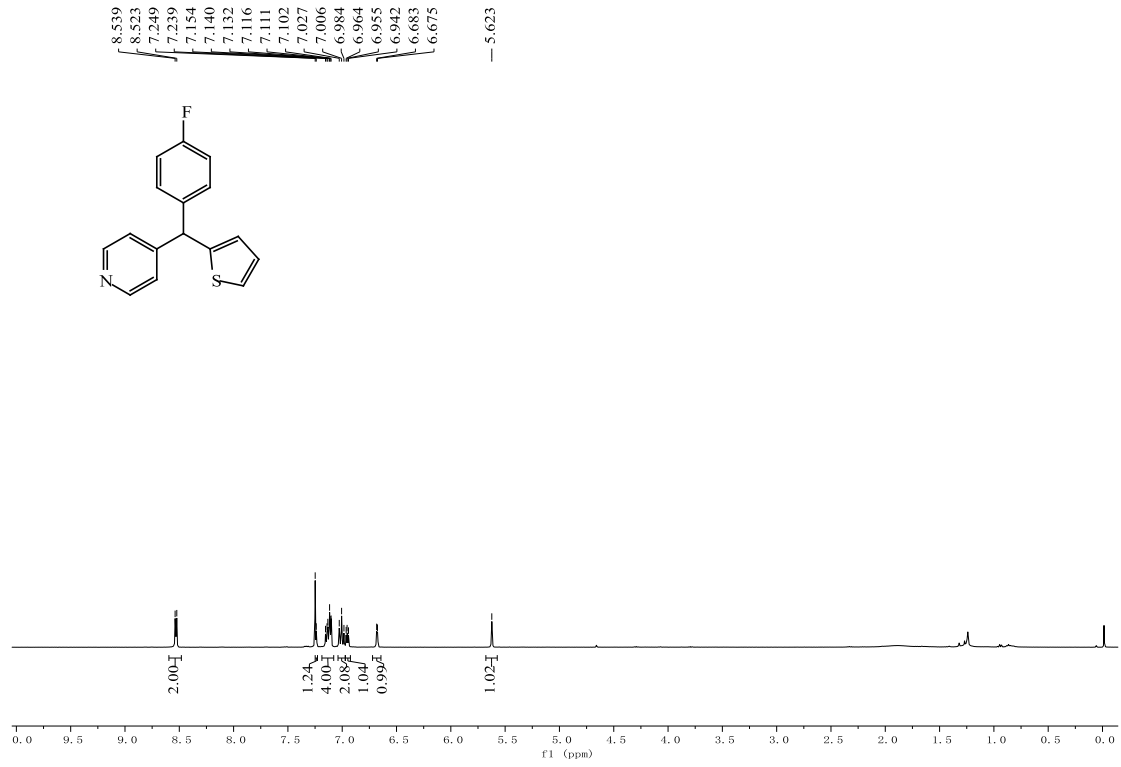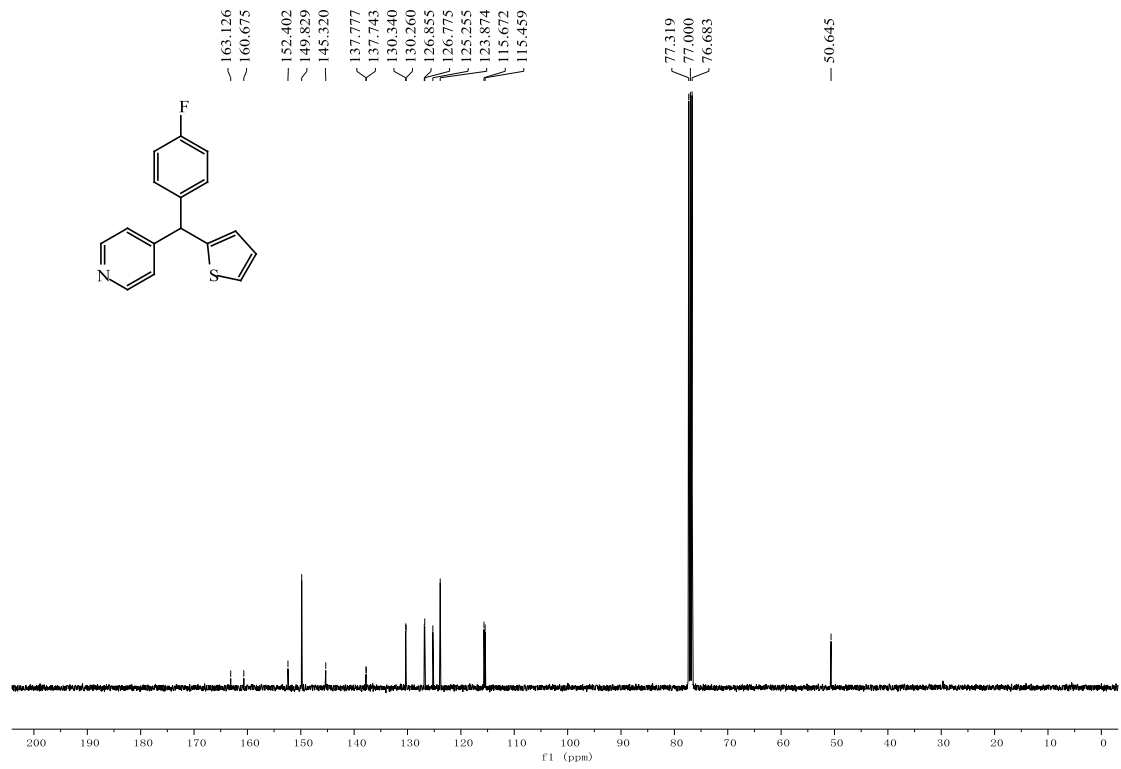



2-(4-(Pyridin-4-ylmethyl)phenoxy)ethyl 2-(2-fluoro-[1,1'-biphenyl]-4-yl)propanoate (5a)

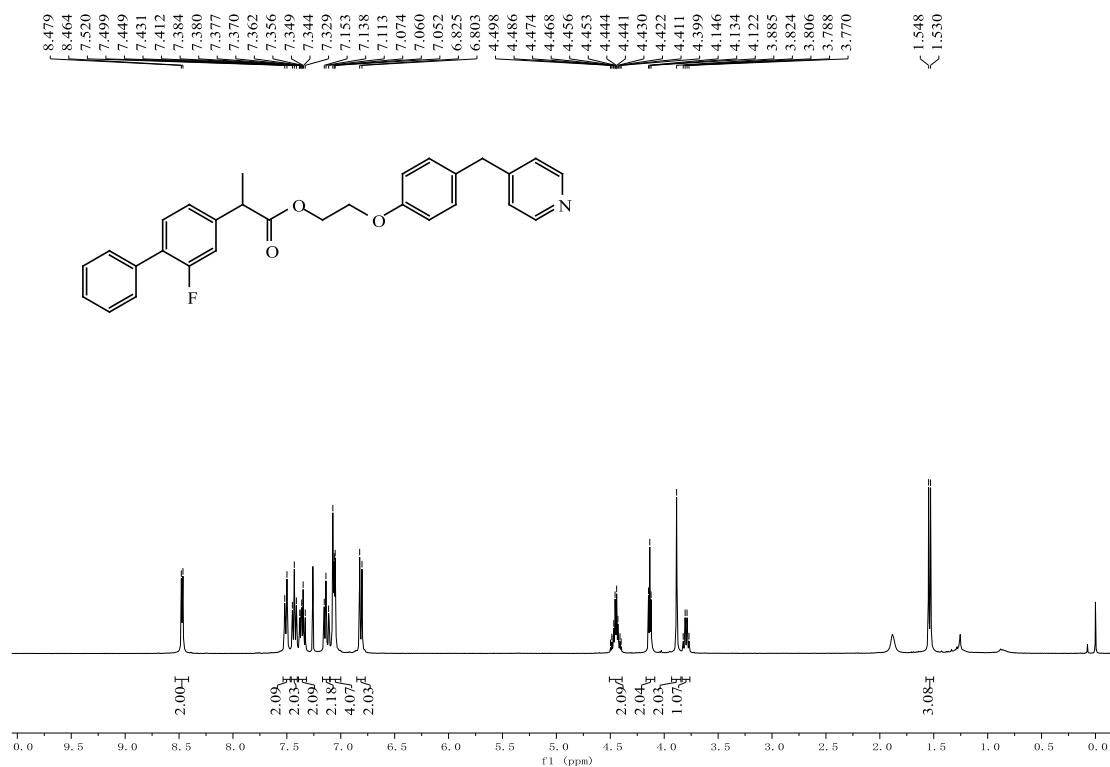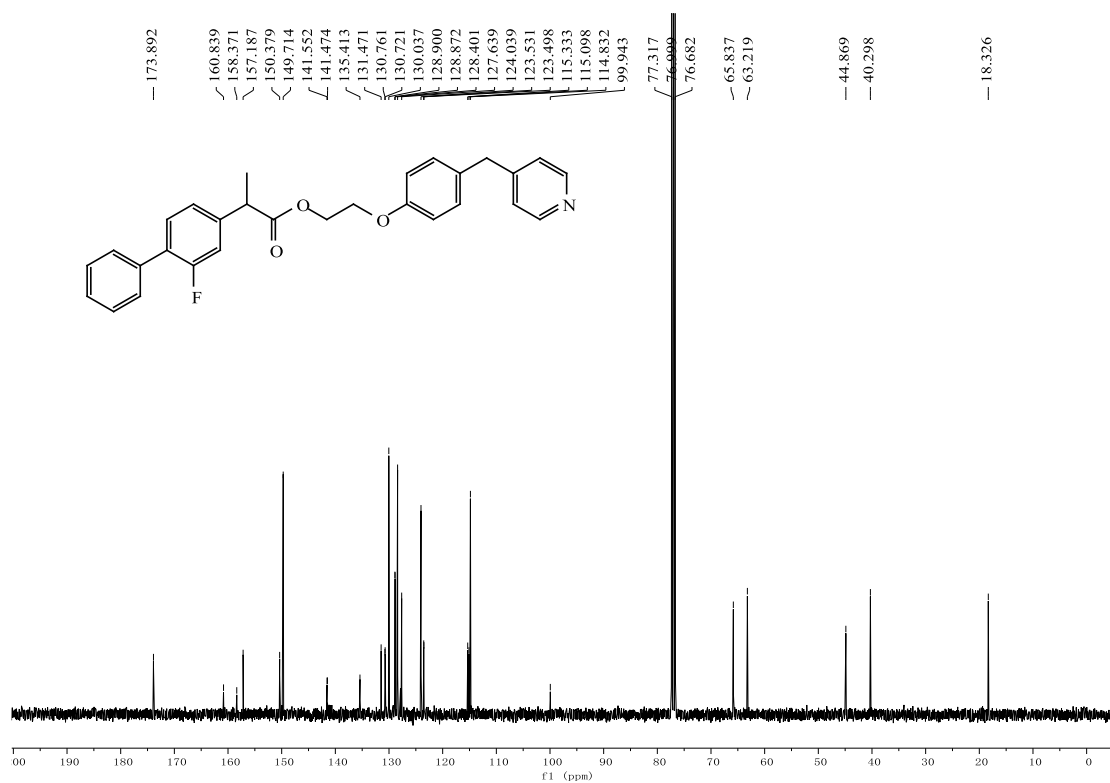

2-(4-(Pyridin-4-ylmethyl)phenoxy)ethyl 2-(3-benzoylphenyl)propanoate (5b)

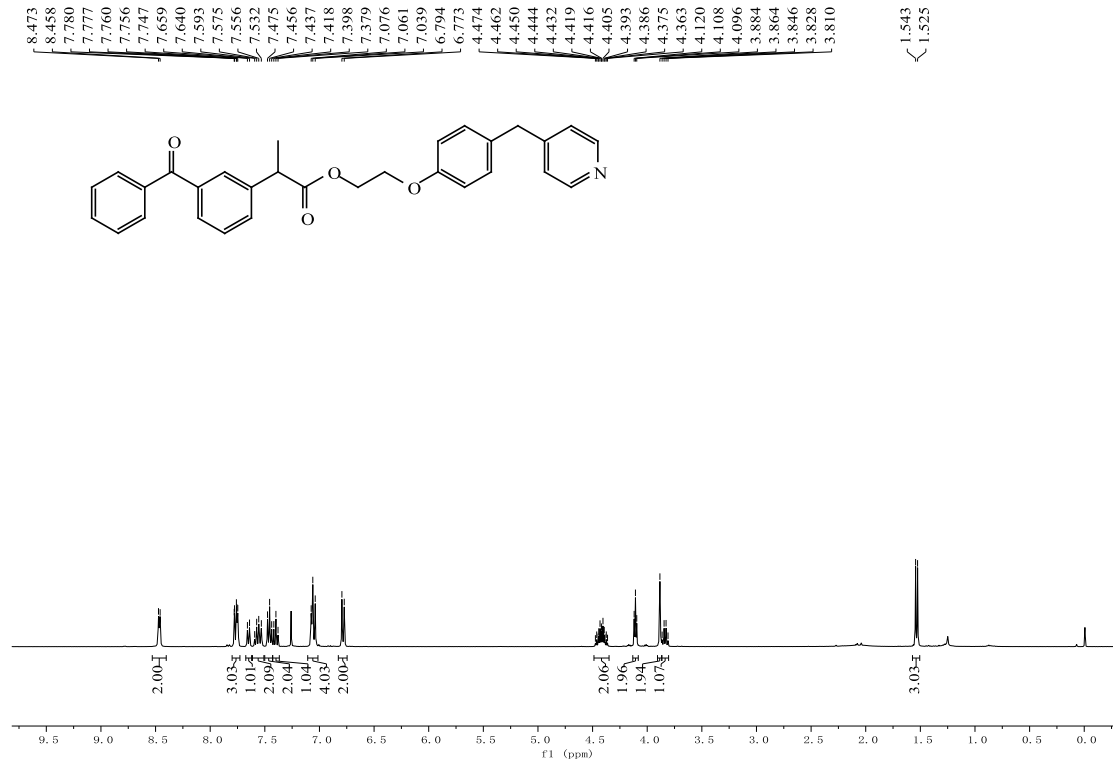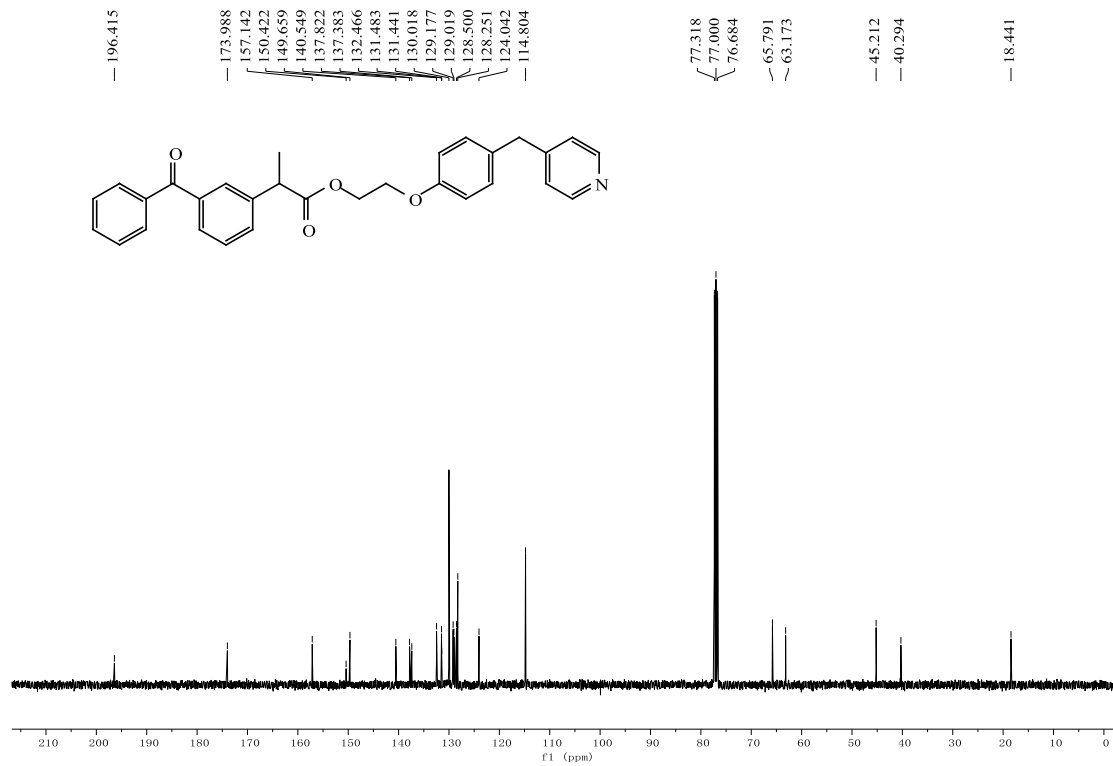

**2-(4-(Pyridin-4-ylmethyl)phenoxy)ethyl 2-(4-((2-oxocyclopentyl)methyl)phenyl)propanoate (5c)**

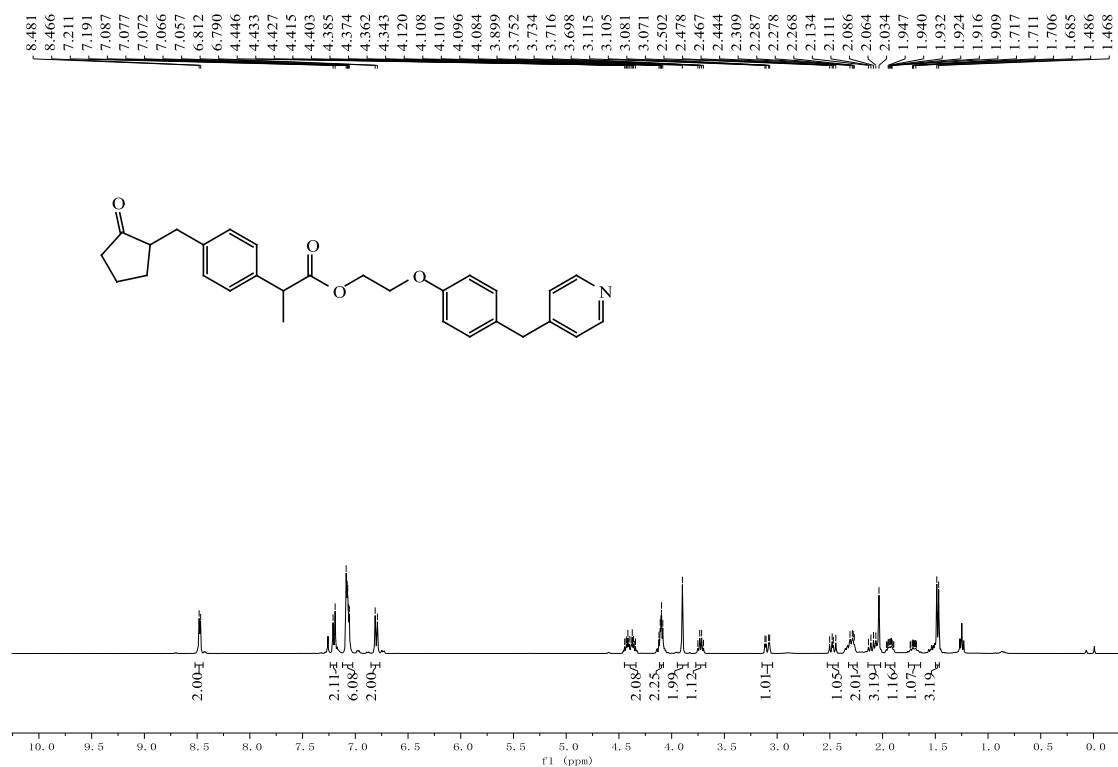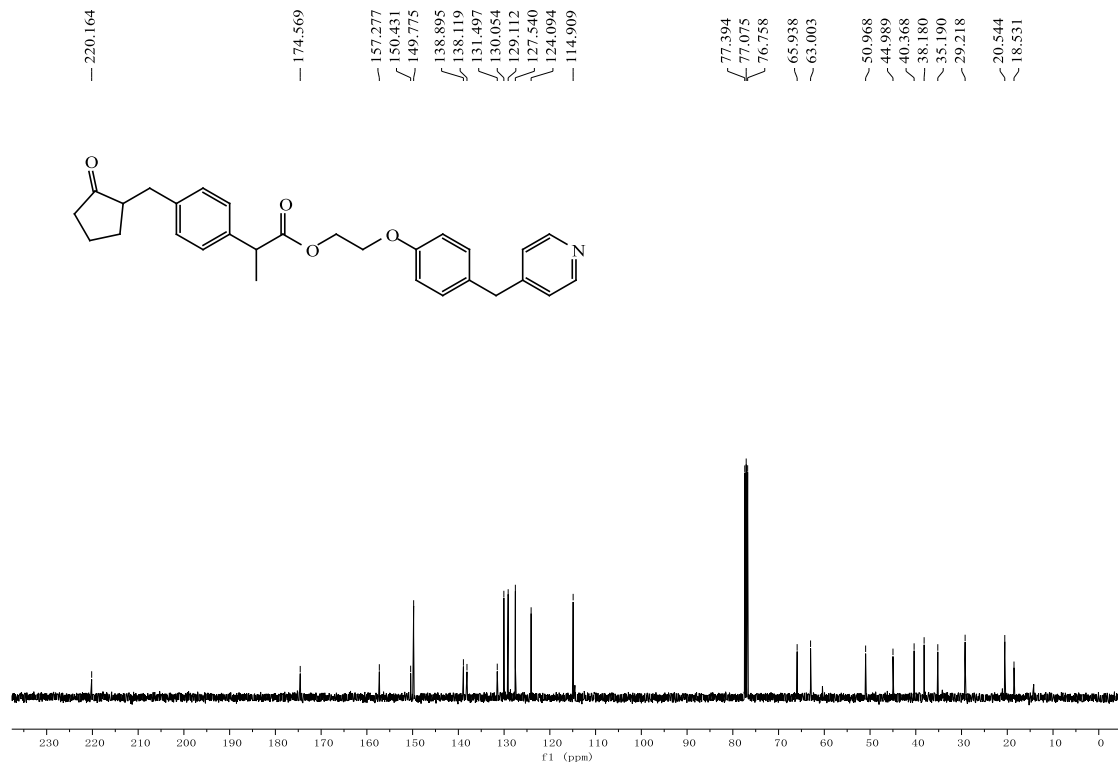

2-(4-(Pyridin-4-ylmethyl)phenoxy)ethyl 2-(11-oxo-6,11-dihydrodibenzo[b,e]oxepin-9-yl)acetate

(5d)

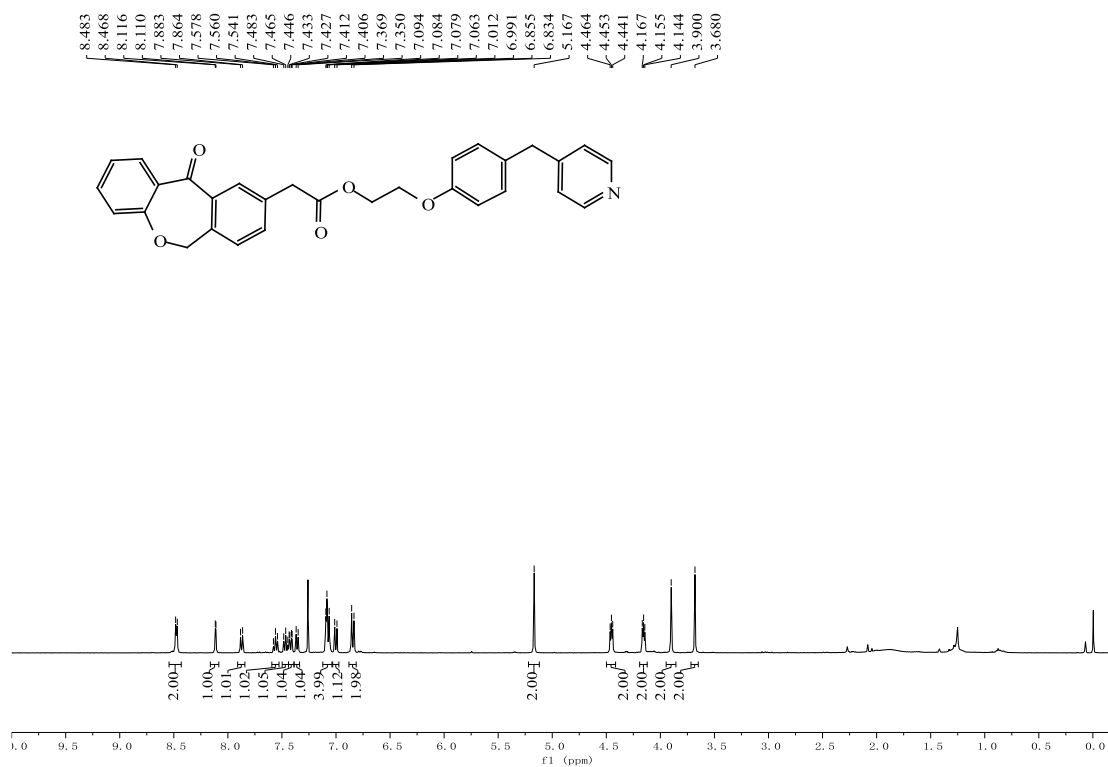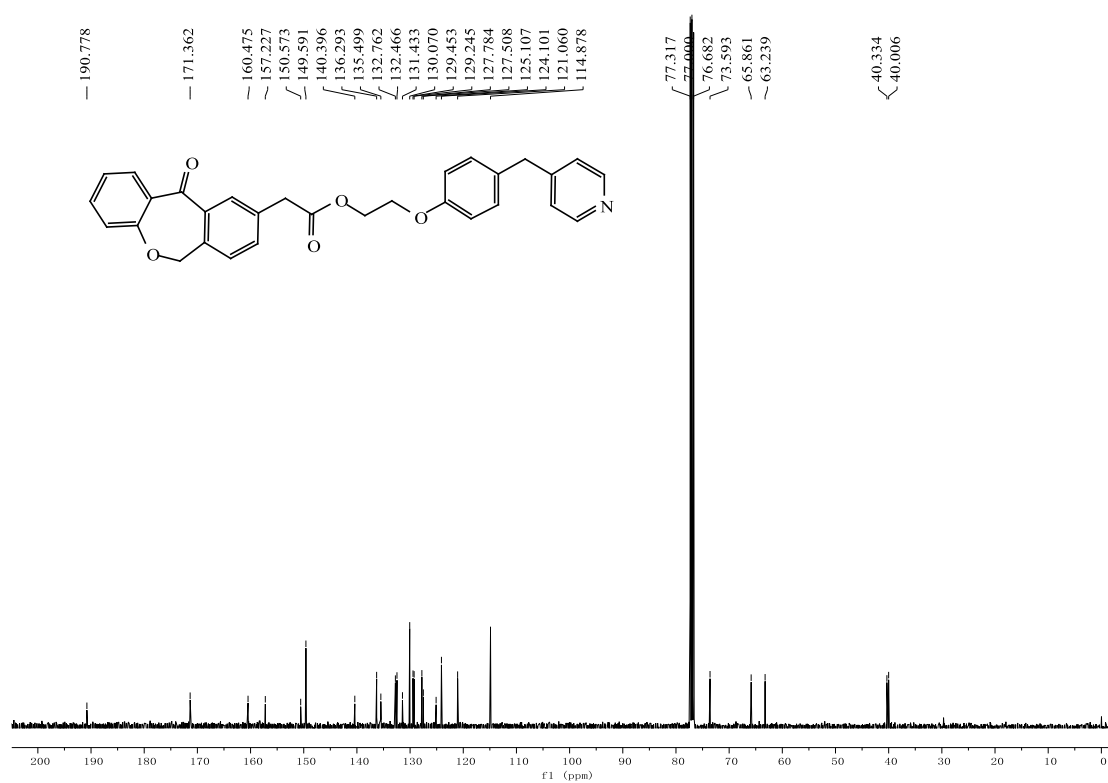

**2-(4-(2,2-dichlorocyclopropyl)phenoxy)ethyl 2-(4-(pyridin-4-ylmethyl)phenoxy)-2-methylpropanoate (5e)**

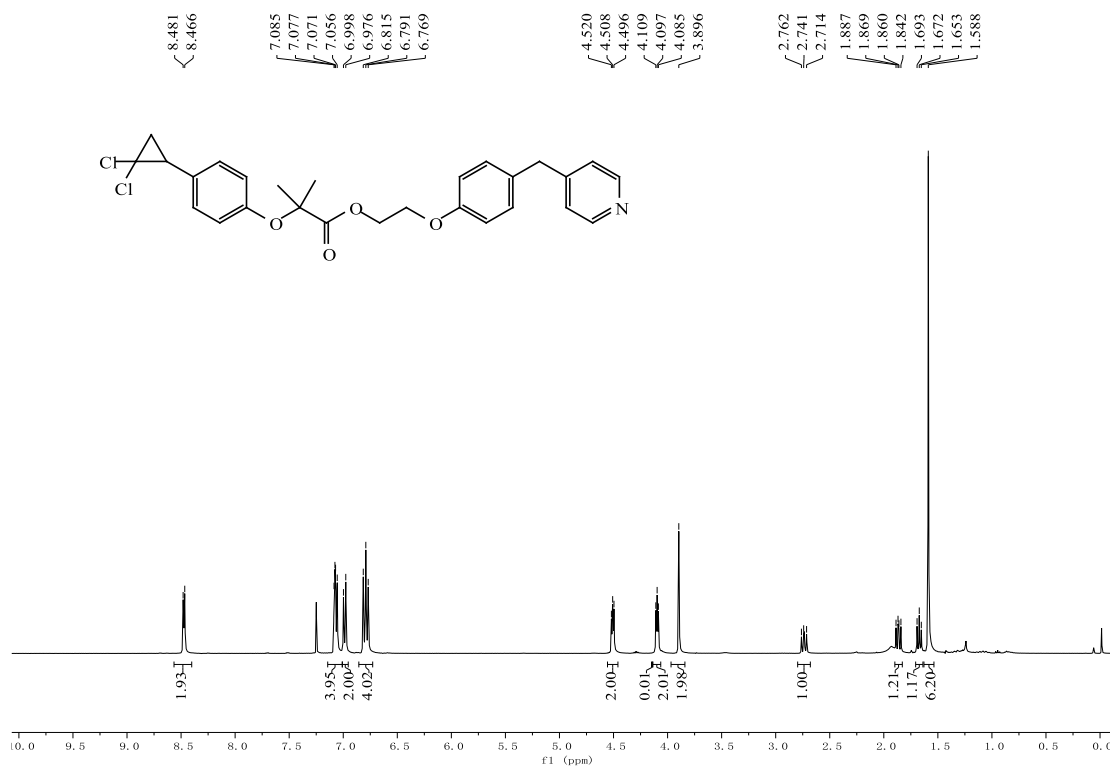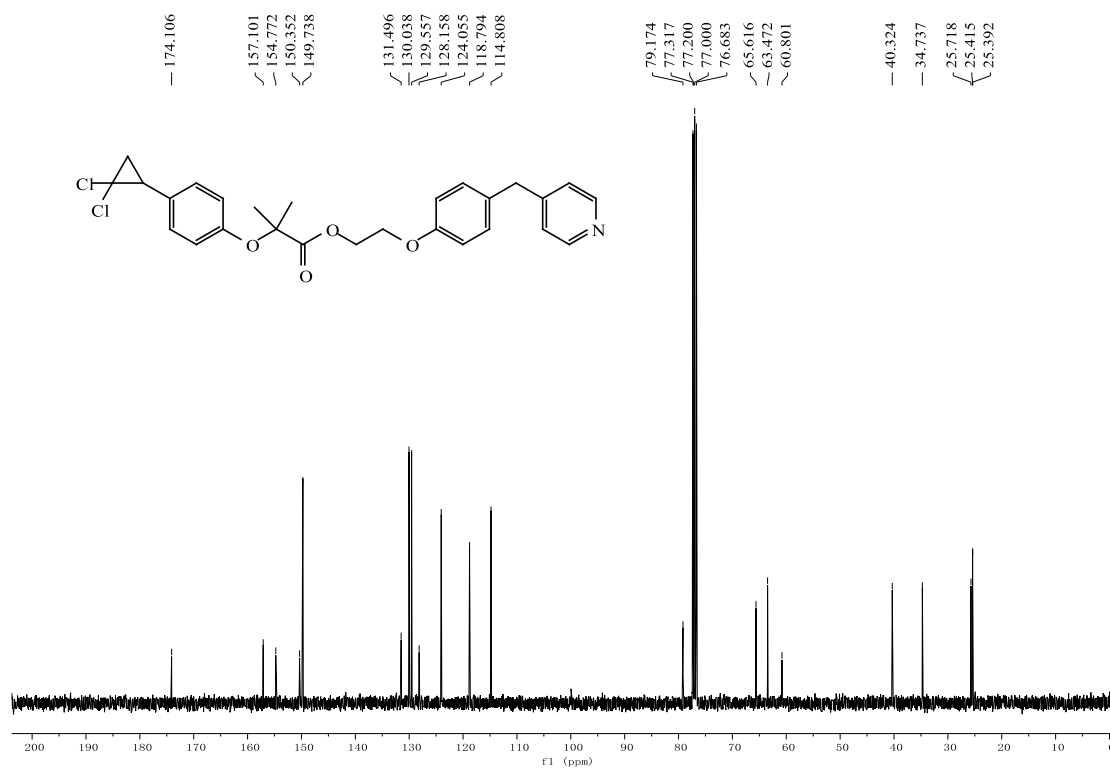

**2-(4-(Pyridin-4-ylmethyl)phenoxy)ethyl 2-(1-(4-chlorobenzoyl)-5-methoxy-2-methyl-1H-indol-3-yl)acetate (5f)**

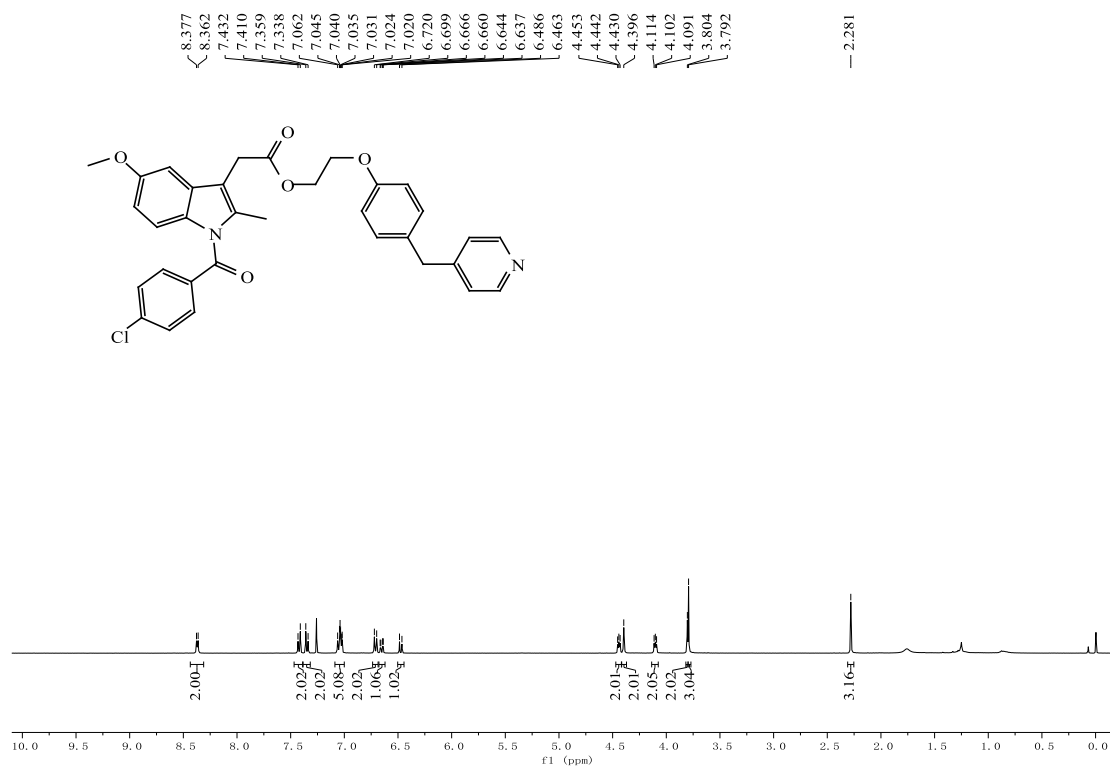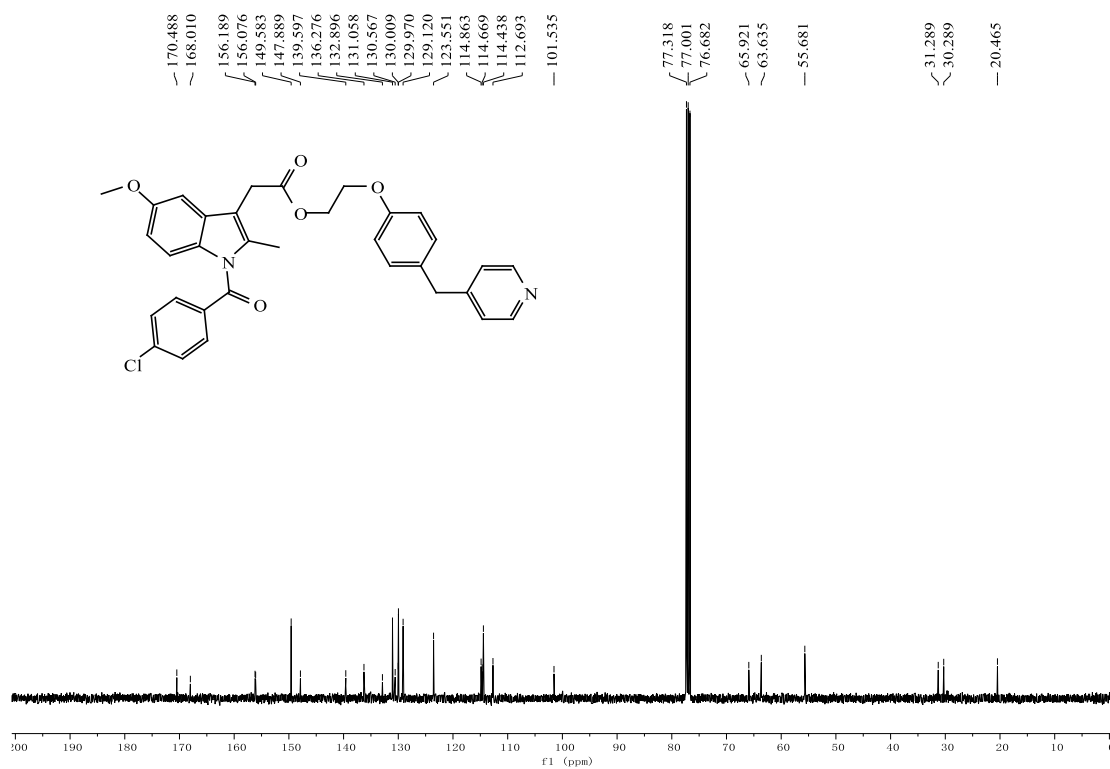

4-(2-phenylpropan-2-yl)pyridine (6)

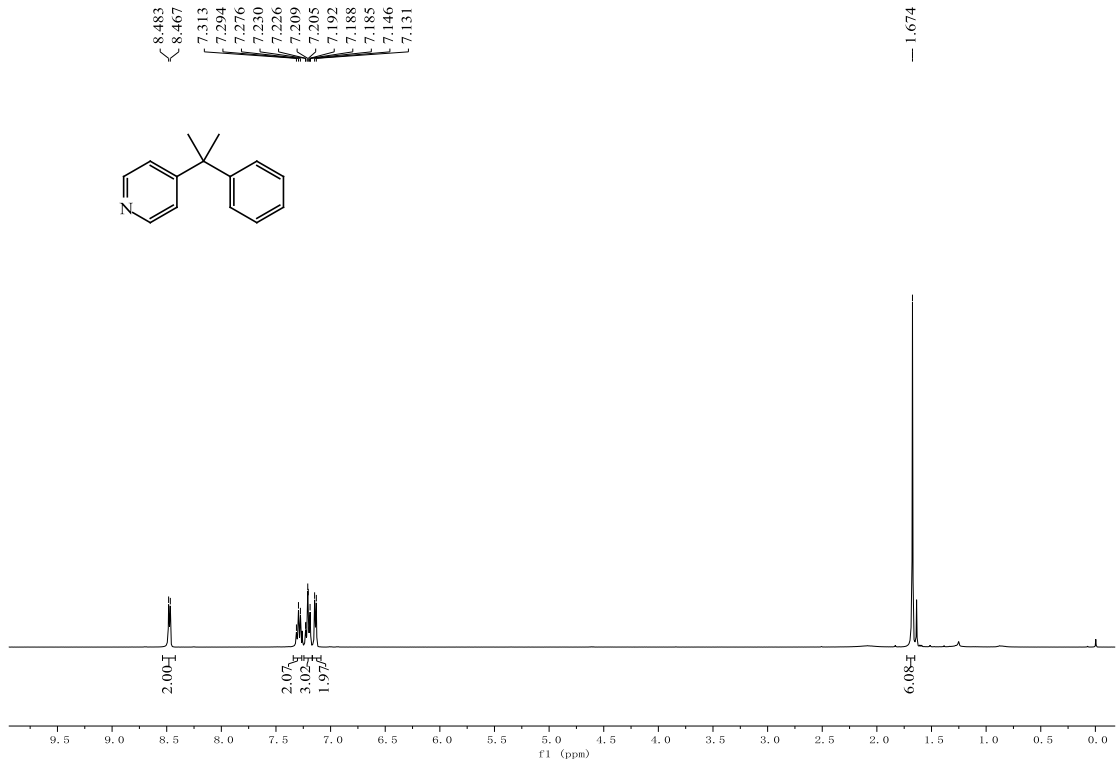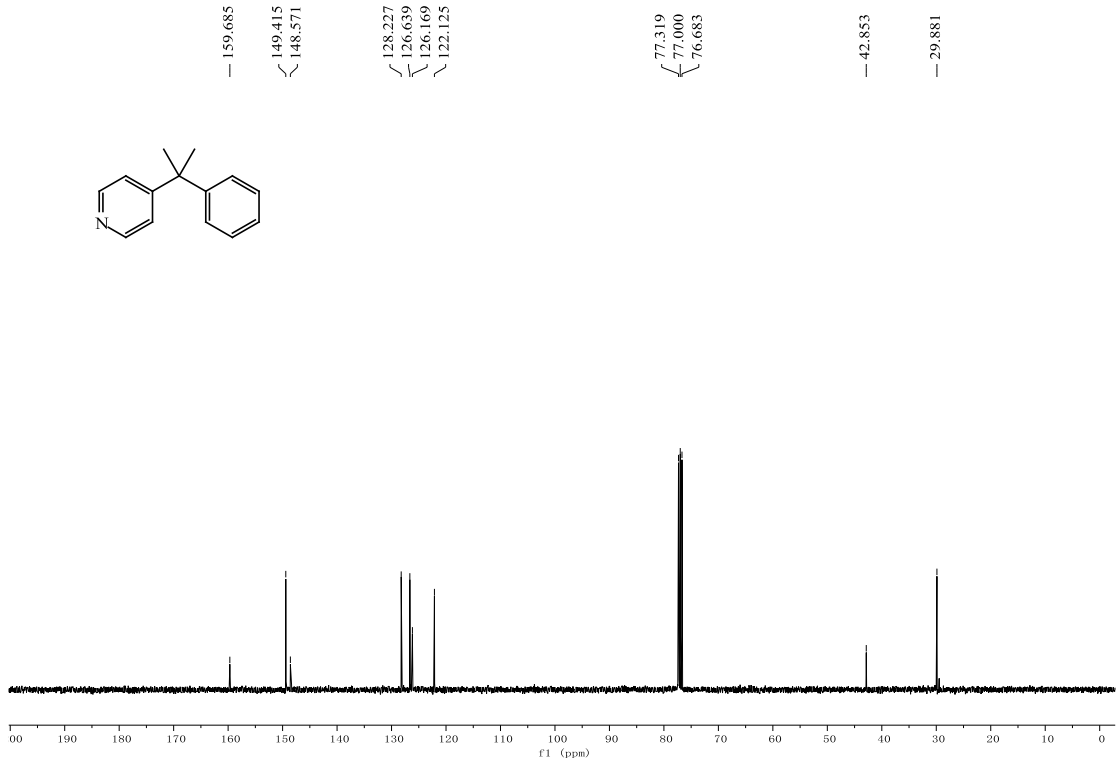

Supplement: d2qo01908f1.pdf [file d2qo01908f1.pdf]
